# Supplementary material for: IF5 affects the final stage of the Cl–F exchange fluorination in the synthesis of pentafluoro-λ6-sulfanyl-pyridines, pyrimidines and benzenes with electron-withdrawing substituents
Source: Royal Society of Chemistry journal article supplement (doi:10.1039/c7cc02802d), 2017-01-01

## Electronic Supplementary Information

### IF<sub>5</sub> affects the final stage of the Cl-F exchange fluorination in the synthesis of pentafluoro-λ<sup>6</sup>-sufanyl-pyridines, pyrimidines and benzenes with electron-withdrawing substituents

Benqiang Cui<sup>a</sup>, Mikhail Kosobokov<sup>a</sup>, Kohei Matsuzaki,<sup>a</sup> Etsuko Tokunaga<sup>a</sup> and Norio Shibata<sup>\*a</sup>,

<sup>a</sup>Department of Nanopharmaceutical Sciences, Nagoya Institute of Technology, Gokiso, Showa-ku, Nagoya 466-8555, Japan.

#### Table of Contents

|                                                                                                                                          |    |
|------------------------------------------------------------------------------------------------------------------------------------------|----|
| 1. General Information .....                                                                                                             | 2  |
| 2. General Procedure for Synthesis of arylsulfur pentafluorides.....                                                                     | 2  |
| 3. Table S1. Competitive relationship between 3a and Py-F by-product .....                                                               | 3  |
| 4. General Procedure for Synthesis of arylsulfur chlorotetrafluorides .....                                                              | 3  |
| 5. Table S2. The procedure, yields, appearance and <sup>19</sup> F NMR data of arylsulfur chlorotetrafluorides 2a-p <sup>1,2</sup> ..... | 4  |
| 6. Table S3. Optimizing of the Cl-F exchange reactions of 2c. ....                                                                       | 4  |
| 7. Table S4. Optimizing of the Cl-F exchange reactions of 2d.....                                                                        | 5  |
| 8. Table S5. Optimizing of the Cl-F exchange reactions of 2e. ....                                                                       | 5  |
| 9. Table S6. Optimizing of the Cl-F exchange reactions of 2n.....                                                                        | 5  |
| 10. Table S7. Optimizing of the Cl-F exchange reaction of 2l.....                                                                        | 6  |
| 11. Table S8. Time course of the reaction process of 2a. ....                                                                            | 6  |
| 12. Table S9. Time course of the reaction process of 2n. ....                                                                            | 6  |
| 13. EPS of IF <sub>5</sub> and Py- <i>o</i> -SF <sub>4</sub> Cl by DFT computation.....                                                  | 7  |
| 14. General Procedure for Synthesis of disulfides.....                                                                                   | 7  |
| 15. General Procedure of synthesis of 2-chloropyrimidines.....                                                                           | 9  |
| 16. Preparation of Compounds .....                                                                                                       | 9  |
| 17. References .....                                                                                                                     | 15 |
| 18. <sup>1</sup> H, <sup>19</sup> F and <sup>13</sup> C NMR Spectra of Products. ....                                                    | 17 |

## 1. General Information

Reactions were performed in oven-dried glassware under a positive pressure of nitrogen. Solvents were transferred via syringe and were introduced into the reaction vessels through a rubber septum. Column chromatography was carried out on a column packed with silica-gel 60N spherical neutral size 63-210  $\mu\text{m}$ . The  $^1\text{H}$ -NMR (300 MHz),  $^{13}\text{C}$ -NMR (125.8 MHz),  $^{19}\text{F}$ -NMR (282 MHz) spectra for solution in  $\text{CDCl}_3$  were recorded on a Bruker Avance 500, Bruker Avance 400 and a Varian Mercury 300. Chemical shifts ( $\delta$ ) are expressed in ppm downfield from internal TMS ( $\delta = 0.00$ ). The residual solvent signals were used as references (TMS:  $\delta \text{H} = 0.00$  ppm,  $\delta \text{C} = 77.16$  ppm; and  $\text{CFCl}_3$ :  $\delta \text{F} = 0.00$  ppm). The  $\text{CFCl}_3$  [ $\delta = 0.00$  ( $\text{CDCl}_3$ )] was used as internal standard for  $^{19}\text{F}$ -NMR. Mass spectra were recorded on a SHIMADZU GCMS-QP5050A (EI-MS) and SHIMADZU LCMS-2020 (ESI-MS). High resolution mass spectrometry was recorded on a Waters Synapt G2 HDMS (ESI-MS). Infrared spectra were recorded on a JASCO FT/IR-4100 spectrometer. Melting points were recorded on a BUCHI M-565. Commercially available chemicals were obtained from Acros Organics, Aldrich Chemical Co., Alfa Aesar, TCI, Ark Pharm and used as received unless otherwise stated.  $\text{IF}_5$  in a stainless-steel cylinder was supplied by Kanto Denka Kogyo Co Ltd.

## 2. General Procedure for Synthesis of arylsulfur pentafluorides

### Method A

Crude arylsulfur chlorotetrafluoride (0.72 mmol) was placed into FEP bottle in the glove box. From a cylinder,  $\text{IF}_5$  was transferred through a Teflon tube into a FEP bottle under an  $\text{N}_2$  atmosphere. It should be carefully handled with Teflon equipment in a bench hood. Measured the amount of  $\text{IF}_5$  (0.25 ml, 3.6 mmol) in the PFA syringe was quickly transferred into the bottle of starting material and added slowly under  $\text{N}_2$  protected at room temperature. The mixture was stirred at  $65^\circ\text{C}$  for 14 h, then poured into cooled water, neutralized with aq.  $\text{NaHCO}_3$ , and extracted with  $\text{CH}_2\text{Cl}_2$  (5 ml  $\times$  3). The combined organic phase was dried over  $\text{MgSO}_4$ , filtered and evaporated under vacuum in the ice bath. The crude was purified by silica chromatography, eluting with pentane/ $\text{CH}_2\text{Cl}_2$  to give arylsulfur pentafluoride.

### Method B

Crude arylsulfur chlorotetrafluoride (0.72 mmol) was placed into FEP bottle in the glove box. From a cylinder,  $\text{IF}_5$  was transferred through a Teflon tube into a FEP bottle under an  $\text{N}_2$  atmosphere. It should be carefully handled with Teflon equipment in a bench hood. Measured the amount of  $\text{IF}_5$  (0.15 ml, 2.16 mmol) in the PFA syringe was quickly transferred into the bottle of starting material and added slowly under  $\text{N}_2$  protected at room temperature. The mixture was stirred at  $65^\circ\text{C}$  for 14 h, then poured into cooled water, neutralized with aq.  $\text{NaHCO}_3$ , and extracted with  $\text{CH}_2\text{Cl}_2$  (5 ml  $\times$  3). The combined organic phase was dried over  $\text{MgSO}_4$ , filtered and evaporated under vacuum in the ice bath. The crude was purified by silica chromatography, eluting with pentane/ $\text{CH}_2\text{Cl}_2$  to give arylsulfur pentafluoride.

### Method C

Crude arylsulfur chlorotetrafluoride (0.72 mmol) was placed into FEP bottle in the glove box. From a cylinder,  $\text{IF}_5$  was transferred through a Teflon tube into a FEP bottle under an  $\text{N}_2$  atmosphere. It should be carefully handled with Teflon equipment in a bench hood. Measured the amount of  $\text{IF}_5$  (0.010 ml, 0.144 mmol) in the PFA syringe was quickly transferred into the bottle of starting material and added slowly under  $\text{N}_2$  protected at room temperature. The mixture was stirred at room

temperature for 5 – 24 h, then poured into cooled water, neutralized with aq.  $\text{NaHCO}_3$ , and extracted with  $\text{CH}_2\text{Cl}_2$  (5 ml  $\times$  3). The combined organic phase was dried over  $\text{MgSO}_4$ , filtered and evaporated under vacuum in the ice bath. The crude was purified by silico chromatography, eluting with pentane/ $\text{CH}_2\text{Cl}_2$  to give arylsulfur pentafluoride.

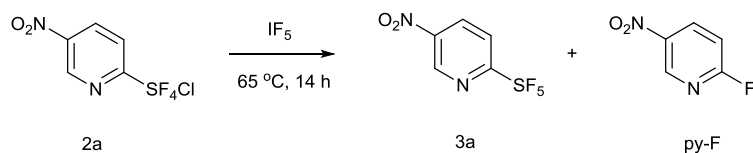

Condition: 2a (192 mg, 0.72 mmol), 65 °C, 14 h. [a] Yield determined by <sup>19</sup>F NMR with fluorobenzene as internal standard.

**Figure S1.** Competitive relationship between 3a and Py-F byproduct

### Procedure I<sup>1, 2, 3</sup>

An oven-dried 60 ml FEP bottle with magnetic stirring bar was charged with aryl sulfur (5.3 mmol), anhydrous spray dried KF (2.77 g, 47.7 mmol) and anhydrous MeCN (20 ml) inside the glove box. The bottle was cooled in an ice/water bath while chlorine gas was bubbled through the stirred reaction mixture for approximately 5 minutes. The bottle was sealed and the reaction mixture was stirred at room temperature overnight. After reaction was complete, solution was filtrated under N<sub>2</sub>

to another 60 ml FEP bottle using a PP/ETFE filter. The residue was washed with Hexane (5 ml×2). The solvent was evaporated in vacuo to give arylsulfur chlorotetrafluorides.

**5. Table S2. The procedure, yields, appearance and  $^{19}\text{F}$  NMR data of arylsulfur chlorotetrafluorides 2a-p<sup>1,2</sup>**

| Entry | Structure                                                                           | Procedure       | Yield <sup>a</sup> | Appearance | $^{19}\text{F}$ NMR ( $\text{CDCl}_3$ ; $\delta_{\text{F}}$ , ppm) |
|-------|-------------------------------------------------------------------------------------|-----------------|--------------------|------------|--------------------------------------------------------------------|
| 2a    | 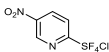   | I               | 82%                | solid      | 127.99 (s, 4F).                                                    |
| 2b    |    | I               | 69%                | solid      | 123.39 (s, 4F), -63.12 (s, 3F)                                     |
| 2c    |    | I               | 75%                | solid      | 127.99 (s, 4F)                                                     |
| 2d    |    | I               | 91%                | solid      | 128.14 (s, 4F)                                                     |
| 2e    |    | I               | 77%                | oil        | 138.96 (s, 4F), -61.70 (s, 1F)                                     |
| 2f    |    | I               | 73%                | oil        | 134.63 (s, 4F), -68.35 (s, 1F)                                     |
| 2g    |    | I               | 90%                | oil        | 132.28 (s, 4F), -63.35 (s, 2F)                                     |
| 2h    |  | I               | 70%                | oil        | 120.05 (s, 4F)                                                     |
| 2i    |  | I               | 67%                | oil        | 127.35 (s, 4F)                                                     |
| 2j    |  | I <sup>b</sup>  | 87%                | solid      | 134.98 (s, 4F)                                                     |
| 2k    |  | I <sup>b</sup>  | 84%                | solid      | 135.75 (s, 4F)                                                     |
| 2l    |  | II              | 71%                | oil        | 137.56 (s, 4F)                                                     |
| 2m    |  | II <sup>c</sup> | 80%                | solid      | 135.88 (s, 4F).                                                    |
| 2n    |  | II              | 81%                | oil        | $\delta$ 136.79 (s, 4F)                                            |
| 2o    |  | II              | 75%                | oil        | 137.11 (s, 4F)                                                     |
| 2p    |  | II              | 79%                | oil        | 136.04 (s, 4F)                                                     |

[a] crude yield, with purities in the range of 80-95% determined by  $^{19}\text{F}$  NMR. [b] overnight. [c] aryl sulfur (5.3 mmol), dried CsF (4.78 g, 53 mmol) and anhydrous MeCN (20 ml), rt, 24 h.

**6. Table S3. Optimizing of the Cl-F exchange reactions of 2c.**

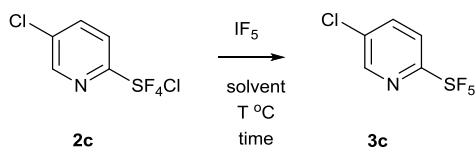

| Entry          | IF <sub>5</sub> (equiv) | T (°C) | Time (h) | Solvent | Yield <sup>a</sup> |
|----------------|-------------------------|--------|----------|---------|--------------------|
| 1              | 0.5                     | 65     | 24       | neat    | trace              |
| 2              | 1                       | 65     | 24       | neat    | trace              |
| 3              | 2                       | 65     | 24       | neat    | 51                 |
| 4 <sup>b</sup> | 3                       | 65     | 14       | neat    | 70                 |

Condition: 2c (69 mg, 0.288 mmol). [a] Yield determined by <sup>19</sup>F NMR with fluorobenzene as internal standard. [b] Using 2c (148 mg, 0.72 mmol).

**7. Table S4. Optimizing of the Cl-F exchange reactions of 2d.**

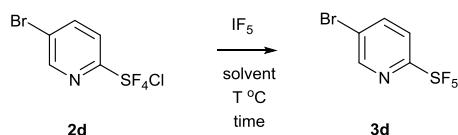

| Entry          | IF <sub>5</sub> (equiv) | T (°C) | Time (h) | Solvent | Yield <sup>a</sup> |
|----------------|-------------------------|--------|----------|---------|--------------------|
| 1              | 0.5                     | 65     | 24       | neat    | trace              |
| 2              | 1                       | 65     | 24       | neat    | trace              |
| 3              | 2                       | 65     | 48       | neat    | 63                 |
| 4 <sup>b</sup> | 3                       | 65     | 14       | neat    | 80                 |

Condition: 2d (87 mg, 0.288 mmol). [a] Yield determined by <sup>19</sup>F NMR with fluorobenzene as internal standard. [b] Using 2d (216 mg, 0.72 mmol).

**8. Table S5. Optimizing of the Cl-F exchange reactions of 2e.**

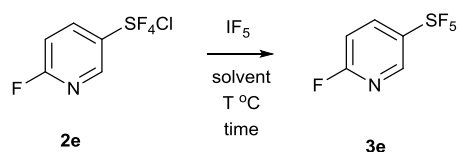

| Entry | IF <sub>5</sub> (equiv) | T (°C) | Time (h) | Solvent | Yield <sup>a</sup> |
|-------|-------------------------|--------|----------|---------|--------------------|
| 1     | 0.5                     | 70     | 24       | neat    | 2                  |
| 2     | 1.2                     | 70     | 24       | neat    | 60                 |
| 3     | 2                       | 70     | 48       | neat    | 81                 |
| 4     | 3                       | 65     | 14       | neat    | 97                 |

Condition: 2e (173 mg, 0.72 mmol). [a] Yield determined by <sup>19</sup>F NMR with fluorobenzene as internal standard.

**9. Table S6. Optimizing of the Cl-F exchange reactions of 2n.**

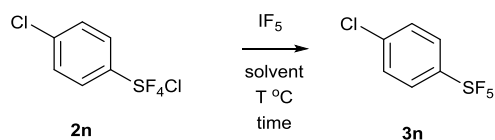

| Entry          | IF <sub>5</sub> (equiv) | T (°C) | Time (h) | Solvent | Yield <sup>a</sup> |
|----------------|-------------------------|--------|----------|---------|--------------------|
| 1 <sup>b</sup> | 3                       | 65     | 1        | neat    | 19                 |
| 2 <sup>b</sup> | 1                       | rt     | 2        | neat    | 70                 |
| 3 <sup>b</sup> | 0.5                     | rt     | 2        | neat    | 86                 |
| 4 <sup>b</sup> | 0.3                     | rt     | 2        | neat    | 93                 |
| 5              | 0.2                     | rt     | 12       | neat    | 92                 |

Condition: 2n (184 mg, 0.72 mmol). [a] Yield determined by <sup>19</sup>F NMR with fluorobenzene as internal standard. [b] Excess IF<sub>5</sub> induced chlorination of 3n.

#### 10. Table S7. Optimizing of the Cl-F exchange reaction of 2l

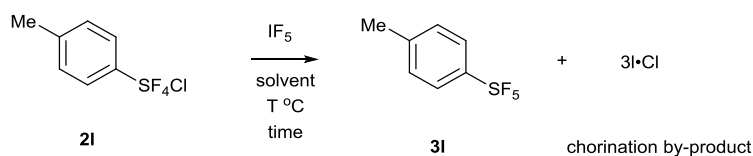

| entry | IF <sub>5</sub> (equiv) | T (°C) | Time (h) | Solvent | Yield <sup>a</sup> |          |
|-------|-------------------------|--------|----------|---------|--------------------|----------|
|       |                         |        |          |         | 3l                 | 3l:3l·Cl |
| 1     | 0.2                     | rt     | 5        | neat    | 35                 | 23       |
| 2     | 0.2                     | rt     | 12       | neat    | 42                 | 2.3      |
| 3     | 0.2                     | 0      | 4        | neat    | 27                 | 22       |
| 4     | 0.2                     | 0      | 8        | neat    | 49                 | 8        |

Condition: 2l (170 mg, 0.72 mmol). [a] Yield determined by <sup>19</sup>F NMR with fluorobenzene as internal standard.

#### 11. Table S8. Time course of the reaction process of 2a.

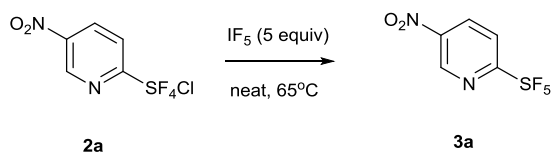

| Entry | Time (h) | Yield <sup>a</sup> |
|-------|----------|--------------------|
| 1     | 1        | 12                 |
| 2     | 3        | 21                 |
| 3     | 4        | 73                 |
| 4     | 6        | 95                 |
| 5     | 8        | 97                 |

Condition: 2a (38 mg, 0.144 mmol), IF<sub>5</sub> (0.05 ml, 0.721 mmol), 65 °C. [a] Yield determined by <sup>19</sup>F NMR with fluorobenzene as internal standard.

#### 12. Table S9. Time course of the reaction process of 2n.

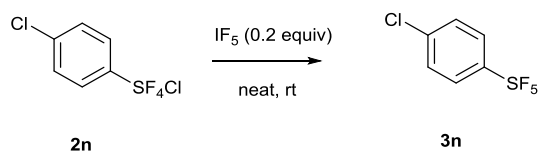

| Entry | Time (h) | Yield <sup>a</sup> |
|-------|----------|--------------------|
| 1     | 3        | 2                  |
| 2     | 6        | 6                  |
| 3     | 9        | 68                 |
| 4     | 11       | 88                 |
| 5     | 12       | 92                 |

Condition: 2n (184 mg, 0.72 mmol), IF<sub>5</sub> (10  $\mu$ l, 0.144 mmol), rt. [a] Yield determined by <sup>19</sup>F NMR with fluorobenzene as internal standard.

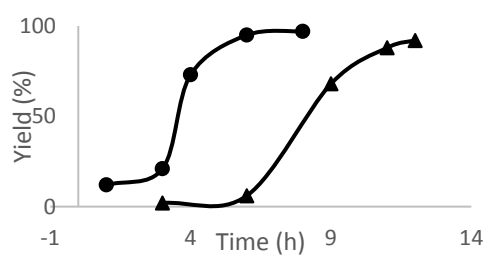

**Figure S2.** Time course of the yields of **3a** and **3n** in the reaction of IF<sub>5</sub> with **2a** and **2n** (●, **3a**; ▲, **3n**).

### 13. EPS of IF<sub>5</sub> and Py-*o*-SF<sub>4</sub>Cl by DFT computation

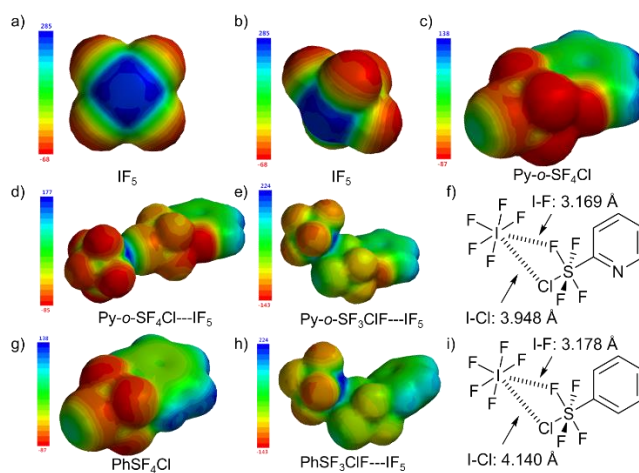

**Figure S3.** DFT calculations of IF<sub>5</sub> (a,b), py-*o*-SF<sub>4</sub>Cl (c), a complex [IF<sub>5</sub>/Py-*o*-SF<sub>4</sub>Cl] (e), PhSF<sub>4</sub>Cl (g) and a complex [IF<sub>5</sub>/Ph-SF<sub>4</sub>Cl] (h) by B3LYP/6-311+G(*d,p*) except a complex [IF<sub>5</sub>/Py-*o*-SF<sub>4</sub>Cl] (d) by B3LYP/6-31G(d).

### 14. General Procedure for Synthesis of disulfides

#### Method E<sup>1</sup>

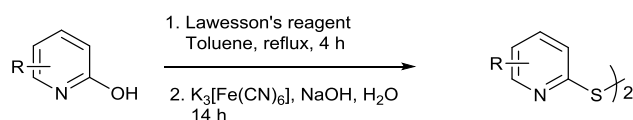

The solution of 2-pyridone (21.5 mmol) and Lawesson's reagent (5.22 g, 12.9 mmol) in anhydrous toluene (107 ml) was stirred at reflux for 14 h. After cooling, NaOH (5N, 10 ml) solution was added to the reaction mixture. The aqueous layer was separated and washed with  $Et_2O$  (30 ml). The organic phases were discarded, and the aqueous phase was acidified with HCl aqueous (2N) to pH 2-3, and extracted with  $CH_2Cl_2$  (3×20 ml). The combined organic phases were washed with brine and dried with  $MgSO_4$ . The crude residue that was obtained after filtration and  $CH_2Cl_2$  was evaporated in vacuo to give pyridine-2-thiol. Not further purify and directly continue the next step. Added crude pyridine-2-thiol to the solution of NaOH (1.03g, 25.5 mmol) in water (43 ml) was stirred for 30 min. Then  $K_3[Fe(CN)_6]$  ( 8.49 g, 25.8 mmol) in water (57 ml) was dropwise added and stirred at room temperature for overnight. The formed precipitate was filtered, washed with water and dried in vacuo to give disulfide.

#### Method F<sup>1</sup>

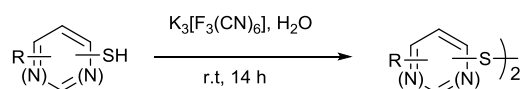

To aromatic thiol (9.7 mmol) was added solution of NaOH ( 0.46 g, 11.6 mmol) in water (19 ml) and it was stirred for 30 minutes and after a solution of  $K_3[Fe(CN)_6]$  (3.82 g, 11.6 mmol) in water (25 ml) was added to it. The reaction mixture was stirred for 14 h, precipitate formed was filtered, washed with water and dried in vacuo to give disulfide.

#### Method G

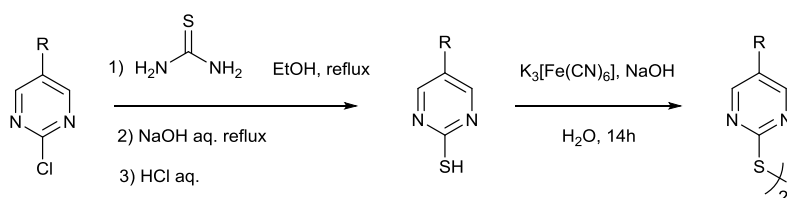

The solution of substituted 2-chloropyrimidine (2.4 mmol) and thiocarbamide (0.365 g, 4.8 mmol) in ethanol (5 ml) was stirred and heated at reflux overnight. Upon completion, aqueous NaOH (0.24 g, 6.0 mmol) solution was added and heated at reflux for 2 h. Cooling to room temperature, the ethanol was evaporated in vacuo and the residue was washed with  $Et_2O$  (2 ml×3). The aqueous was acidified with HCl aqueous (2 N) to pH 2-3, precipitate formed was filtered, washed with water and dried in vacuo to give 5-substituted pyrimidine-2-thiol. Not further purify and directly continue the next step. Added crude 5-substituted pyrimidine-2-thiol to the solution of NaOH (0.115 g, 2.88 mmol) in water (3 ml) was stirred for 30 min. Then  $K_3[Fe(CN)_6]$  ( 0.948 g, 2.88 mmol) in water (5 ml) was added dropwise and stirred at room temperature overnight. The formed precipitate was filtered, washed with water and dried in vacuo to give pure disulfide as a crystalline solid.

#### Method H



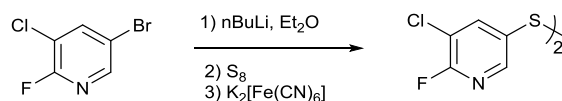

To solution of 2-fluoro-3-chloro-5-bromopyridine (1.96 g, 9.3 mmol) in Et<sub>2</sub>O (45 ml), *n*BuLi (6.4ml, 9.3 mmol, 1.45 M solution in Hexene) was added drop wise at -78 °C, after which it was stirred for an additional half hour. Powdered elemental sulfur (0.328 g, 10.23 mmol) in Toluene (16 ml) was then added in portions and maintained at -78 °C for 30 min. It was then allowed to room temperature with stirring under nitrogen overnight. Reaction mixture was poured to a solution of K<sub>3</sub>[Fe(CN)<sub>6</sub>] (3.67 g, 11.16 mmol) in water (50 ml) and stirred at room temperature over 2 h. For workup, organic layer was separated and aqueous phase was extracted with EtOAc (3×30 ml). Combined organic phase was washed with brine, dried over anhydrous MgSO<sub>4</sub>, filtered, and solvent was evaporated. The crude was purified by flash column chromatography (hexane/EtOAc, 50/1) to give white solid.

### 15. General Procedure of synthesis of 2-chloropyrimidines

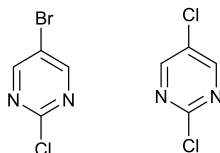

2-chloropyrimidines were prepared according to the literature procedures.<sup>4</sup>

### 16. Preparation of Compounds

#### 2,2'-bis(5-nitropyridyl)disulfide

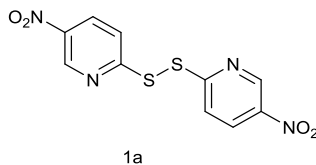

Prepared following Method E. Recrystallized from ethanol. Yield 2.668 g, 80%. khaki crystalline solid. Mp 133-135 °C. <sup>1</sup>H NMR (300 MHz, CDCl<sub>3</sub>) δ 9.29 (s, 1H), 8.41 (d, *J* = 6.9 Hz, 1H), 7.73 (d, *J* = 8.8 Hz, 1H). <sup>13</sup>C NMR (126 MHz, CDCl<sub>3</sub>) δ 165.10, 145.48, 142.81, 132.27, 119.95, 77.41, 77.16, 76.91. IR (KBr, cm<sup>-1</sup>): 3088, 1590, 1563, 1519, 1343, 1100, 855, 748. HRMS (TOF/EI<sup>+</sup>): Calculated for C<sub>10</sub>H<sub>6</sub>N<sub>4</sub>O<sub>4</sub>S<sub>2</sub><sup>+</sup>: 309.9830, found: 309.9820.

#### 2,2'-bis(5-trifluoromethylpyridyl)disulfide

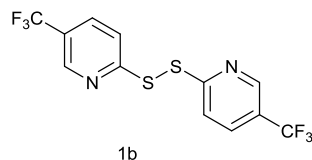

Prepared following Method E. Flash column chromatography: Hexane/AcOEt 6:1. Yield 2.834 g, 74%. White solid. <sup>1</sup>H NMR (300 MHz, CDCl<sub>3</sub>) δ 8.74 (s, 2H), 7.85 (d, *J* = 8.4 Hz, 2H), 7.71 (d, *J* = 8.4 Hz, 2H). <sup>19</sup>F NMR (282 MHz, CDCl<sub>3</sub>) δ -62.28 (s, 6F).

#### 2,2'-bis(5-chloropyridyl)disulfide

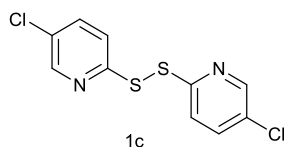

Prepared following Method E. Flash column chromatography: Hexane/AcOEt 6:1. Yield 2.332 g, 75%. White solid.  $^1\text{H}$  NMR (300 MHz,  $\text{CDCl}_3$ )  $\delta$  8.43 (d,  $J = 1.5$  Hz, 2H), 7.57 (dd,  $J = 4.5, 1.5$  Hz, 4H).

**2,2'-bis(5-bromopyridin-2-yl)disulfide**

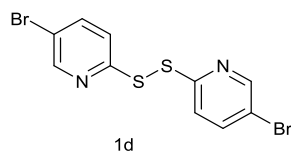

Prepared following Method E. Flash column chromatography: Hexane/AcOEt 6:1. Yield 2.723 g, 67%. White solid.  $^1\text{H}$  NMR (300 MHz,  $\text{CDCl}_3$ )  $\delta$  8.52 (d,  $J = 2.3$  Hz, 2H), 7.73 (dd,  $J = 8.5, 2.1$  Hz, 2H), 7.50 (d,  $J = 8.6$  Hz, 2H).

**3,3'-bis(6-fluoropyridin-2-yl)disulfide**

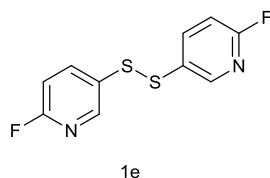

1e was prepared according to the literature procedures<sup>3</sup>. Yield 1.46 g, 57%. White solid.  $^1\text{H}$  NMR (300 MHz,  $\text{CDCl}_3$ )  $\delta$ : 8.26 (s, 2H), 7.91 (t,  $J = 6.6$  Hz, 2H), 6.96 (dd,  $J = 8.0, 2.1$  Hz, 2H).  $^{19}\text{F}$  NMR (282 MHz,  $\text{CDCl}_3$ )  $\delta$ : -67.46 (s, 2F).

**3,3'-bis(5-chloro-6-fluoropyridin-2-yl)disulfide**

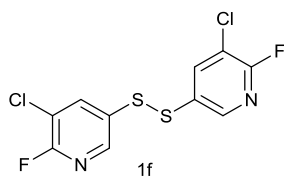

Prepared following Method H. Flash column chromatography: Hexane/AcOEt 50:1. Yield 0.76 g, 50%. White solid. Mp 79-81 °C.  $^1\text{H}$  NMR (300 MHz,  $\text{CDCl}_3$ )  $\delta$  8.14-8.13 (m, 2H), 7.95 (dd,  $J = 8.1, 2.3$  Hz, 2H).  $^{19}\text{F}$  NMR (282 MHz,  $\text{CDCl}_3$ )  $\delta$  -70.20 (d,  $J = 7.3$  Hz).  $^{13}\text{C}$  NMR (126 MHz,  $\text{CDCl}_3$ )  $\delta$  160.12 (s), 158.20 (s), 146.18 (d,  $J = 14.0$  Hz), 142.35 (d,  $J = 2.5$  Hz), 131.55 (d,  $J = 5.2$  Hz), 118.58 (d,  $J = 35.3$  Hz). IR (KBr,  $\text{cm}^{-1}$ ): 3040, 1564, 1441, 1366, 1258, 1071, 727. HRMS (TOF/EI+): Calculated for  $\text{C}_{10}\text{H}_4\text{Cl}_2\text{F}_2\text{N}_2\text{S}_2^+$ : 323.9161, found: 323.9182.

**4,4'-bis(2,6-difluoropyridin-3-yl)disulfide**

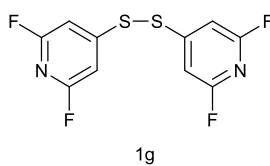

1h was prepared according to the literature procedures<sup>3</sup>.  $^1\text{H}$  NMR (300 MHz,  $\text{CDCl}_3$ )  $\delta$  6.92 (s, 4H).  $^{19}\text{F}$  NMR (282 MHz,  $\text{CDCl}_3$ )  $\delta$  -66.69 (s, 4F).

**2,2'-bis(5-chloropyrimidin-2-yl)disulfide**

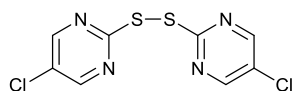

1h

Prepared following Method G. Yield 0.22 g, 63%. Yellowish solid. Mp 201-204 °C.  $^1\text{H}$  NMR (300 MHz,  $\text{CDCl}_3$ )  $\delta$  8.53 (s, 4H).  $^{13}\text{C}$  NMR (126 MHz,  $\text{CDCl}_3$ )  $\delta$  167.22, 156.46, 128.91, 77.41, 77.16, 76.91. IR (KBr,  $\text{cm}^{-1}$ ): 3036, 1630, 1534, 1375, 1251, 1177, 759. HRMS (TOF/EI+): Calculated for  $\text{C}_8\text{H}_4\text{Cl}_2\text{N}_4\text{S}_2^+$ : 289.9254, found: 289.9256.

### 2,2'-bis(5-bromopyrimidin-2-yl)disulfide

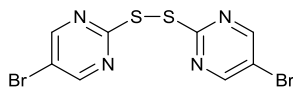

1i

Prepared following Method G. Yield 0.237 g, 52%. White solid.  $^1\text{H}$  NMR (300 MHz,  $\text{CDCl}_3$ )  $\delta$  8.61 (s, 4H).  $^{13}\text{C}$  NMR (126 MHz,  $\text{CDCl}_3$ )  $\delta$  167.71, 158.55, 117.45, 77.41, 77.16, 76.91. IR (KBr,  $\text{cm}^{-1}$ ): 3023, 1637, 1529, 1383, 1178, 1165, 1108, 762. HRMS (TOF/EI+): Calculated for  $\text{C}_8\text{H}_4\text{Br}_2\text{N}_4\text{S}_2^+$ : 377.8244, found: 379.8231.

### 1,1'-bis(4-dinitrophenyl)disulfide

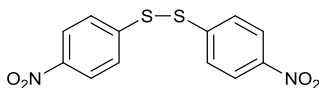

1j

Prepared following Method F. Yield 1.435 g, 96%. Brown solid.  $^1\text{H}$  NMR (300 MHz,  $\text{CDCl}_3$ )  $\delta$  8.20 (d,  $J = 8.7$  Hz, 4H), 7.62 (d,  $J = 8.7$  Hz, 4H).

### 5-chloro-2-pyrimidinamine

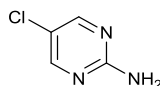

To a solution of 2-aminopyridine (3 g, 31.5 mmol) in MeCN (60 ml) cooled in an ice bath was added *N*-chlorosuccinimide, then the reaction mixture was heated reflux overnight. The solution was evaporated after the completion of reaction. The residue obtained was washed with  $\text{NaHCO}_3$  aqueous and water, filtered and dried under vacuum to give 3.85 g, 94% yield of 5-chloro-2-pyrimidinamine as white solid.  $^1\text{H}$  NMR (300 MHz,  $\text{CDCl}_3$ )  $\delta$  8.24 (s, 2H), 5.05 (s, 2H).

### 5-bromo-2-pyrimidinamine

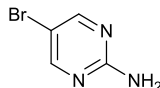

To a solution of 2-aminopyridine (5 g, 53.1 mmol) in MeCN (80 ml) cooled in an ice bath was added *N*-bromosuccinimide, then the reaction mixture was stirred at room temperature overnight. The solution was evaporated after the completion of reaction. The residue obtained was washed with  $\text{NaHCO}_3$  aqueous and water, filtered and dried under vacuum to give 8.64 g, 94% yield of 5-bromo-2-pyrimidinamine as white solid.  $^1\text{H}$  NMR (300 MHz,  $\text{CDCl}_3$ )  $\delta$  8.31 (s, 2H).

### 2-(chlorotetrafluoro- $\lambda^6$ -sulfanyl)-5-nitropyridine

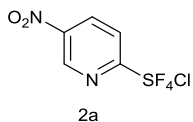

Prepared following Procedure I. Yield 0.792 g, 79%. Yellow solid.  $^1\text{H}$  NMR (300 MHz,  $\text{CDCl}_3$ )  $\delta$  9.38 (d,  $J = 2.4$  Hz, 1H), 8.70 (d,  $J = 8.7$  Hz, 1H), 7.98 (d,  $J = 8.9$  Hz, 1H).  $^{19}\text{F}$  NMR (282 MHz,  $\text{CDCl}_3$ )  $\delta$  127.99 (s, 4F).

**(4-chlorophenyl)chlorotetrafluoro- $\lambda^6$ -sulfane**

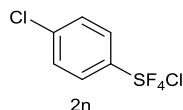

Prepared following Procedure II. Yield 1.974 g, 73%. Colorless oil.  $^1\text{H}$  NMR (300 MHz,  $\text{CDCl}_3$ )  $\delta$  7.68 (d,  $J = 9.0$  Hz, 2H), 7.43 (d,  $J = 8.6$  Hz, 2H).  $^{19}\text{F}$  NMR (282 MHz,  $\text{CDCl}_3$ )  $\delta$  136.79 (s, 4F).

**5-nitro-2-(pentafluoro- $\lambda^6$ -sulfanyl)pyridine**

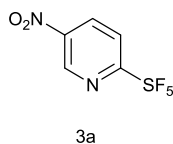

Prepared following Method A. Flash column chromatography: Pentane/DCM 3:1. Yield 0.158 g, 88%. Yellow solid. Mp 43-45 °C.  $^1\text{H}$  NMR (300 MHz,  $\text{CDCl}_3$ )  $\delta$  9.41 (s, 1H), 8.72 (d,  $J = 8.5$  Hz, 1H), 8.01 (d,  $J = 9.0$  Hz, 1H).  $^{19}\text{F}$  NMR (282 MHz,  $\text{CDCl}_3$ )  $\delta$  76.15 – 73.79 (m, 1F), 52.51 (d,  $J = 150.9$  Hz, 4F).  $^{13}\text{C}$  NMR (126 MHz,  $\text{CDCl}_3$ )  $\delta$  168.16 (p,  $J = 25.2$  Hz), 145.37 (s), 144.03 (s), 134.25 (s), 122.52 (p,  $J = 3.9$  Hz). IR (KBr,  $\text{cm}^{-1}$ ): 3061, 1982, 1602, 1528, 1455, 1369, 1297, 1018, 835. HRMS (TOF/EI+): Calculated for  $\text{C}_5\text{H}_3\text{F}_5\text{N}_2\text{O}_2\text{S}^+$ : 249.9835, found: 249.9842.

**2-(pentafluoro- $\lambda^6$ -sulfanyl)-5-(trifluoromethyl)pyridine**

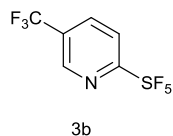

Prepared following Method A. Flash column chromatography: Pentane/DCM 3:1. Yield 0.159 g, 81%. Colorless liquid.  $^1\text{H}$  NMR (300 MHz,  $\text{CDCl}_3$ )  $\delta$  8.88 (s, 1H), 8.19 (d,  $J = 8.1$  Hz, 1H), 7.93 (d,  $J = 8.6$  Hz, 1H).  $^{19}\text{F}$  NMR (282 MHz,  $\text{CDCl}_3$ )  $\delta$  77.10 – 74.48 (m, 1F), 51.87 (d,  $J = 150.4$  Hz, 4F), -63.14 (s, 3F).  $^{13}\text{C}$  NMR (126 MHz,  $\text{CDCl}_3$ )  $\delta$  167.92 – 166.99 (m), 145.54 (d,  $J = 1.9$  Hz), 136.30 (d,  $J = 3.3$  Hz), 129.71 (q,  $J = 33.9$  Hz), 122.34 (d,  $J = 273.2$  Hz), 121.94 – 121.44 (m). IR (KBr,  $\text{cm}^{-1}$ ): 3125, 3082, 1603, 1580, 1471, 1386, 1329, 1180, 1147, 1080, 1014, 854. HRMS (TOF/EI+): Calculated for  $\text{C}_6\text{H}_3\text{F}_8\text{NS}^+$ : 272.9858, found: 272.9857.

**5-chloro-2-(pentafluoro- $\lambda^6$ -sulfanyl)pyridine**

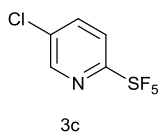

Prepared following Method B. Flash column chromatography: Pentane/DCM 3:1. Yield 97 mg, 56%. Colorless liquid.  $^1\text{H}$  NMR (300 MHz,  $\text{CDCl}_3$ )  $\delta$  8.54 (d,  $J = 2.3$  Hz, 1H), 7.95 – 7.85 (m, 1H), 7.73 (d,  $J = 8.7$  Hz, 1H).  $^{19}\text{F}$  NMR (282 MHz,  $\text{CDCl}_3$ )  $\delta$  78.80 – 76.44 (m, 1F), 53.24 (d,  $J = 150.3$  Hz, 4F).

**5-bromo-2-(pentafluoro- $\lambda^6$ -sulfanyl)pyridine**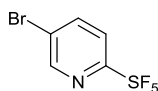

3d

Prepared following Method B. Flash column chromatography: Pentane/DCM 3:1. Yield 0.139 g, 68%. Colorless liquid.  $^1\text{H}$  NMR (300 MHz,  $\text{CDCl}_3$ )  $\delta$  8.65 (d,  $J = 2.2$  Hz, 1H), 8.11 – 8.00 (m, 1H), 7.67 (d,  $J = 8.6$  Hz, 1H).  $^{19}\text{F}$  NMR (282 MHz,  $\text{CDCl}_3$ )  $\delta$  78.89 – 76.25 (m, 1F), 53.14 (d,  $J = 150.3$  Hz, 4F).

**2-fluoro-5-(pentafluoro- $\lambda^6$ -sulfanyl)pyridine**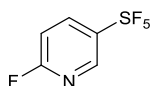

3e

Prepared following Method B. Yield 0.114 g, 71%. Colorless liquid.  $^1\text{H}$  NMR (300 MHz,  $\text{CDCl}_3$ )  $\delta$  8.64 (s, 1H), 8.34 – 8.09 (m, 1H), 7.05 (dd,  $J = 8.9, 3.1$  Hz, 1H).  $^{19}\text{F}$  NMR (282 MHz,  $\text{cdcl}_3$ )  $\delta$  83.43 – 79.55 (m), 65.36 (d,  $J = 151.4$  Hz), -62.12 (s).

**3-chloro-2-fluoro-5-(pentafluoro- $\lambda^6$ -sulfanyl)pyridine**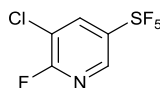

3f

Prepared following Method B. Flash column chromatography: Pentane/DCM 1:1. Yield 83 mg, 45%. Colorless liquid.  $^1\text{H}$  NMR (300 MHz,  $\text{CDCl}_3$ )  $\delta$  8.53 (s, 1H), 8.22 (dd,  $J = 7.6, 2.4$  Hz, 1H).  $^{19}\text{F}$  NMR (282 MHz,  $\text{CDCl}_3$ )  $\delta$  81.55 – 79.30 (m, 1F), 66.12 (d,  $J = 151.9$  Hz, 4F), -64.26 (s, 1F).  $^{13}\text{C}$  NMR (126 MHz,  $\text{CDCl}_3$ )  $\delta$  159.48 (d,  $J = 255.6$  Hz), 148.49 – 147.74 (m), 143.49 – 143.10 (m), 139.10 – 138.78 (m), 118.07 (d,  $J = 35.3$  Hz). IR (KBr,  $\text{cm}^{-1}$ ): 1713, 1578, 1458, 1392, 1269, 1129, 1076, 825. HRMS (TOF/EI+): Calculated for  $\text{C}_5\text{H}_2\text{ClF}_6\text{NS}^+$ : 256.9501, found: 256.9490.

**2,6-difluoro-4-(pentafluoro- $\lambda^6$ -sulfanyl)pyridine**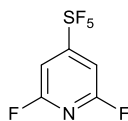

3g

Crude pyridylsulfur chlorotetrafluoride (1.26 g, 4.9 mmol) was placed into FEP bottle in the glove box. From a cylinder,  $\text{IF}_5$  was transferred through a Teflon tube into a FEP bottle under an  $\text{N}_2$  atmosphere. Measured the amount of  $\text{IF}_5$  (0.51 ml, 7.35 mmol) in the PFA syringe was quickly transferred into the bottle of starting material and added slowly under  $\text{N}_2$  protected at room temperature. The mixture was stirred at 65  $^\circ\text{C}$  for 14 h. Workup was conducted as it is shown in Method B. Flash column chromatography: Pentane/DCM 1:1. Yield 0.236 g, 20%. Colorless liquid.  $^1\text{H}$  NMR (300 MHz,  $\text{CDCl}_3$ )  $\delta$  7.22 (s, 2H).  $^{19}\text{F}$  NMR (282 MHz,  $\text{CDCl}_3$ )  $\delta$  78.86 – 75.42 (m, 1F), 60.91 (d,  $J = 151.4$  Hz, 4F), -63.14 (s, 2F).

**5-chloro-2-(pentafluoro- $\lambda^6$ -sulfanyl)pyrimidine**

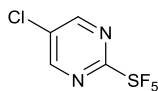

3h

Prepared following Method A. Flash column chromatography: Pentane/DCM 3:1. Yield 47 mg, 27%. White solid. Mp 57-60 °C. <sup>1</sup>H NMR (300 MHz, CDCl<sub>3</sub>) δ 8.85 (s, 2H). <sup>19</sup>F NMR (282 MHz, CDCl<sub>3</sub>) δ 74.75 – 71.58 (m, 1F), 48.47 (d, *J* = 152.1 Hz, 4F). <sup>13</sup>C NMR (126 MHz, CDCl<sub>3</sub>) δ 170.08 – 165.56 (m), 157.03 (s), 134.04 (s). IR (KBr, cm<sup>-1</sup>): 2960, 1676, 1554, 1449, 1397, 1368, 1134, 855, 774. Calculated for C<sub>4</sub>H<sub>2</sub>ClF<sub>5</sub>N<sub>2</sub>S<sup>+</sup>: 239.9547, found: 239.9572.

**5-bromo-2-(pentafluoro-λ<sup>6</sup>-sulfanyl)pyrimidine**

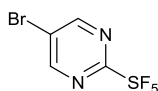

3i

Prepared following Method A. Flash column chromatography: Pentane/DCM 3:1. Yield 86 mg, 42%. White solid. Mp 78-79 °C. <sup>1</sup>H NMR (300 MHz, CDCl<sub>3</sub>) δ 8.95 (s, 2H). <sup>19</sup>F NMR (282 MHz, CDCl<sub>3</sub>) δ 74.57 – 71.71 (m, 1F), 48.41 (d, *J* = 152.0 Hz, 4F). <sup>13</sup>C NMR (126 MHz, CDCl<sub>3</sub>) δ 169.38 – 167.48 (m), 159.29 (s), 123.02 (s). IR (KBr, cm<sup>-1</sup>): 2913, 1553, 1394, 1367, 1270, 1188, 840. HRMS (TOF/EI<sup>+</sup>): Calculated for C<sub>4</sub>H<sub>2</sub>BrF<sub>5</sub>N<sub>2</sub>S<sup>+</sup>: 283.9042, found: 283.9056.

**(4-nitrophenyl)pentafluoro-λ<sup>6</sup>-sulfane**

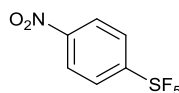

3j

Prepared following Method B. Flash column chromatography: Pentane/DCM 3:1. Yield 0.134 g, 75%. Yellowish liquid. <sup>1</sup>H NMR (300 MHz, CDCl<sub>3</sub>) δ 8.35 (d, *J* = 8.5 Hz, 2H), 7.98 (d, *J* = 8.7 Hz, 2H). <sup>19</sup>F NMR (282 MHz, CDCl<sub>3</sub>) δ 81.96 – 79.35 (m, 1F), 62.15 (d, *J* = 150.7 Hz, 4F).

**(3-nitrophenyl)pentafluoro-λ<sup>6</sup>-sulfane**

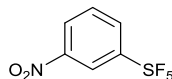

3k

Prepared following Method B. Flash column chromatography: Pentane/DCM 3:1. Yield 0.147 g, 82%. <sup>1</sup>H NMR (300 MHz, CDCl<sub>3</sub>) δ 8.66 (s, 1H), 8.42 (d, *J* = 8.0 Hz, 1H), 8.11 (d, *J* = 8.2 Hz, 1H), 7.73 (t, *J* = 8.2 Hz, 1H). <sup>19</sup>F NMR (282 MHz, CDCl<sub>3</sub>) δ 81.79 – 79.42 (m), 62.35 (d, *J* = 150.9 Hz).

***p*-tolylpentafluoro-λ<sup>6</sup>-sulfane**

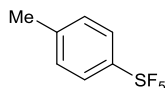

3l

Prepared following Method C, reaction time for 5 h, yield 44 mg, 28%. Flash column chromatography: Pentane. Colorless liquid. <sup>1</sup>H NMR (300 MHz, CDCl<sub>3</sub>) δ 7.62 (d, *J* = 8.5 Hz, 2H), 7.24 (d, *J* = 8.1 Hz, 2H), 2.39 (s, 3H). <sup>19</sup>F NMR (282 MHz, CDCl<sub>3</sub>) δ 87.42 – 82.88 (m), 62.66 (d, *J* = 149.9 Hz). <sup>13</sup>C NMR (126 MHz, CDCl<sub>3</sub>) δ 153.38 – 149.00 (m), 142.19 (s), 129.32 (s), 125.95 (p, *J* =

4.6 Hz), 21.28 (s). HRMS (TOF/EI+): Calculated for  $C_7H_7F_5S^+$ : 218.0189, found: 218.0201.

**[4-(*tert*-butyl)phenyl]pentafluoro- $\lambda^6$ -sulfane**

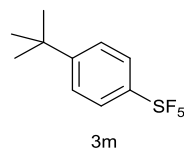

Prepared following Method C, reaction time for 24 h. Flash column chromatography: Pentane. Yield 77 mg, 41%. Colorless liquid.  $^1H$  NMR (300 MHz,  $CDCl_3$ )  $\delta$  7.66 (d,  $J$  = 8.5 Hz, 2H), 7.45 (d,  $J$  = 7.7 Hz, 2H), 1.32 (s, 9H).  $^{19}F$  NMR (282 MHz,  $CDCl_3$ )  $\delta$  86.72 – 83.82 (m, 1F), 63.12 (d,  $J$  = 149.9 Hz, 4F).  $^{13}C$  NMR (126 MHz,  $CDCl_3$ )  $\delta$  155.21 (s), 151.56 (p,  $J$  = 16.9 Hz), 125.94 – 125.67 (m), 35.07 (s), 31.20 (s). IR (KBr,  $cm^{-1}$ ): 2967, 2909, 2872, 1596, 1499, 1477, 1463, 1402, 1366, 1268, 1091, 840. HRMS (TOF/EI+): Calculated for  $C_{10}H_{13}F_5S^+$ : 260.0658, found: 260.0673.

**(4-chlorophenyl)pentafluoro- $\lambda^6$ -sulfane**

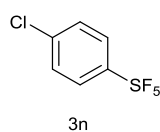

Prepared following Method C, reaction time for 12 h. Flash column chromatography: Pentane. Yield 0.140 g, 82%. Colorless liquid.  $^1H$  NMR (300 MHz,  $CDCl_3$ )  $\delta$  7.70 (d,  $J$  = 9.0 Hz, 2H), 7.44 (d,  $J$  = 8.7 Hz, 2H).  $^{19}F$  NMR (282 MHz,  $cdcl_3$ )  $\delta$  84.85 – 82.43 (m), 63.15 (d,  $J$  = 150.3 Hz).  $^{13}C$  NMR (126 MHz,  $CDCl_3$ )  $\delta$  152.84 – 151.58 (m), 137.94 (s), 129.05 (s), 127.57 (p,  $J$  = 4.6 Hz). IR (KBr,  $cm^{-1}$ ) 3016, 1583, 1490, 1475, 1402, 1093, 831. HRMS (TOF/EI+): Calculated for  $C_6H_4ClF_5S^+$ : 237.9642, found: 237.9653.

**(4-bromophenyl)pentafluoro- $\lambda^6$ -sulfane**

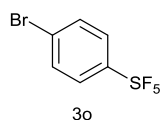

Prepared following Method C, reaction time for 12 h. Flash column chromatography: Pentane. Yield 0.157 g, 77%. Colorless liquid.  $^1H$  NMR (300 MHz,  $CDCl_3$ )  $\delta$  7.62 (s, 4H).  $^{19}F$  NMR (282 MHz,  $CDCl_3$ )  $\delta$  85.00 – 82.18 (m, 1F), 63.02 (d,  $J$  = 150.4 Hz, 4F).

**(3-bromophenyl)pentafluoro- $\lambda^6$ -sulfane**

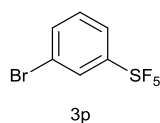

Prepared following Method C, under 65°C, reaction time for 12 h. Flash column chromatography: Pentane. Yield 145.0 mg, 71%. Colorless liquid.  $^1H$  NMR (300 MHz,  $CDCl_3$ )  $\delta$  7.91 (t,  $J$  = 1.9 Hz, 1H), 7.74 – 7.63 (m, 2H), 7.36 (t,  $J$  = 8.2 Hz, 1H).  $^{19}F$  NMR (282 MHz,  $CDCl_3$ )  $\delta$  83.58 – 81.18 (m), 62.34 (d,  $J$  = 150.5 Hz).  $^{13}C$  NMR (126 MHz,  $CDCl_3$ )  $\delta$  155.14 – 154.20 (m), 134.91 (s), 130.26 (s), 129.31 (p,  $J$  = 4.8 Hz), 124.79 (p,  $J$  = 4.7 Hz), 122.38 (s). IR (KBr,  $cm^{-1}$ ): 3109, 3078, 1579, 1465, 1422, 1113, 1098, 1080, 852. HRMS (TOF/EI+): Calculated for  $C_6H_4BrF_5S^+$ : 281.9137, found: 281.9143.

## 17. References

- [1]. T. Umemoto, L. Garrick, N. Saito, *Beilstein J. Org. Chem.* 2012, **8**, 461.
- [2]. O. S. Kanishchev, W. R. Dolbier, Jr., *Angew. Chem. Int. Ed.* 2015, **54**, 280.
- [3]. M. Kosobokov, B. Cui, A. balia, K. Matsuzaki, E. Tokunaga, N. Saito, N. Shibata, *Angew.*

*Chem. Int. Ed.* 2016, **55**, 10781.

[4]. S. J. Nara, M. Jha, J. Brinkhorst, T. J. Zemanek, D. A. Pratt, *J. Org. Chem.* 2008, **73**, 9326.



# 18. $^1\text{H}$ , $^{19}\text{F}$ and $^{13}\text{C}$ NMR Spectra of Products.

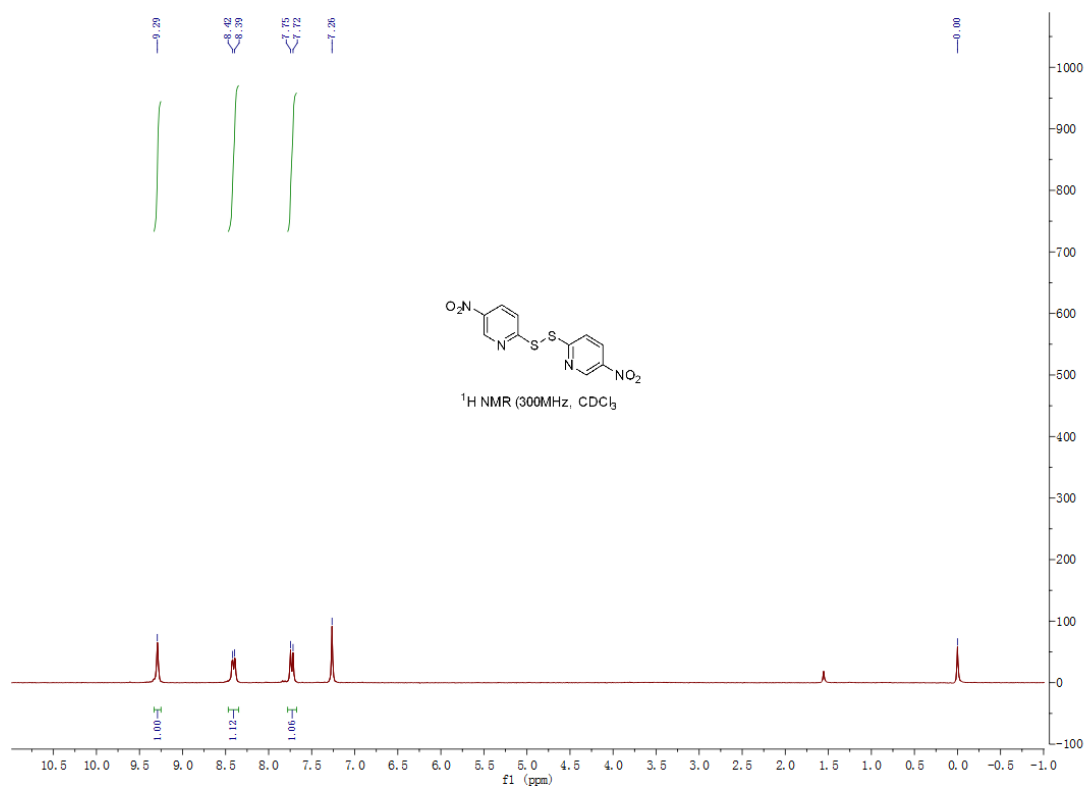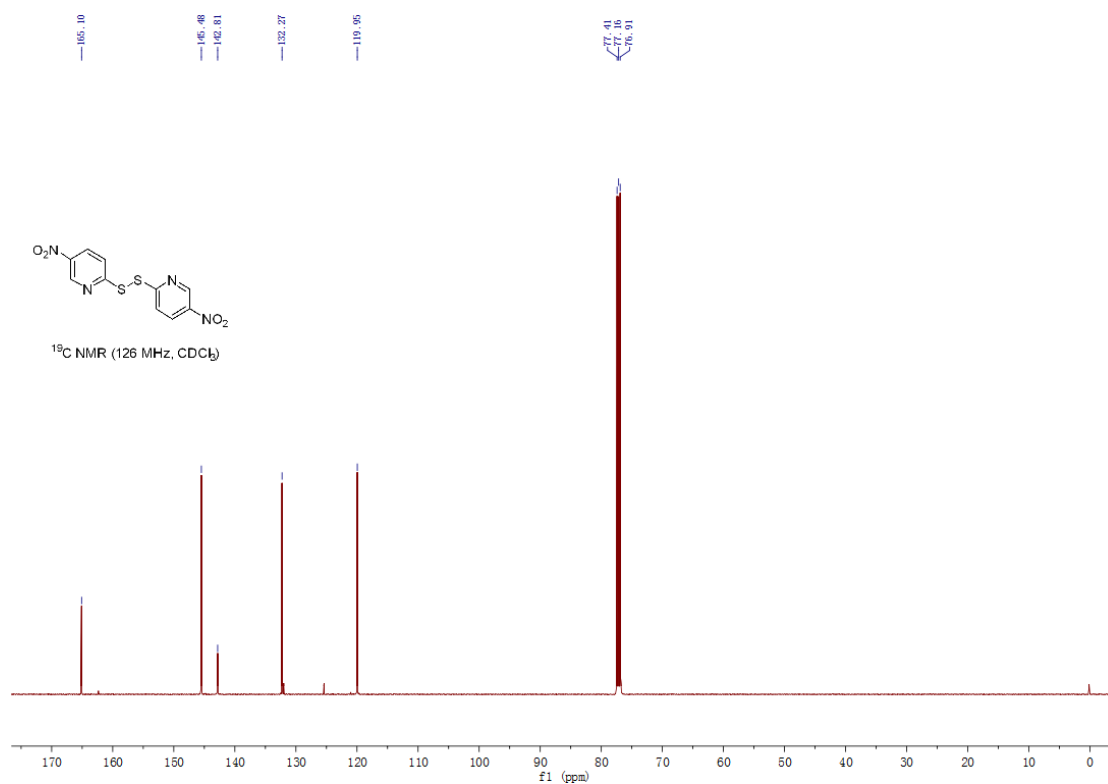

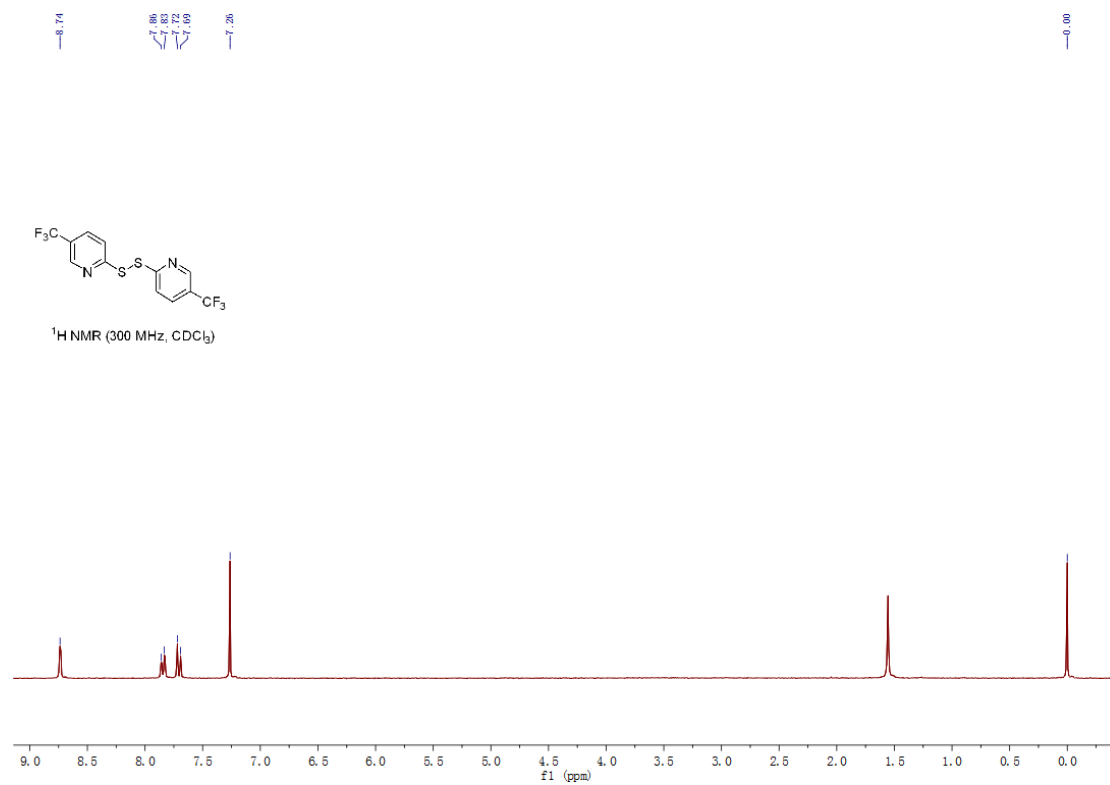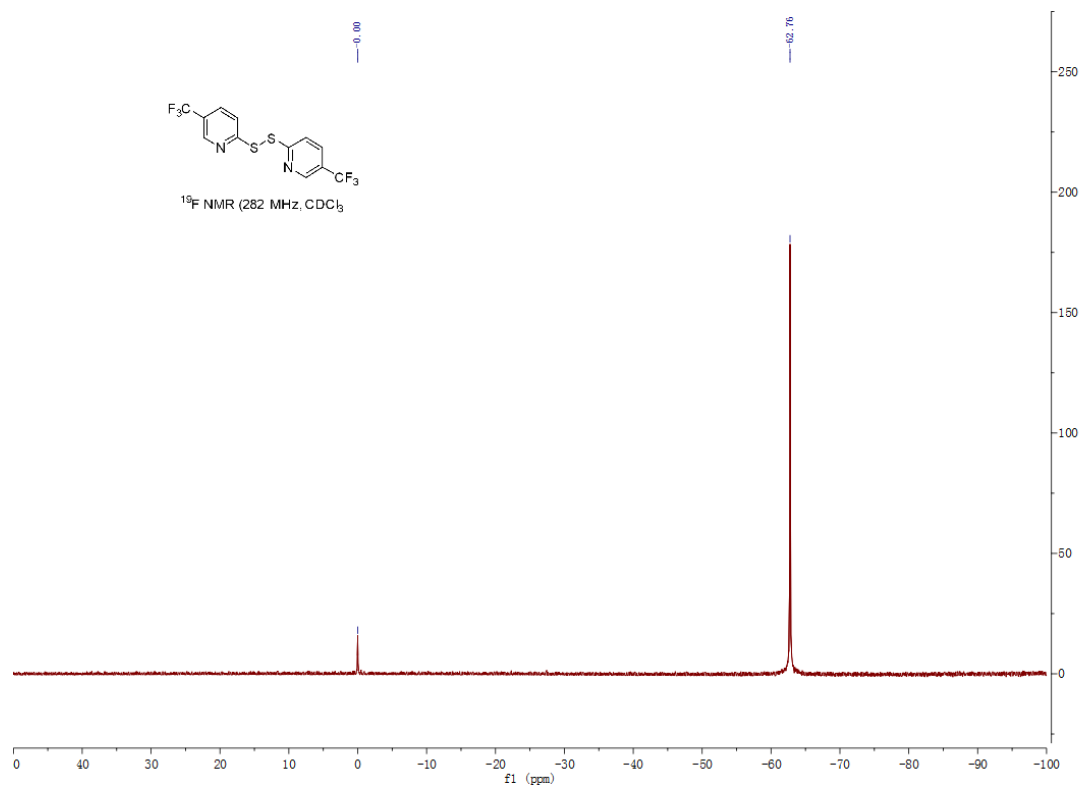

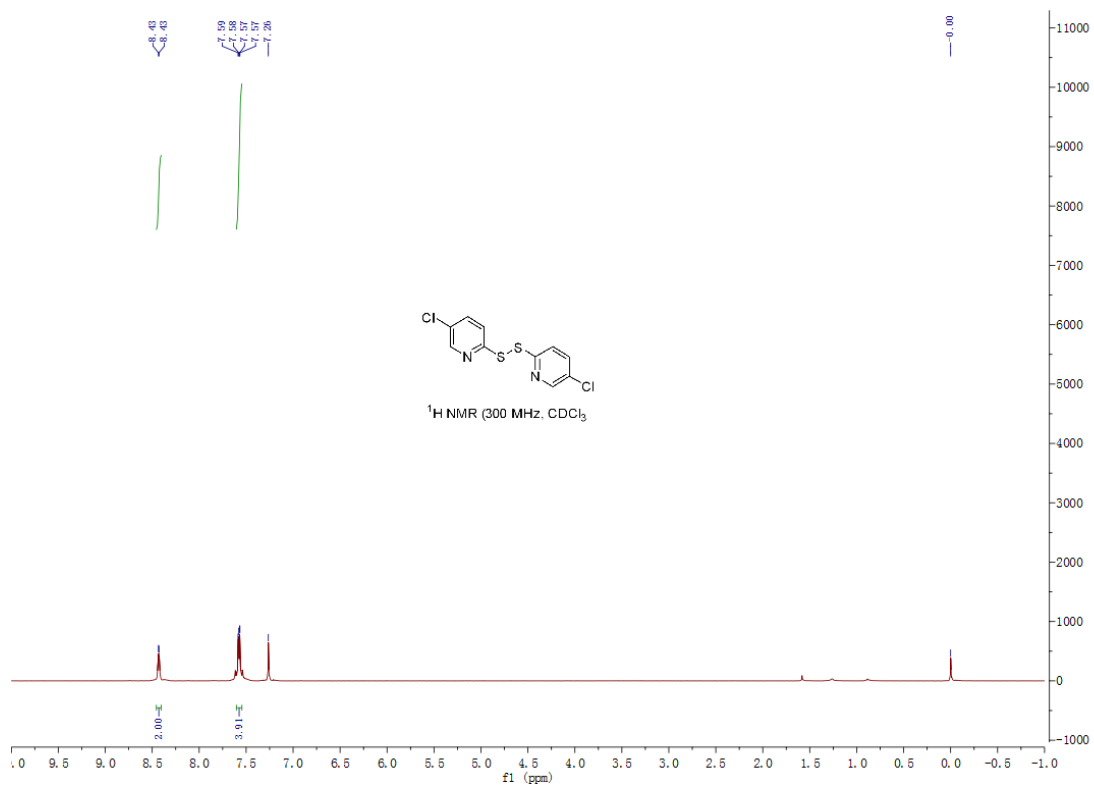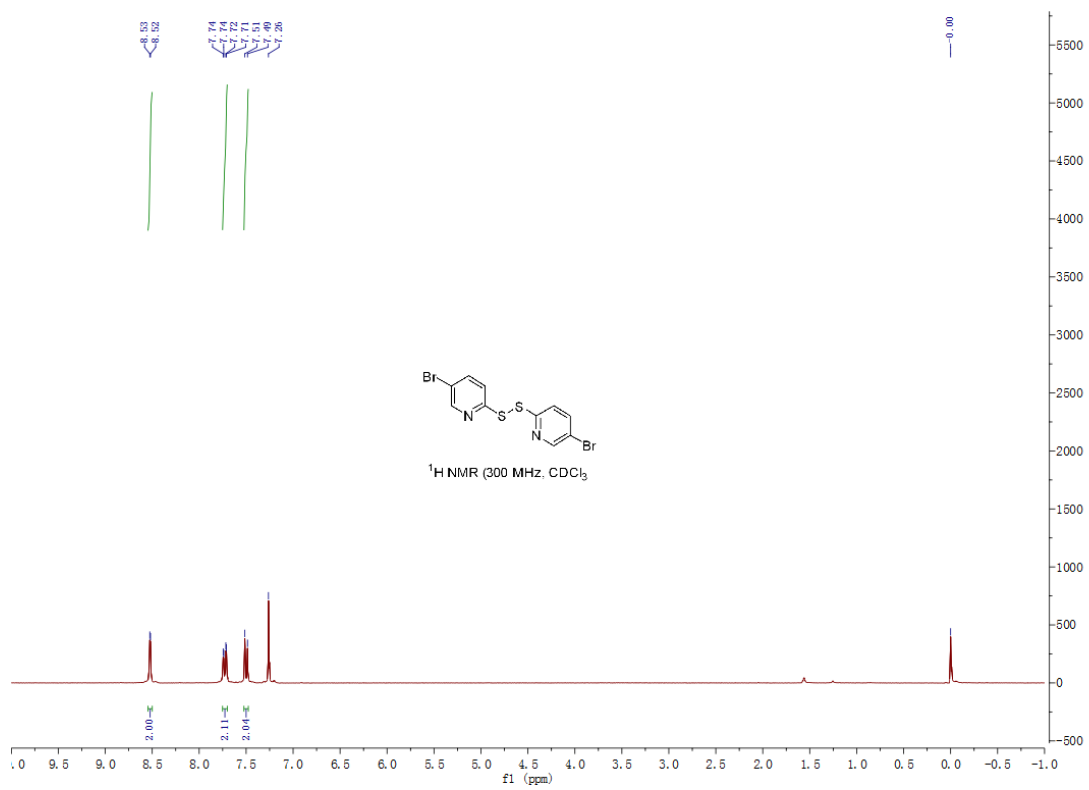



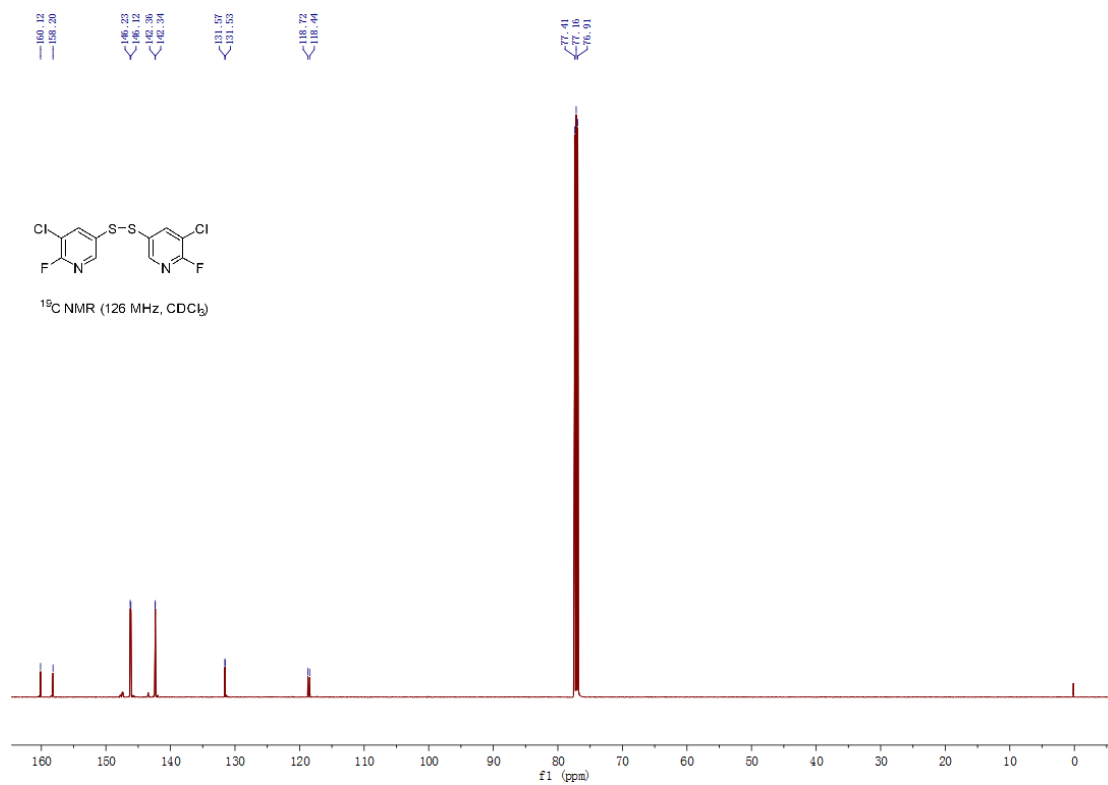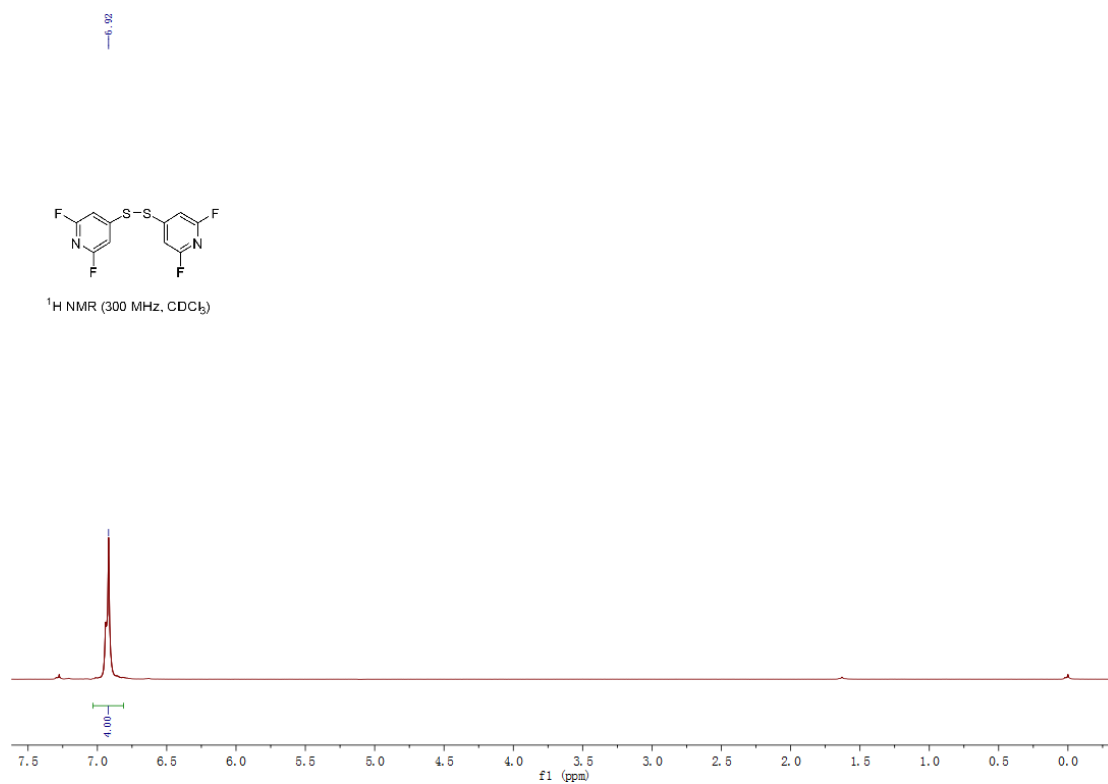

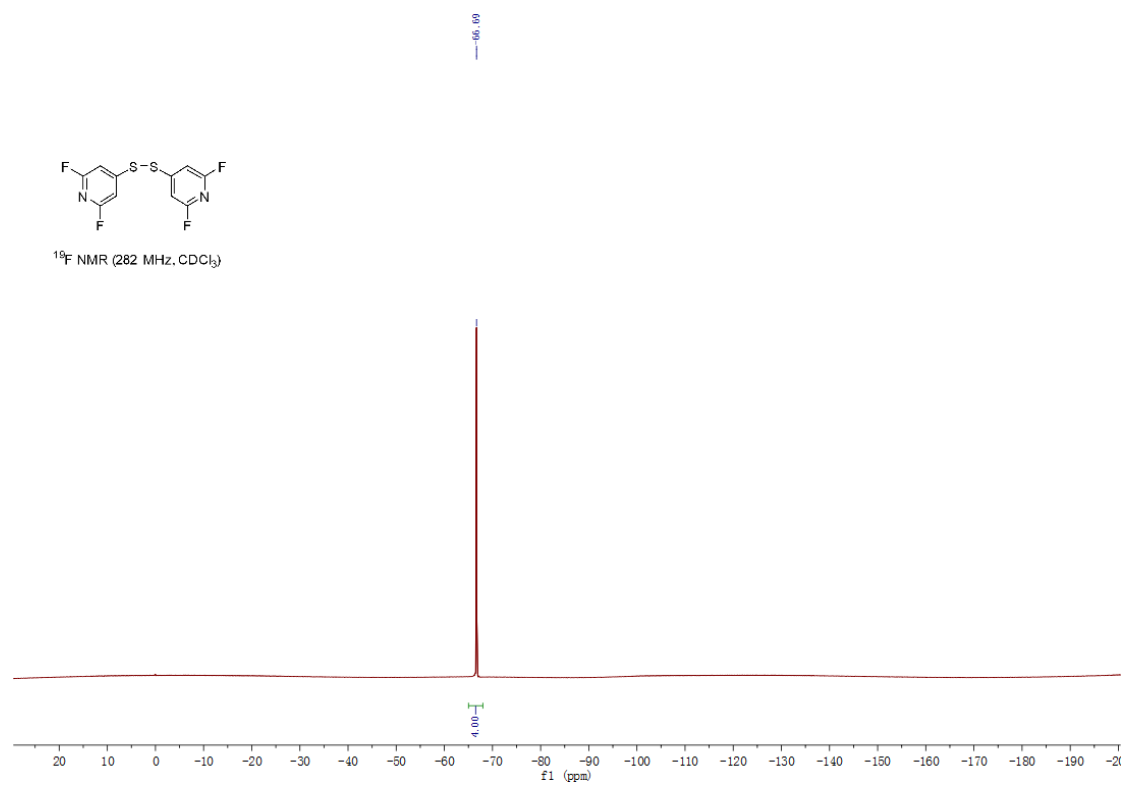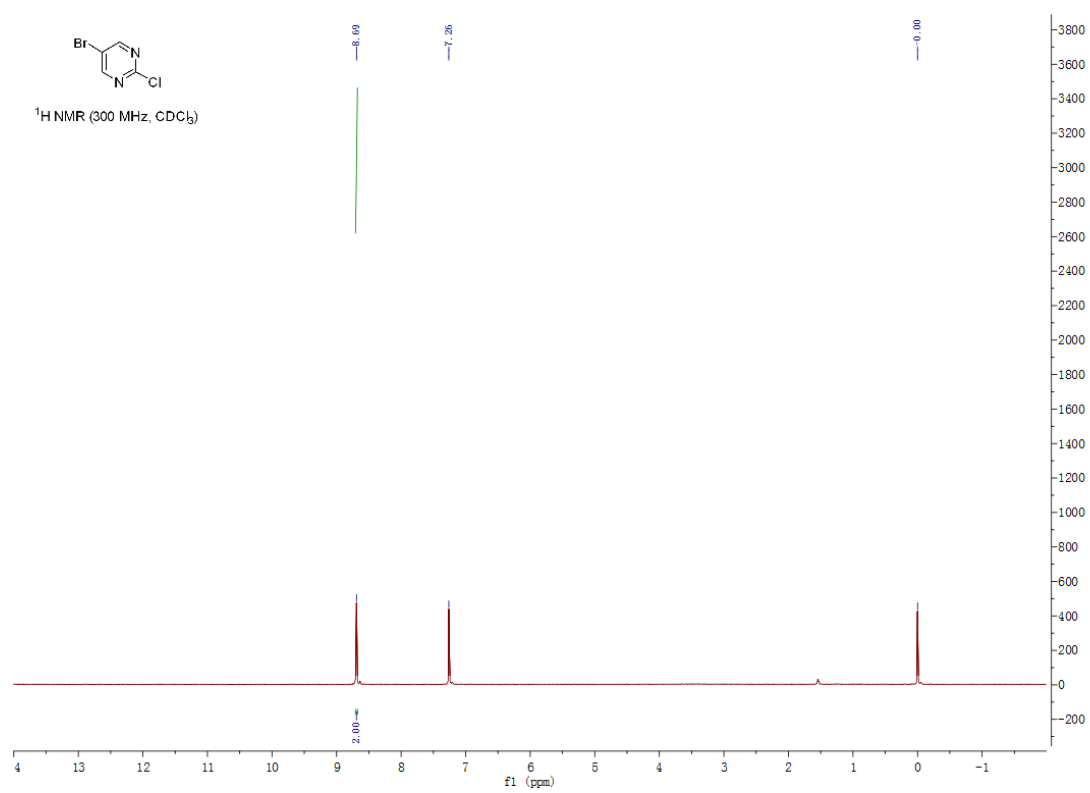

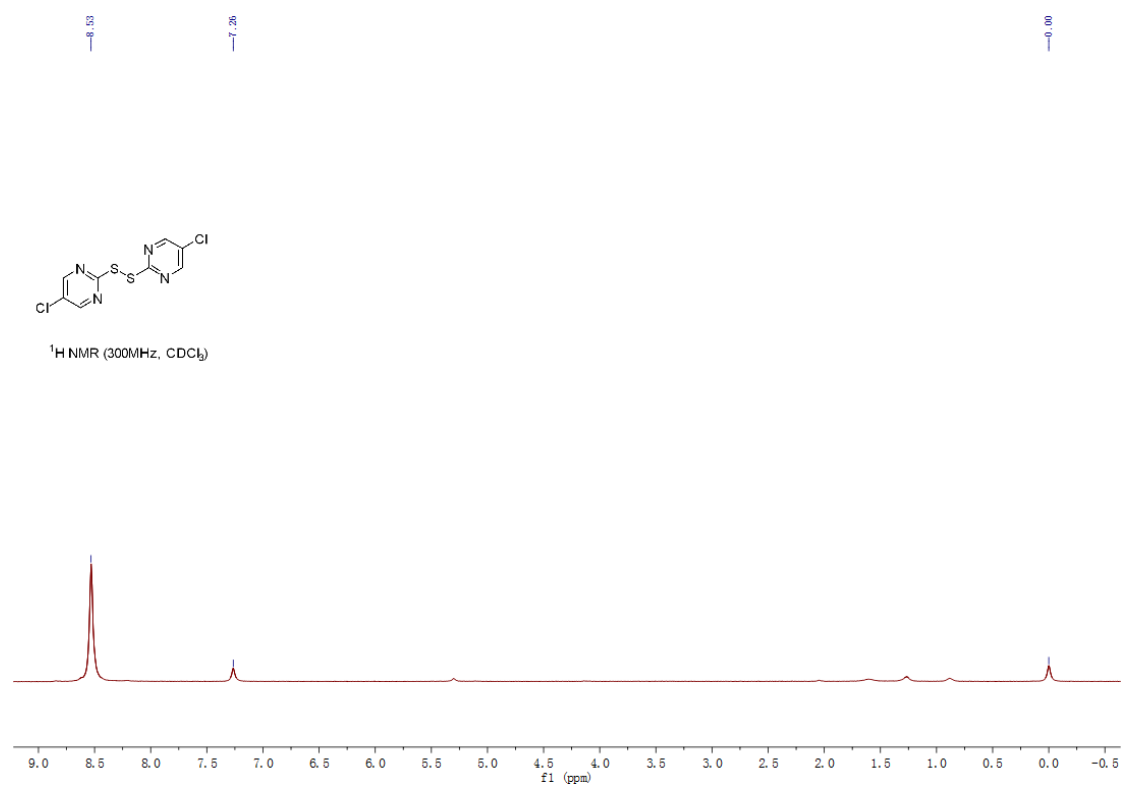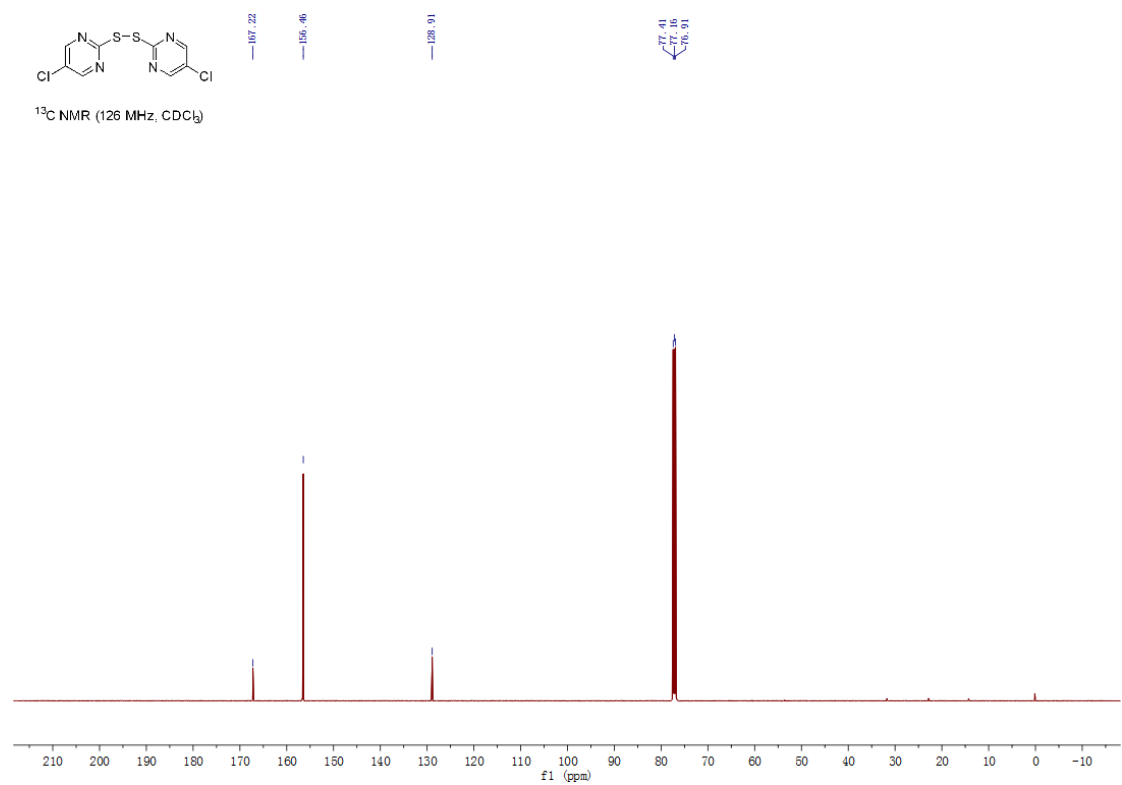

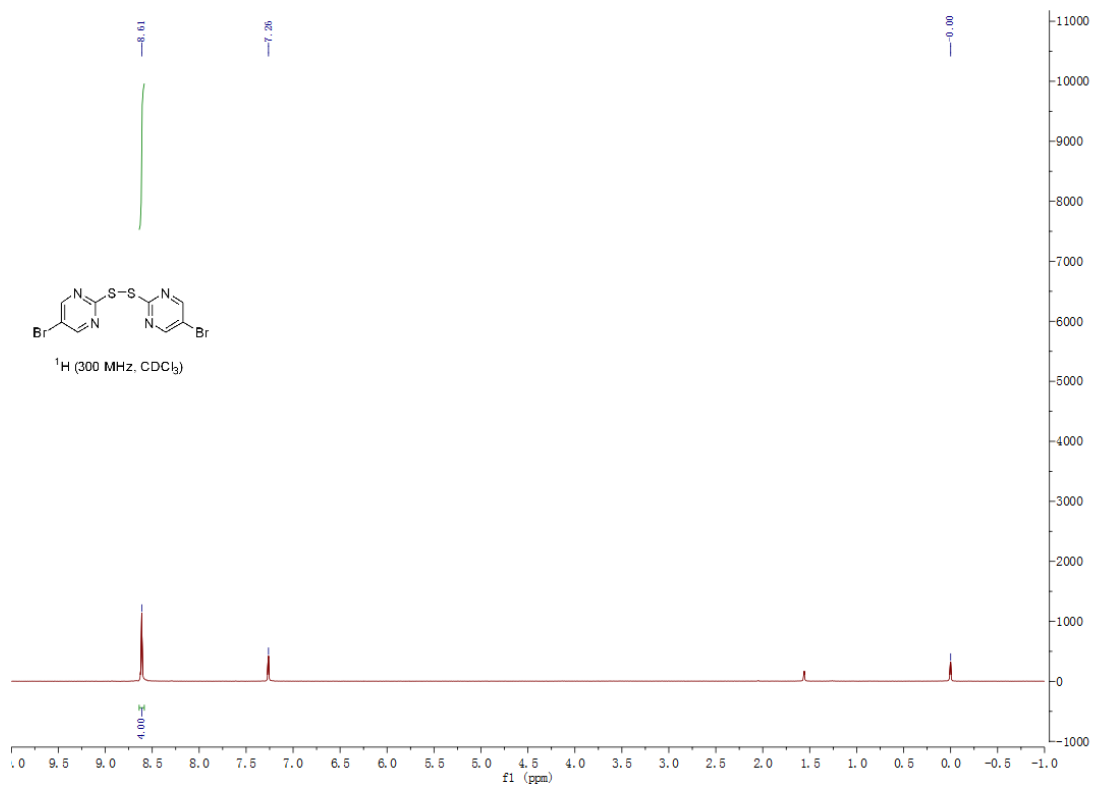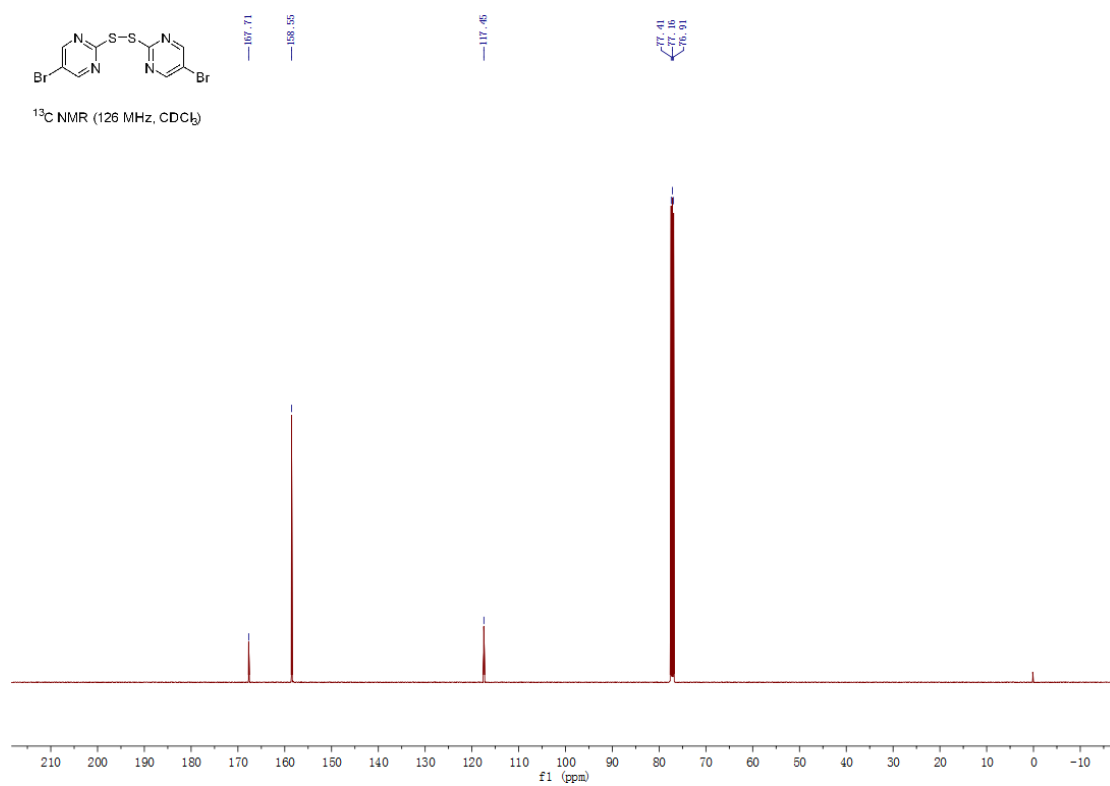



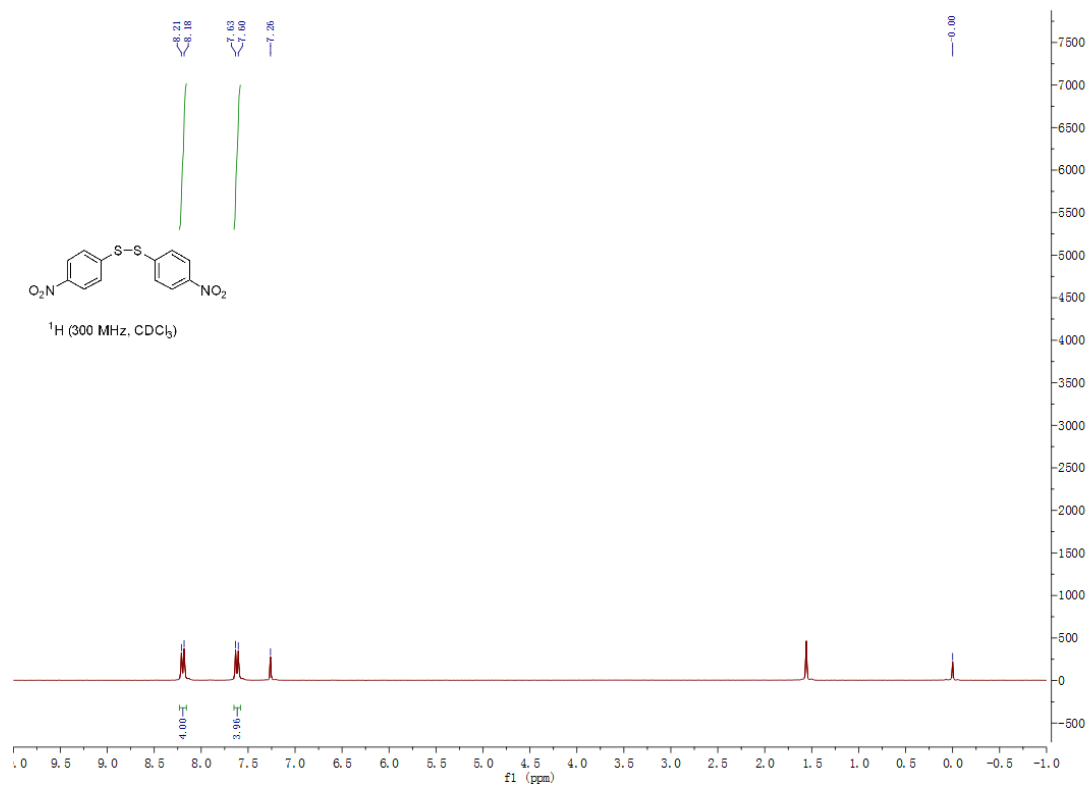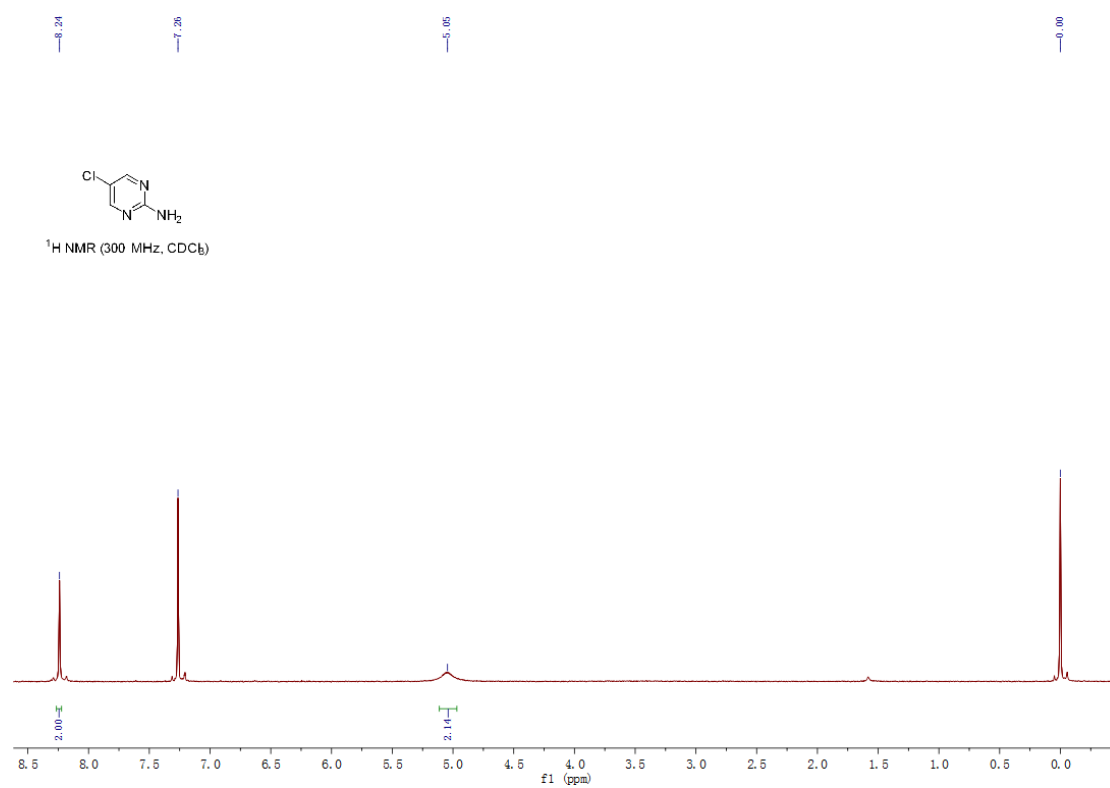

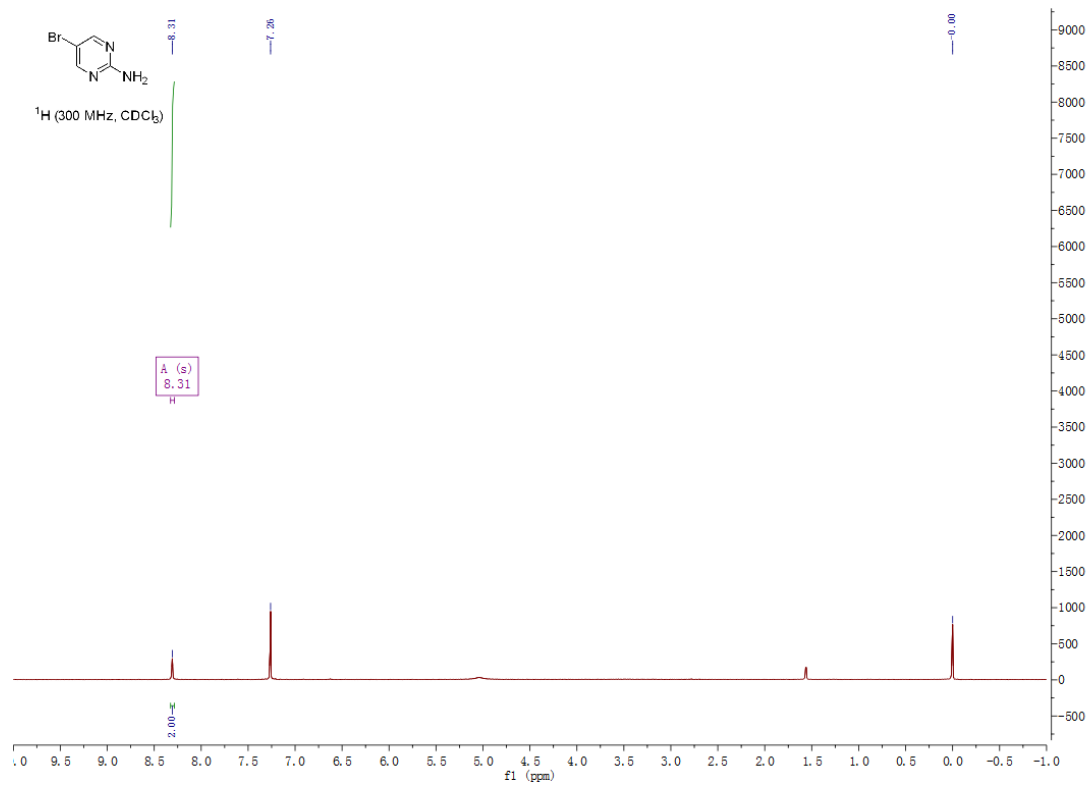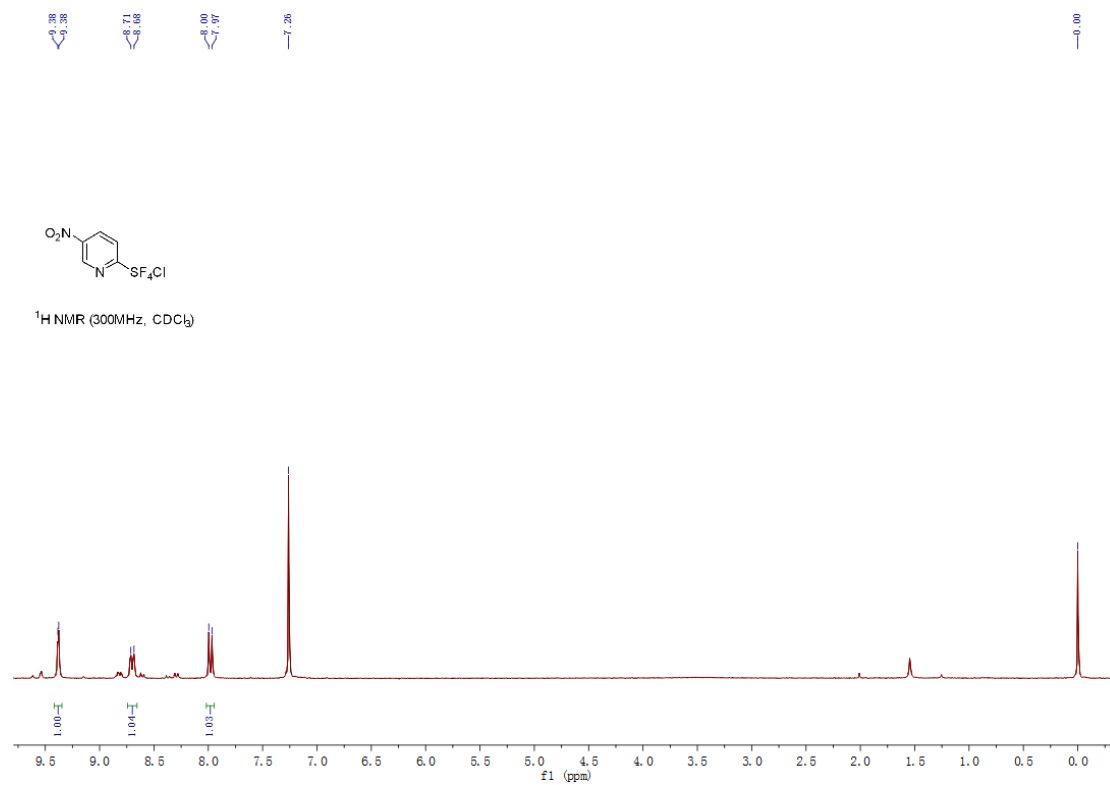

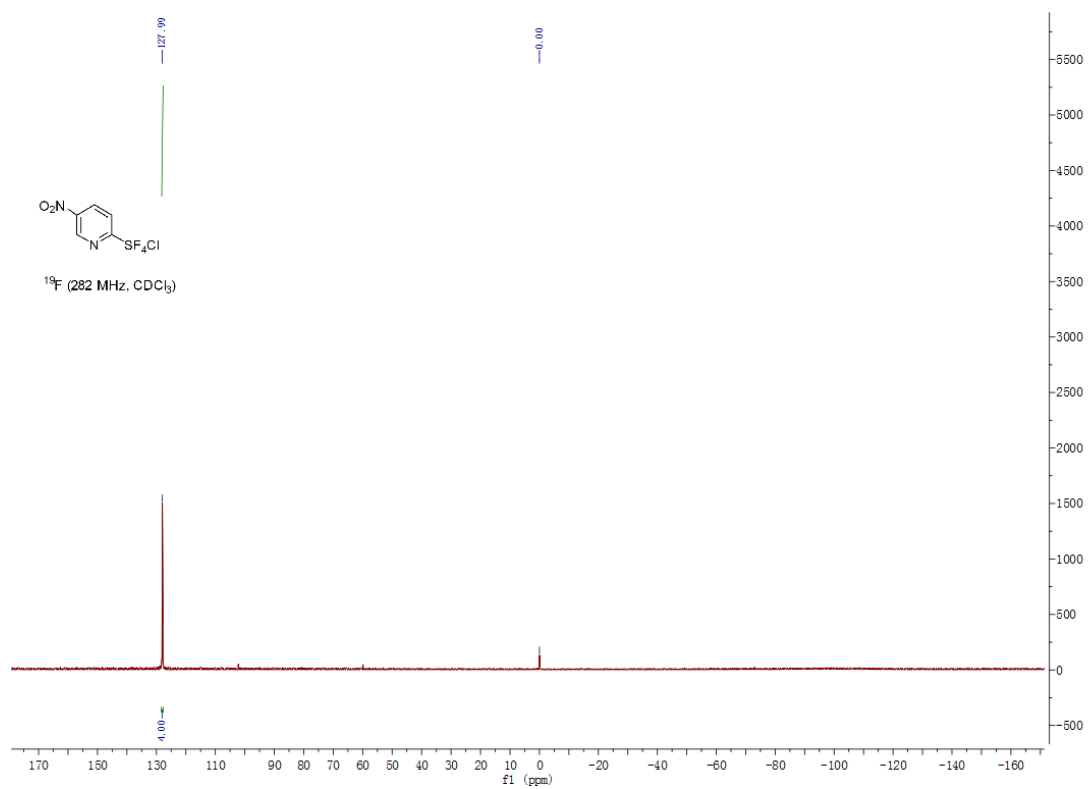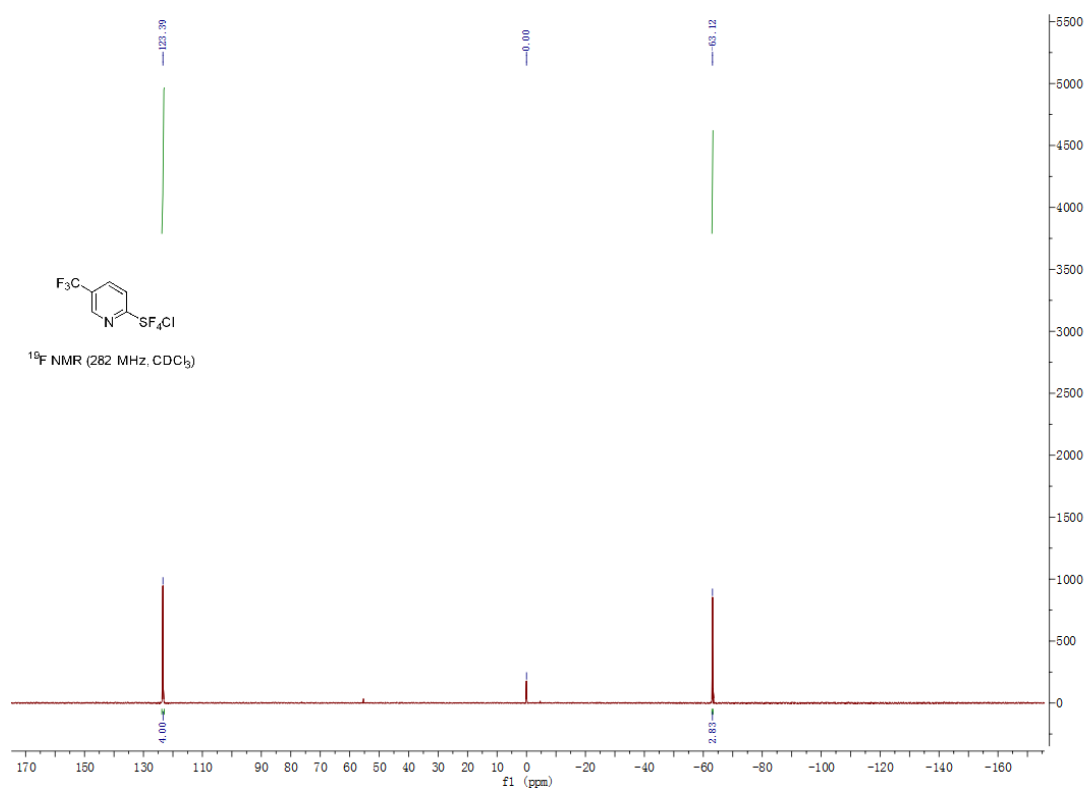

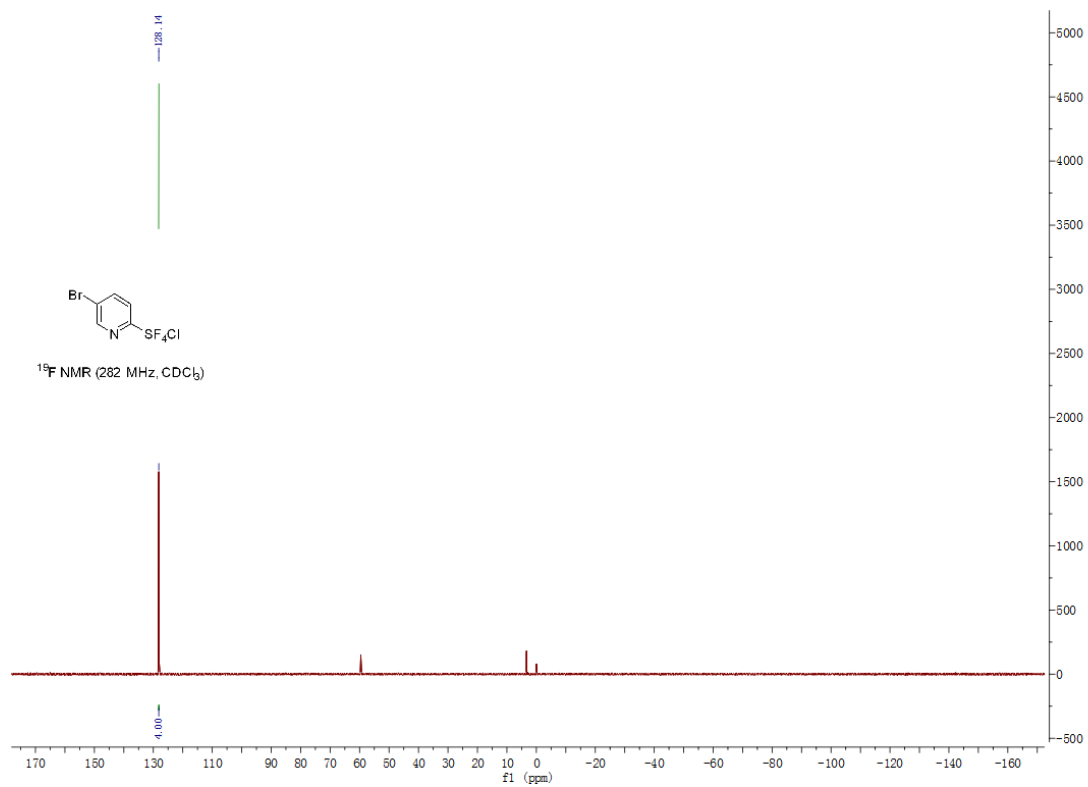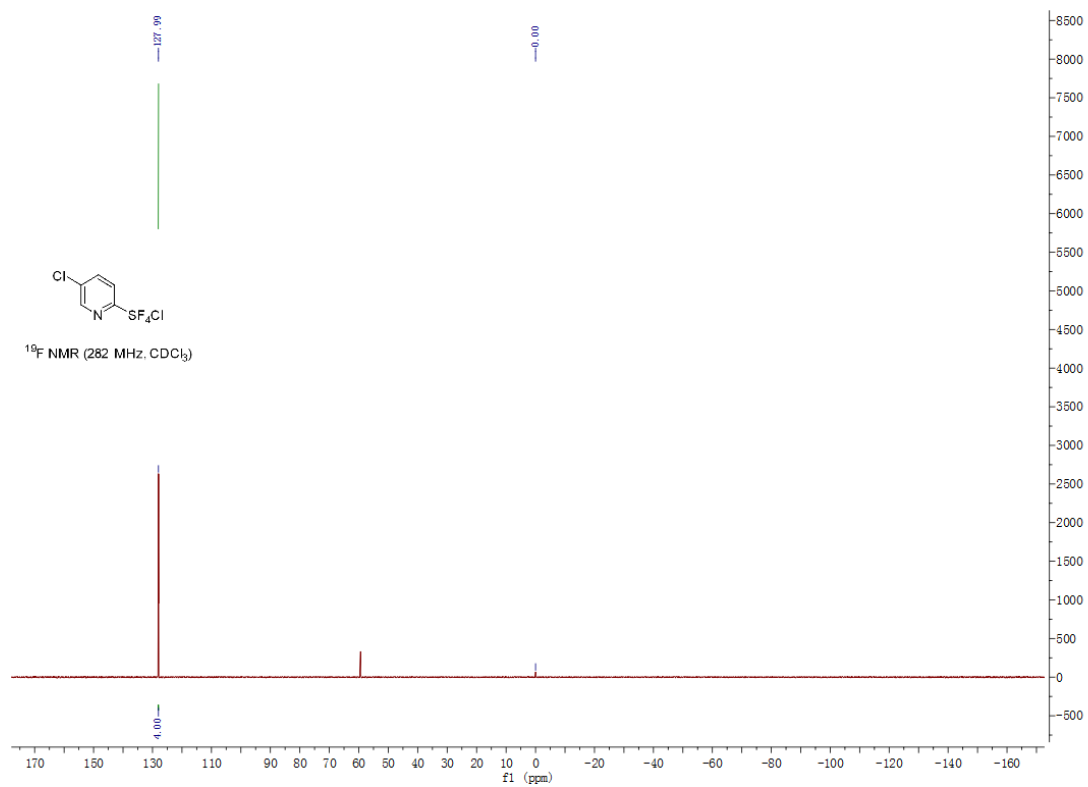

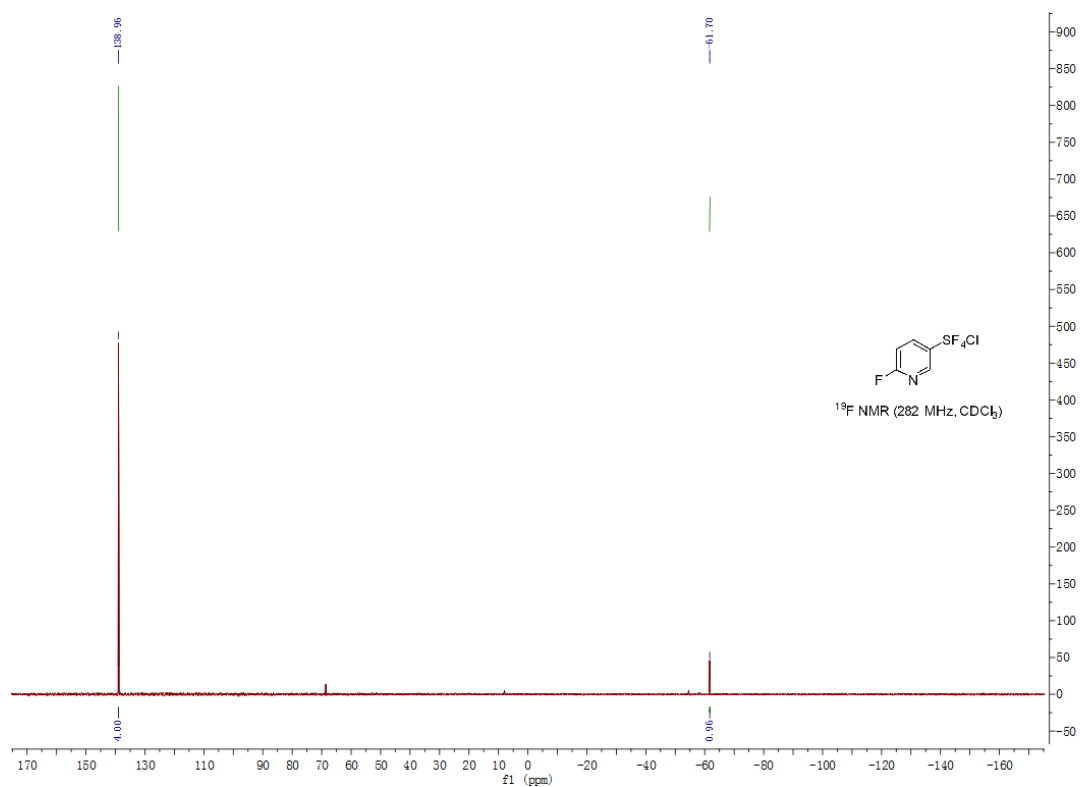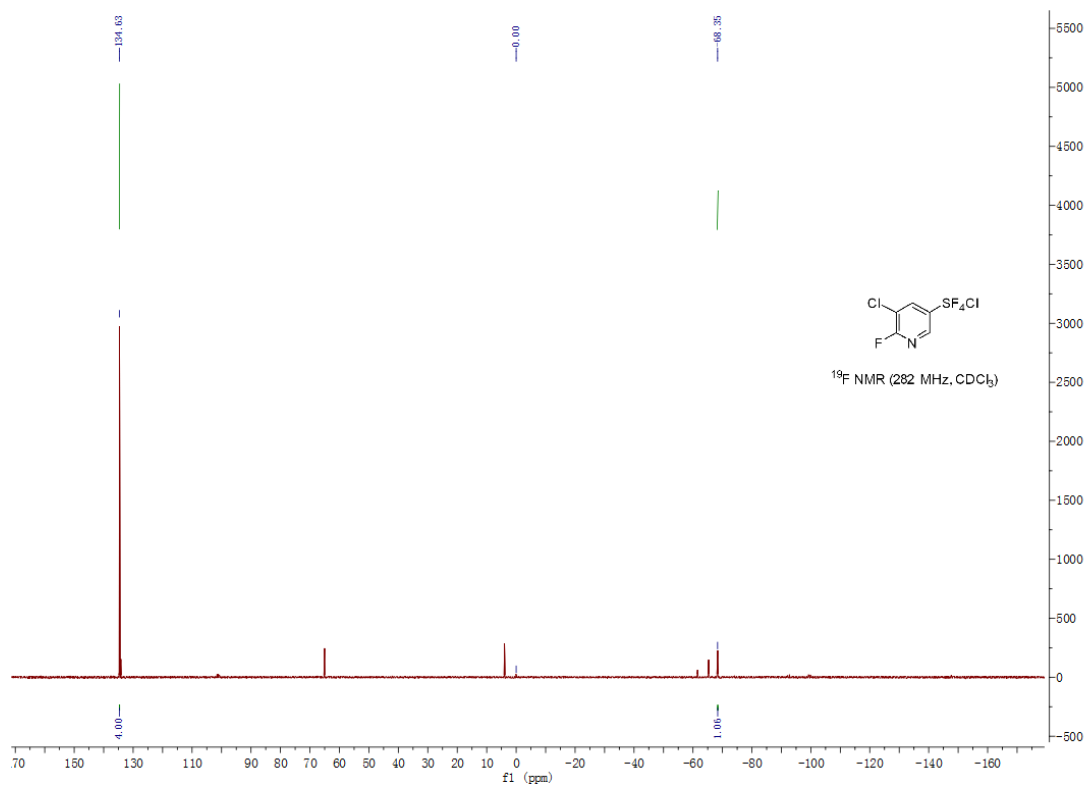

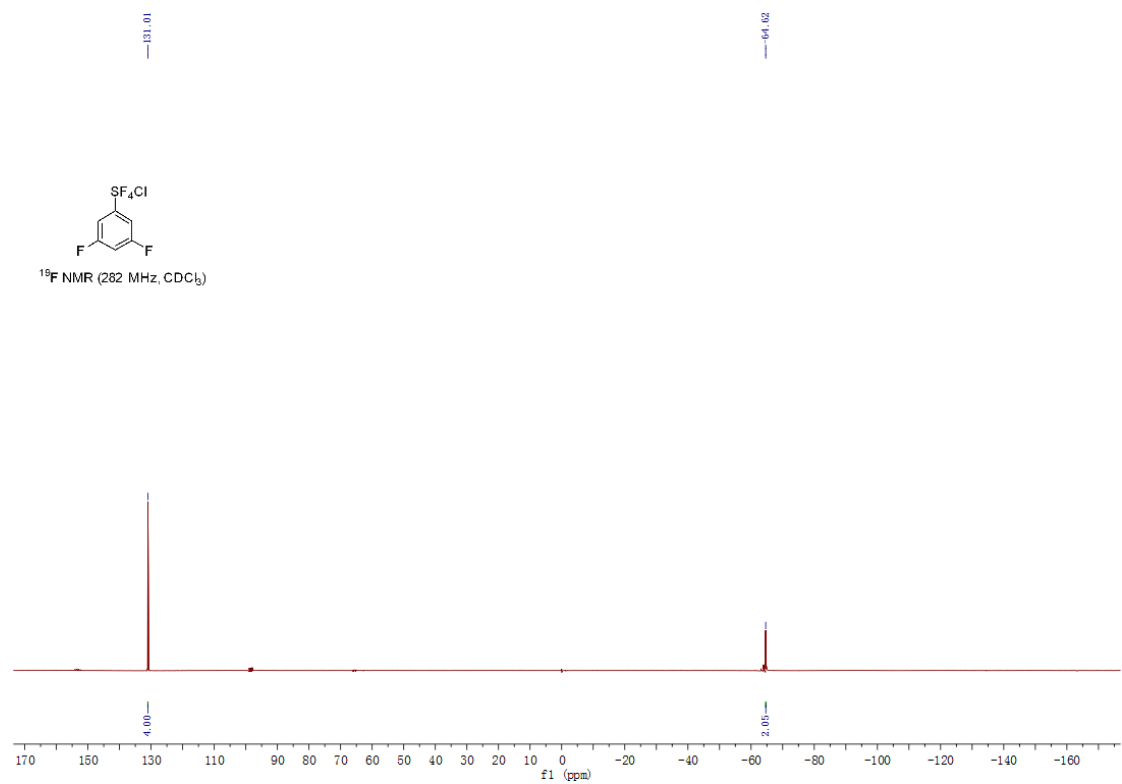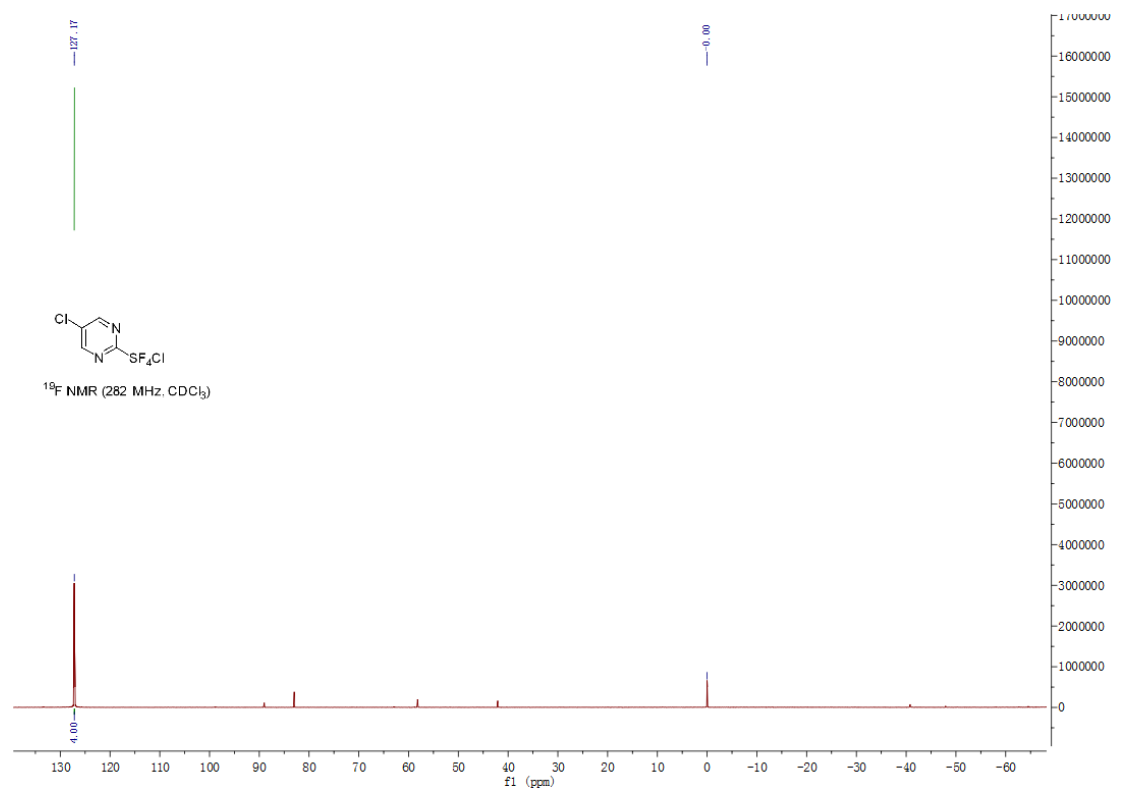

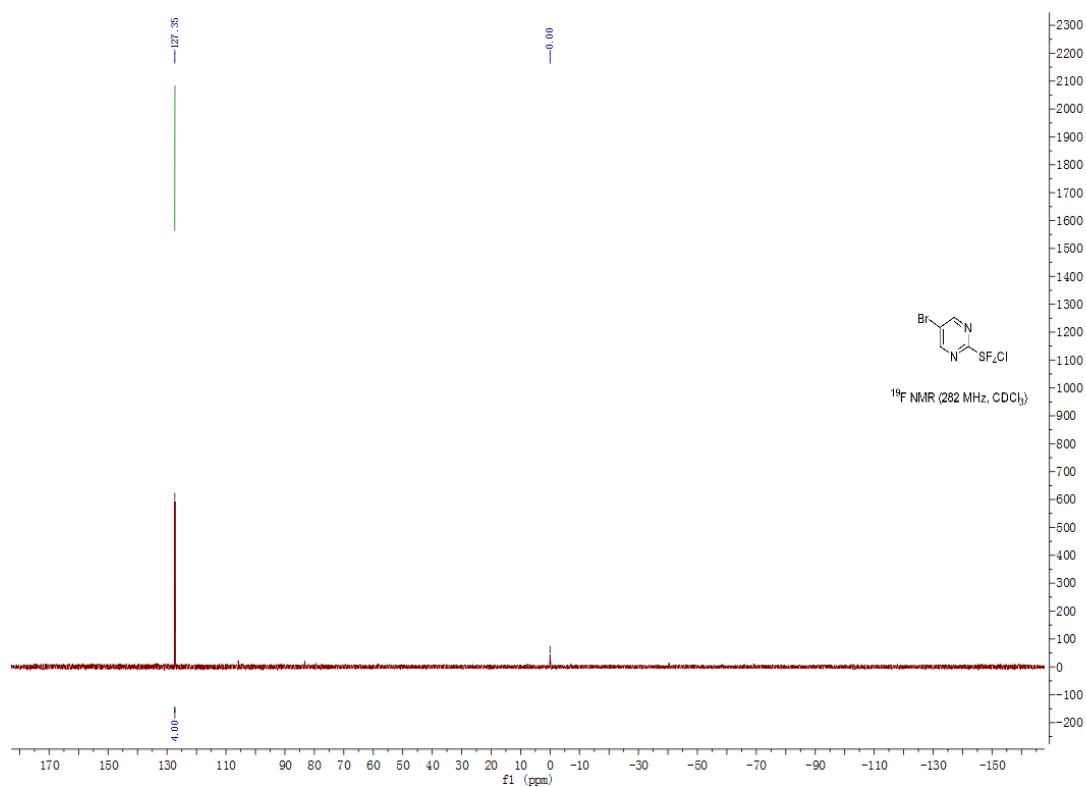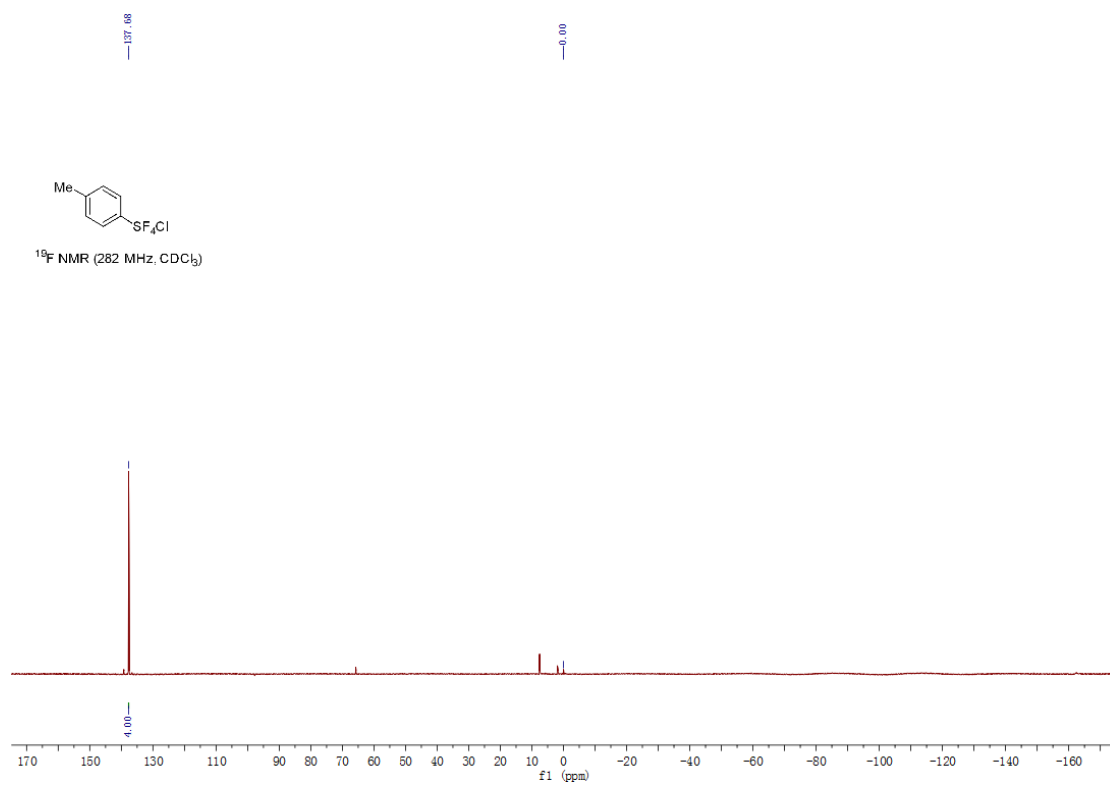

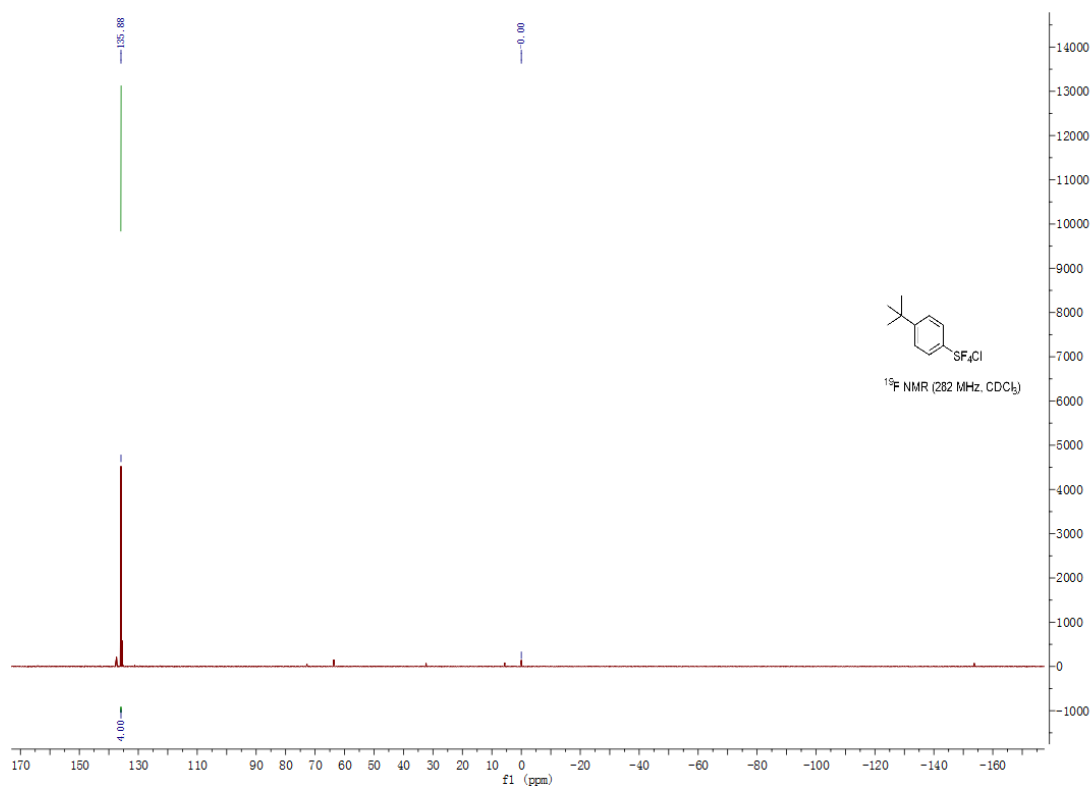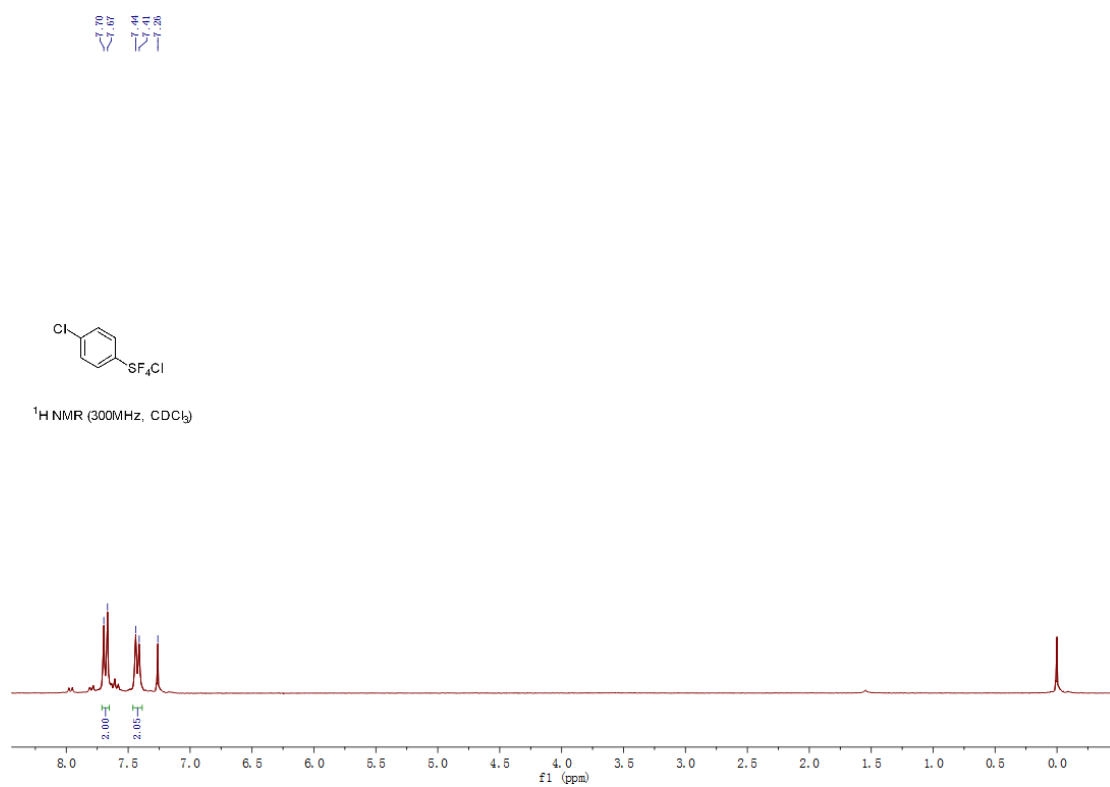



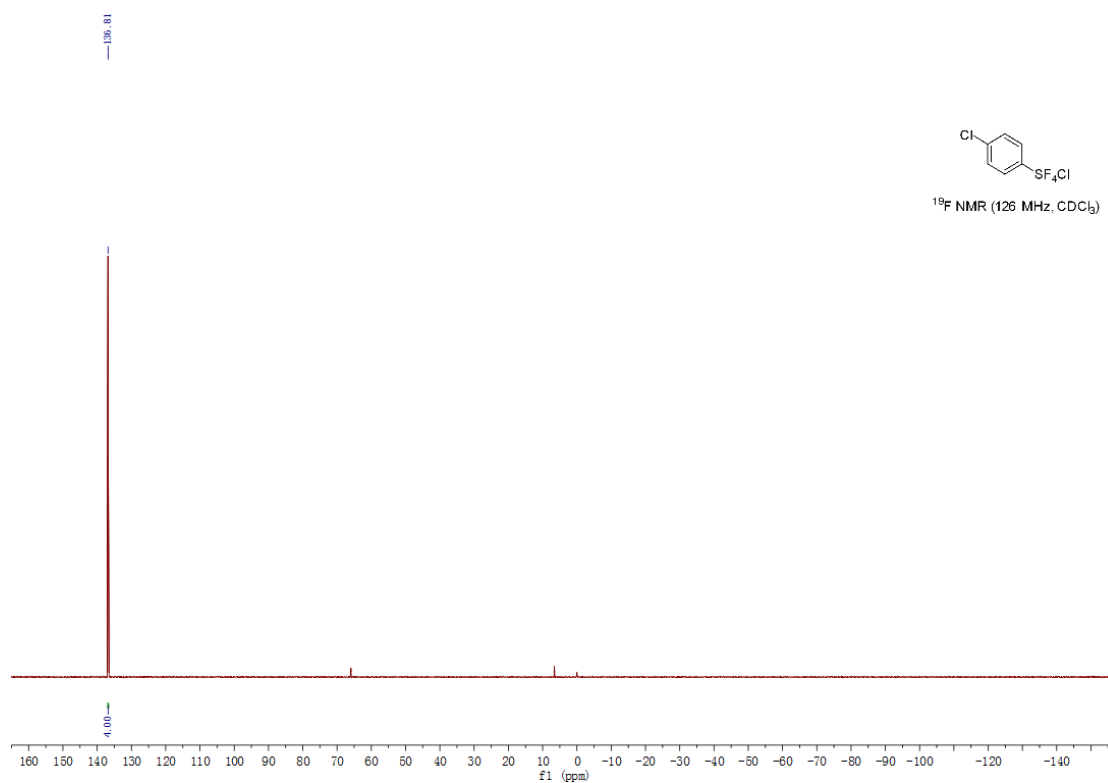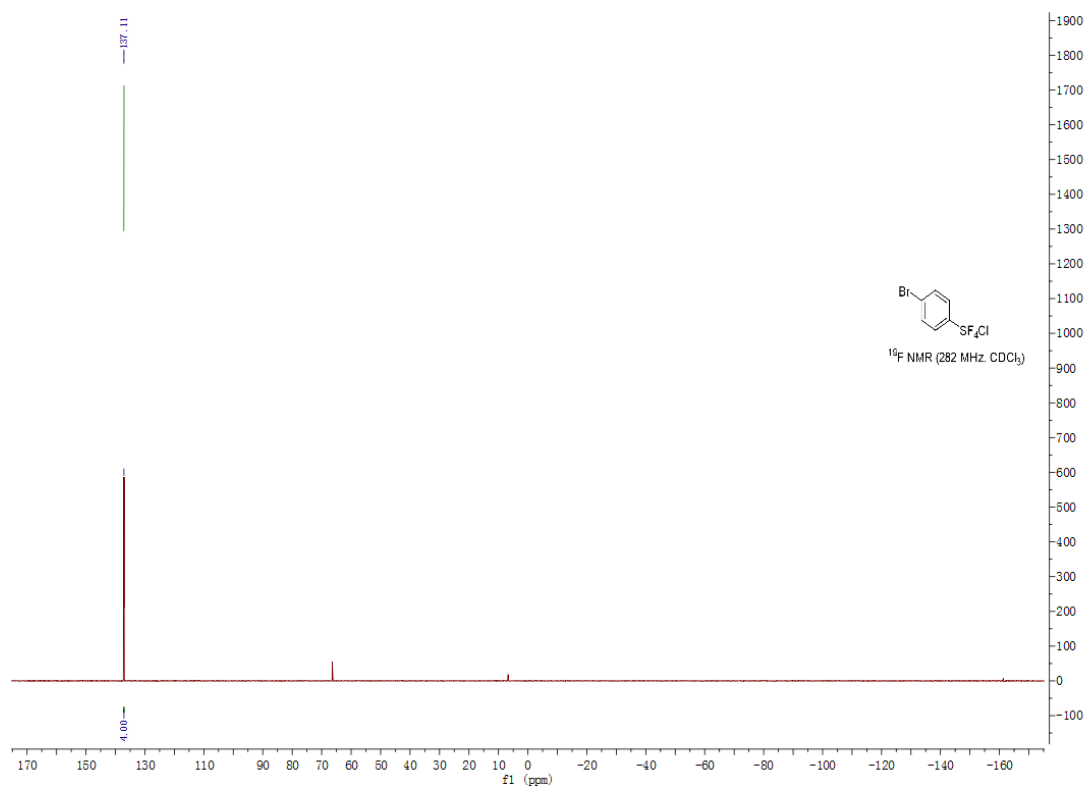

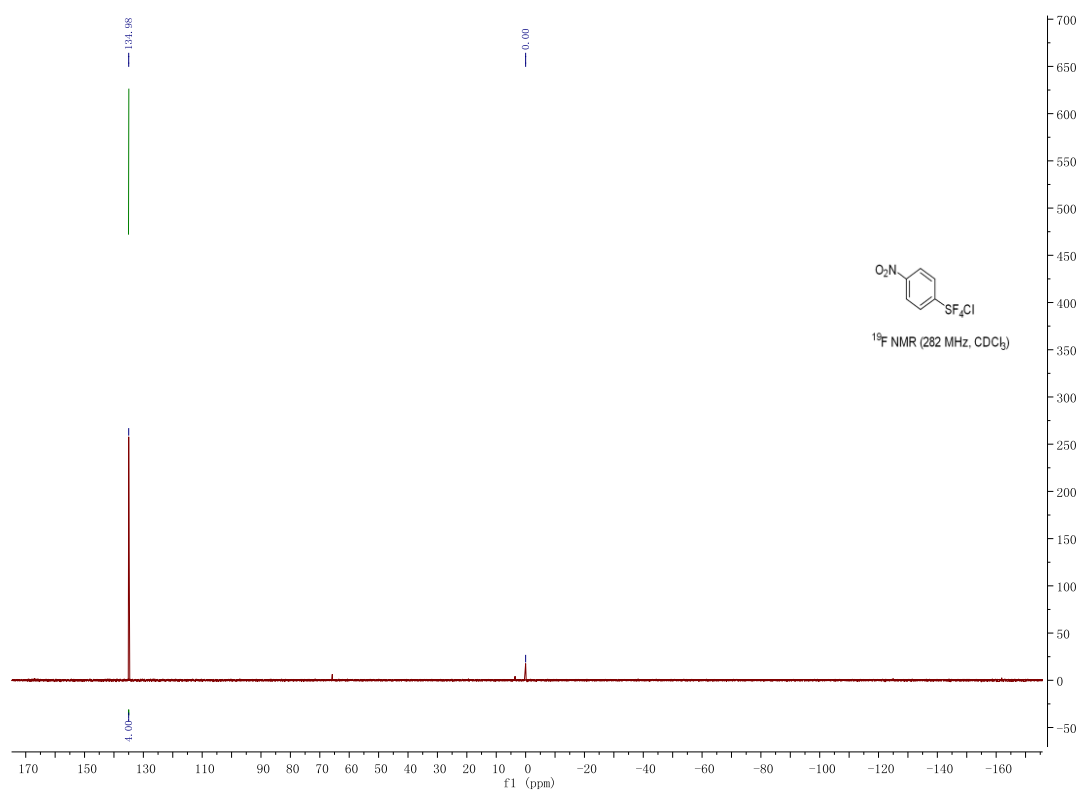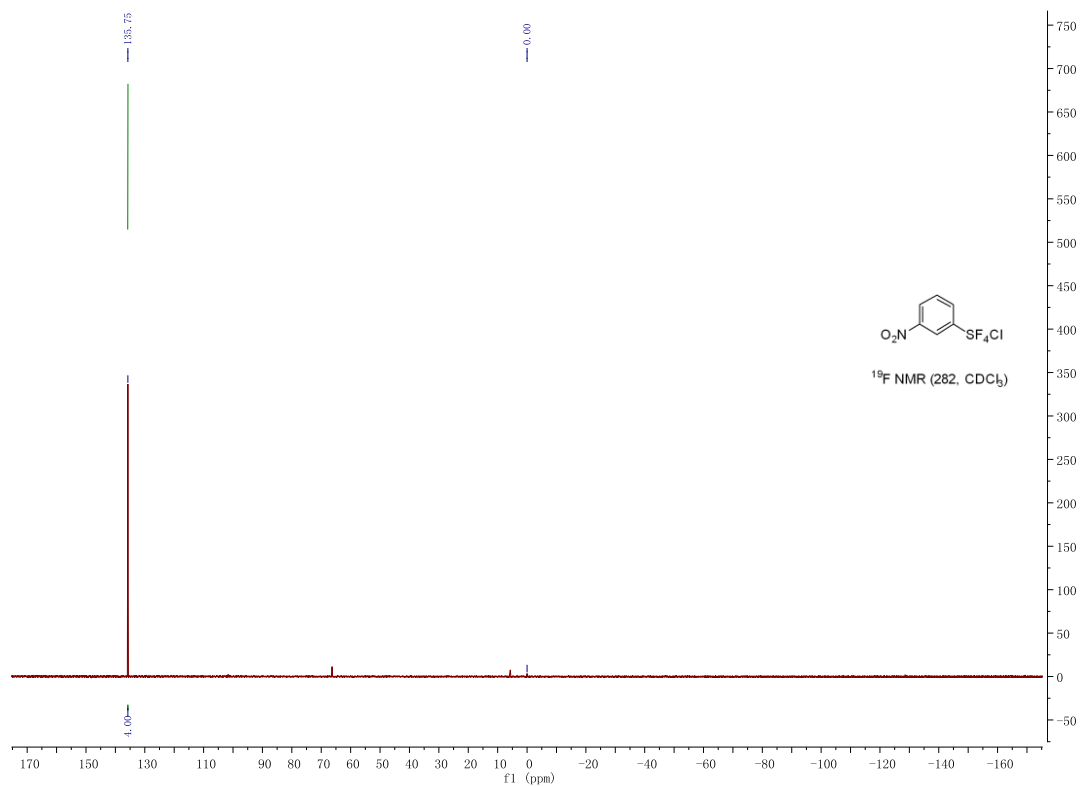

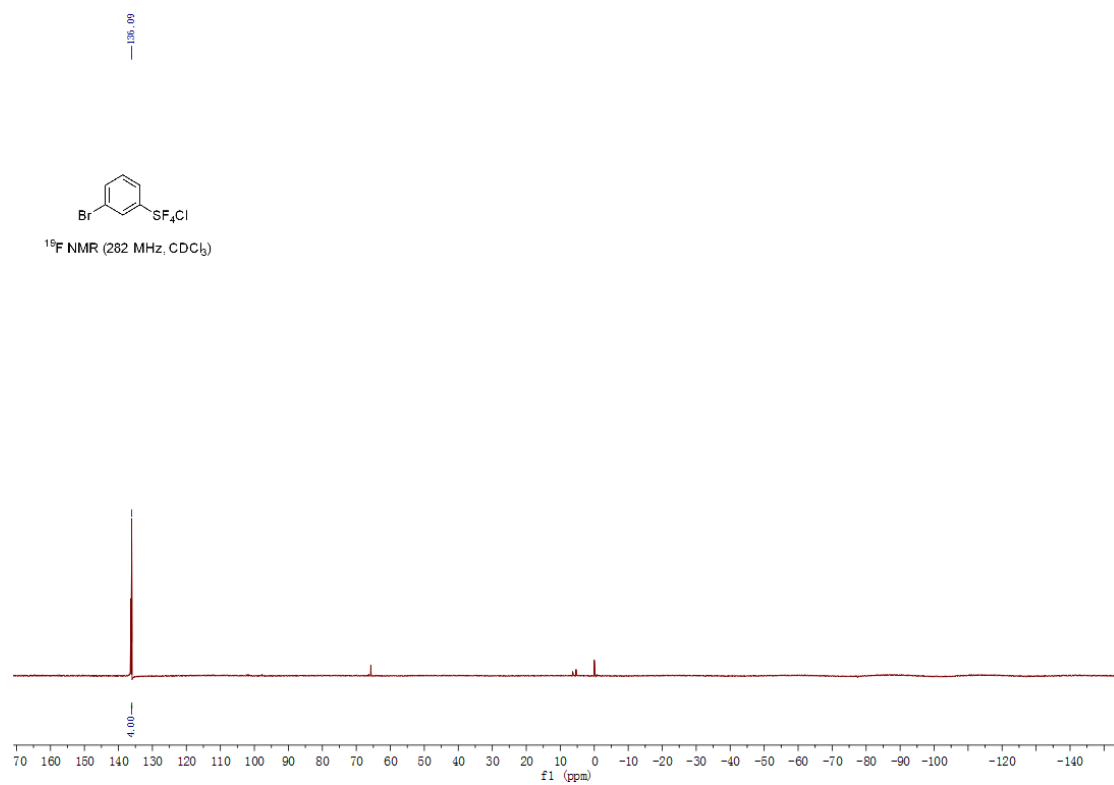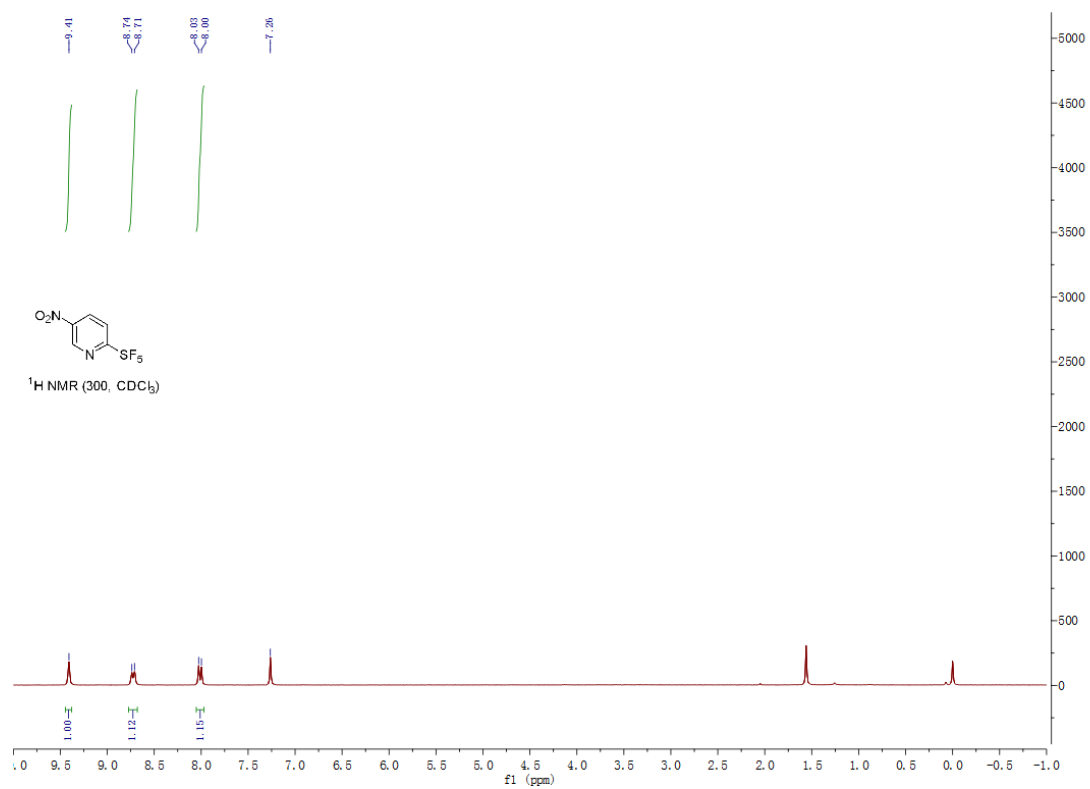

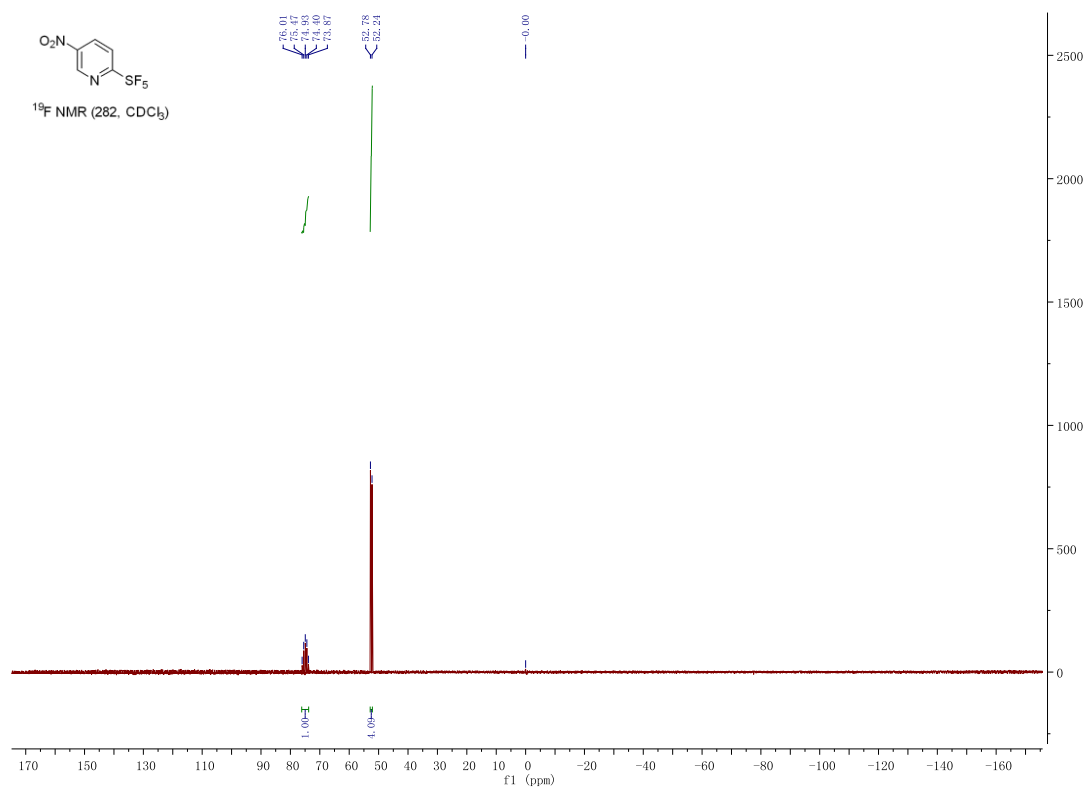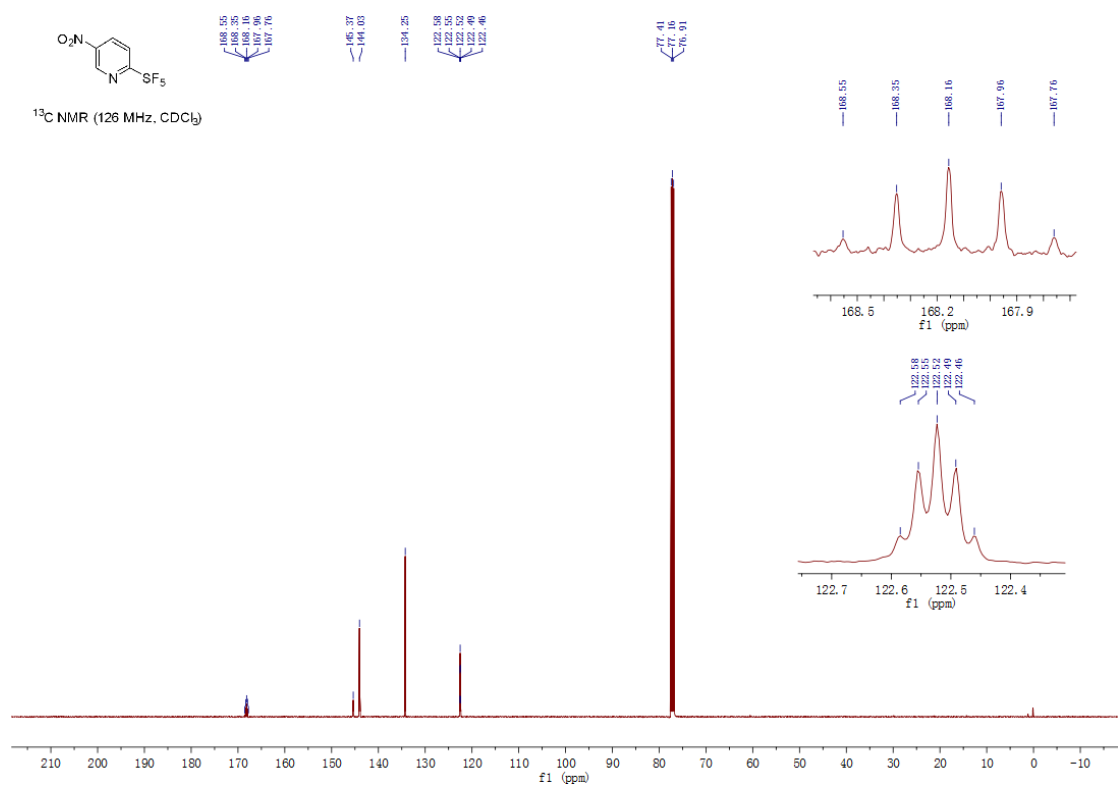

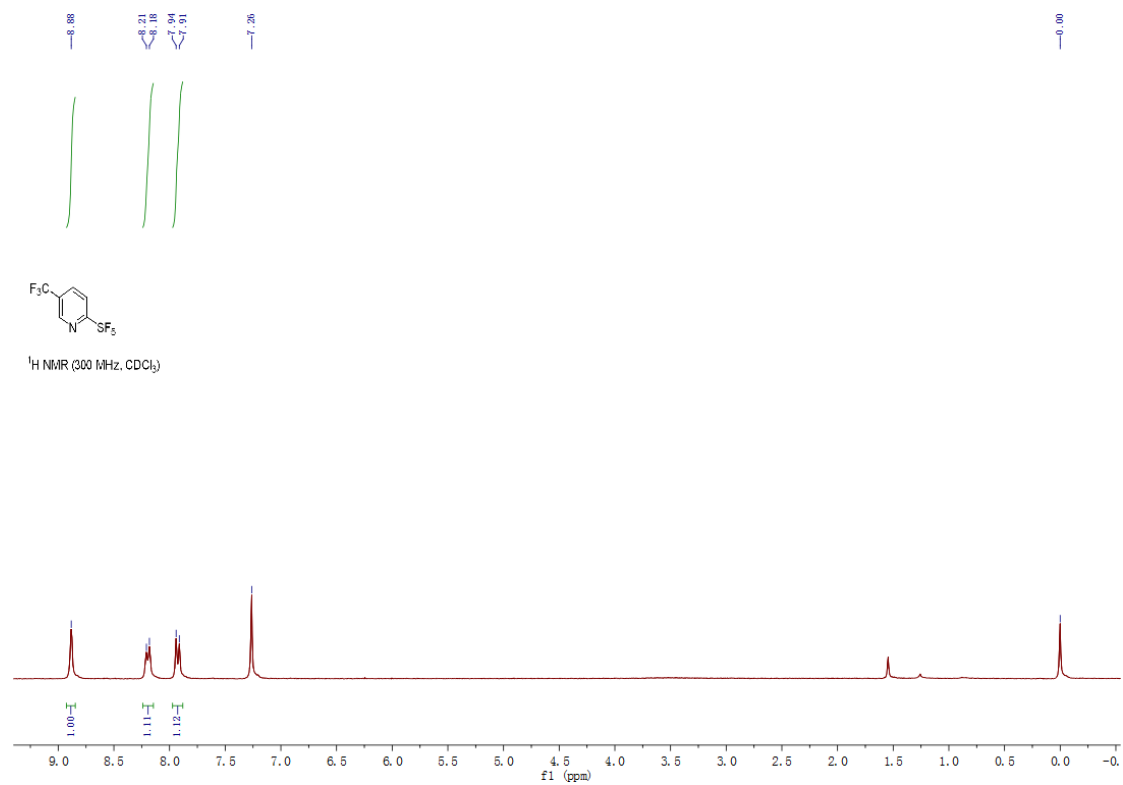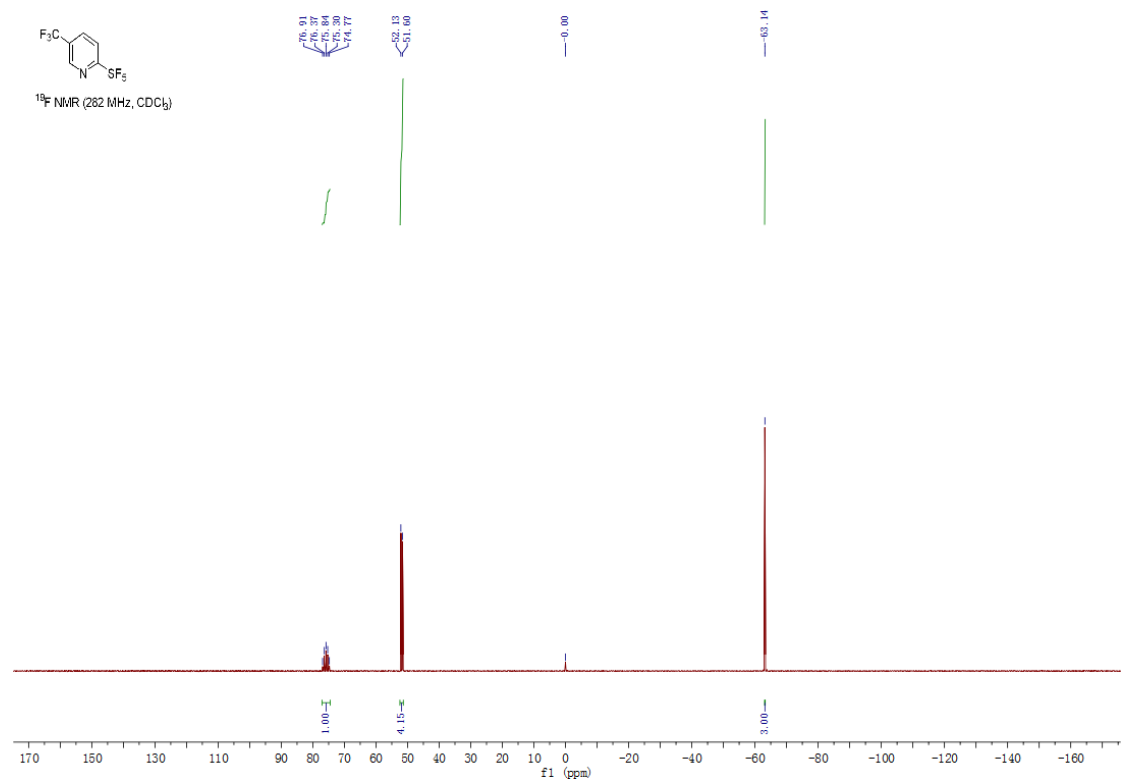

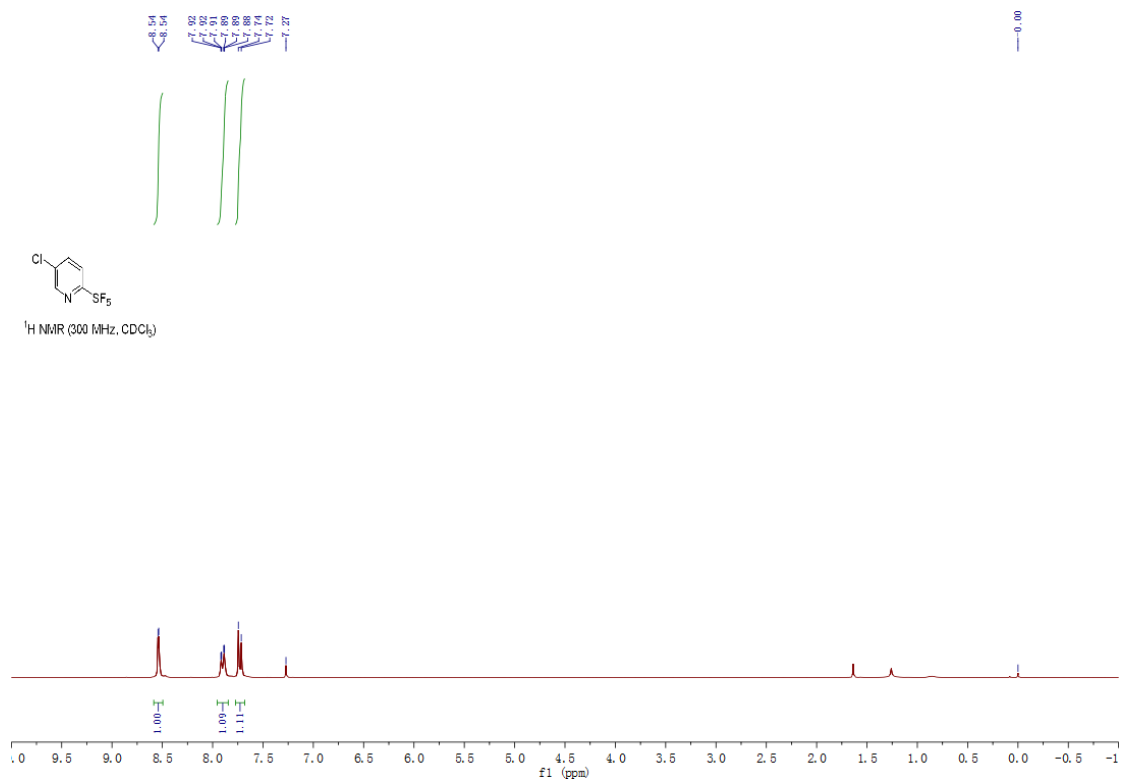

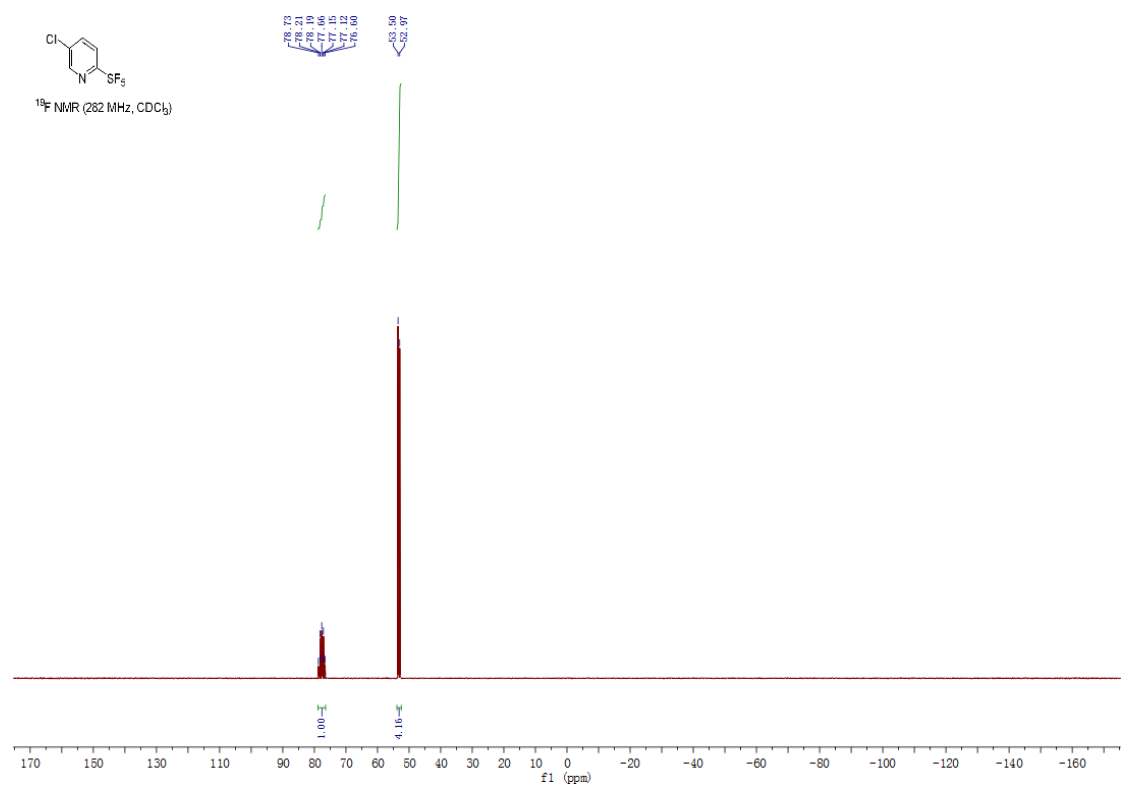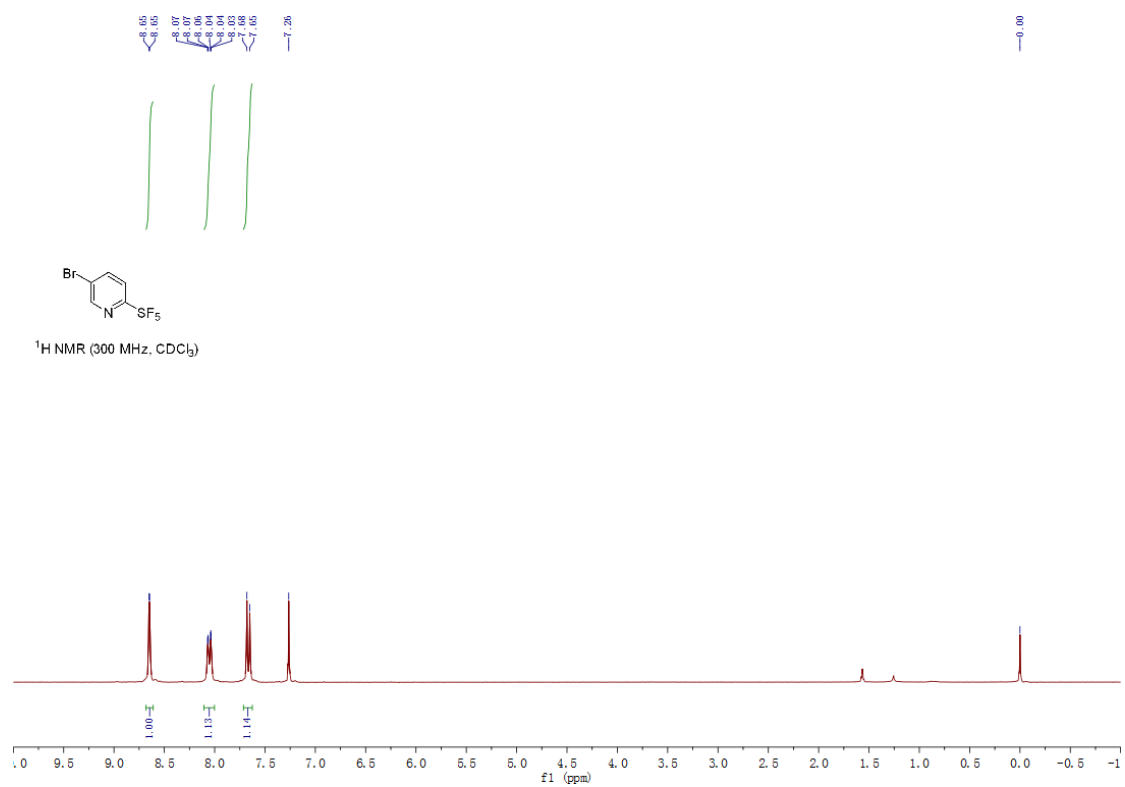

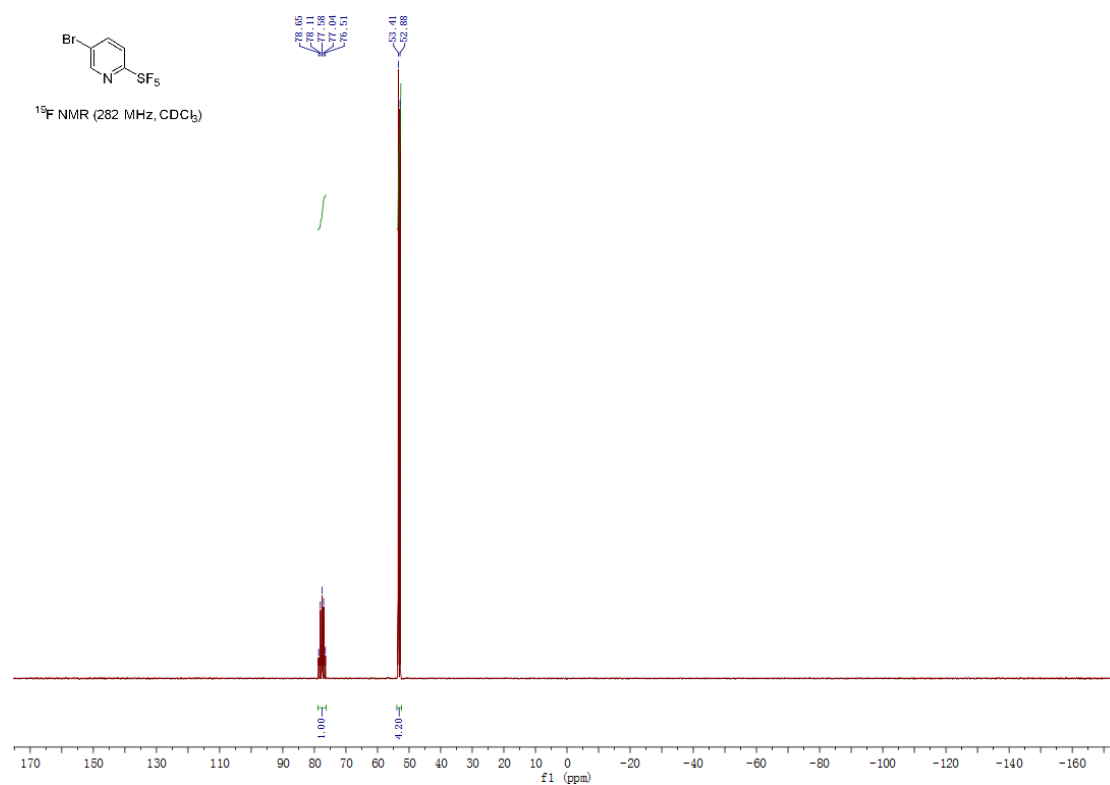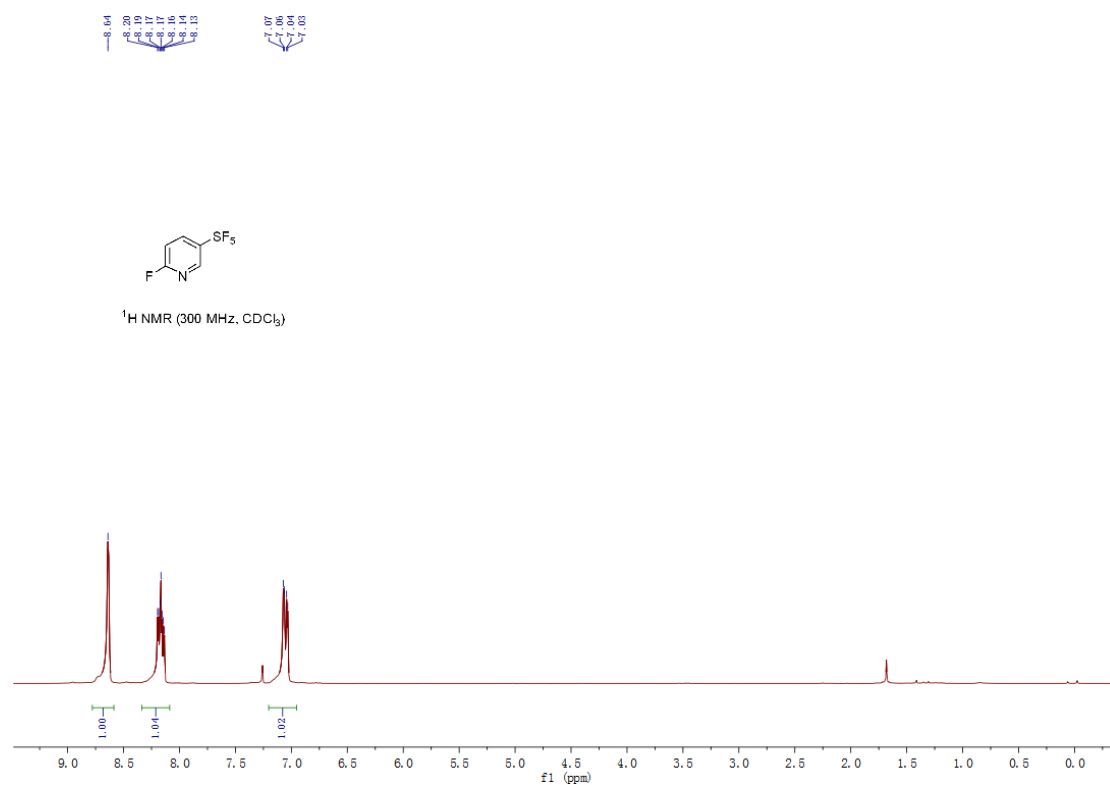



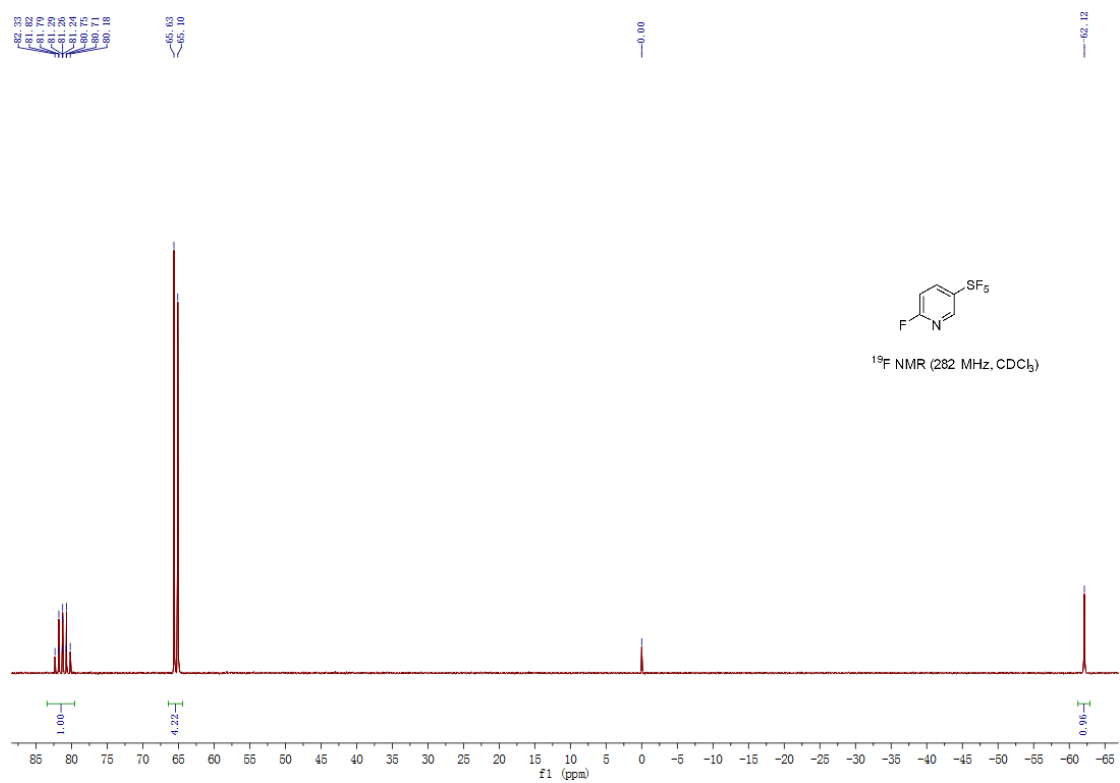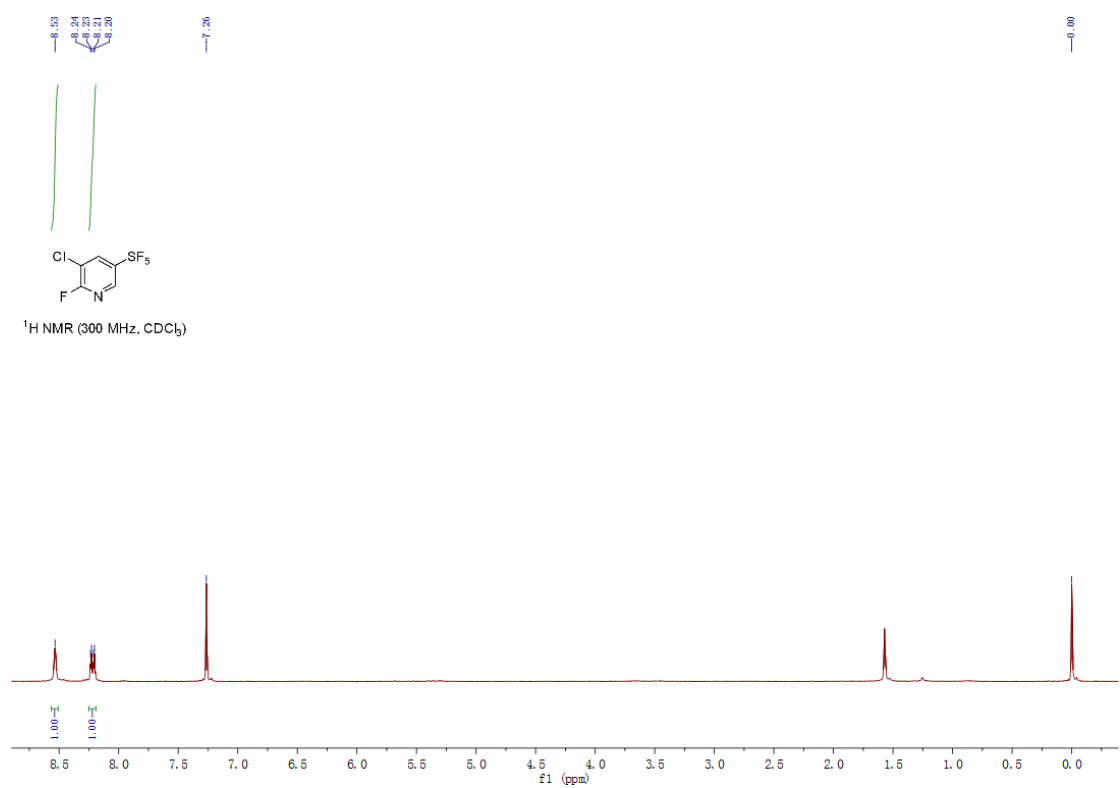

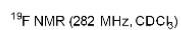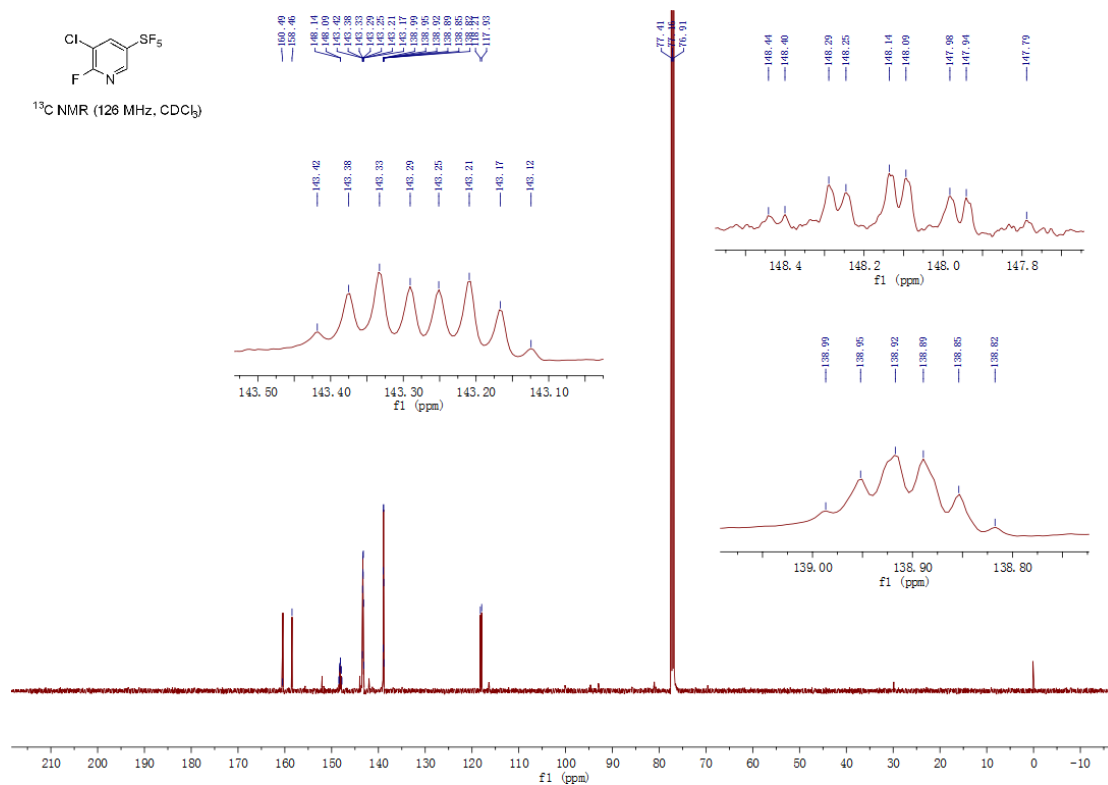

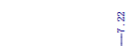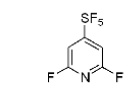

<sup>1</sup>H NMR (300 MHz, CDCl<sub>3</sub>)

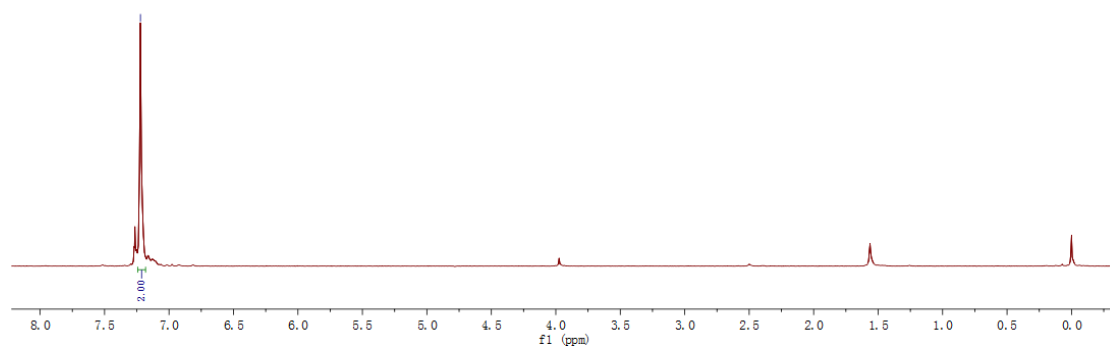

77.35, 77.23, 77.17, 77.11, 77.05, 76.98, 76.90, 76.82, 61.18, 60.94

63.14

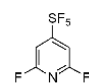

<sup>19</sup>F NMR (282 MHz, CDCl<sub>3</sub>)

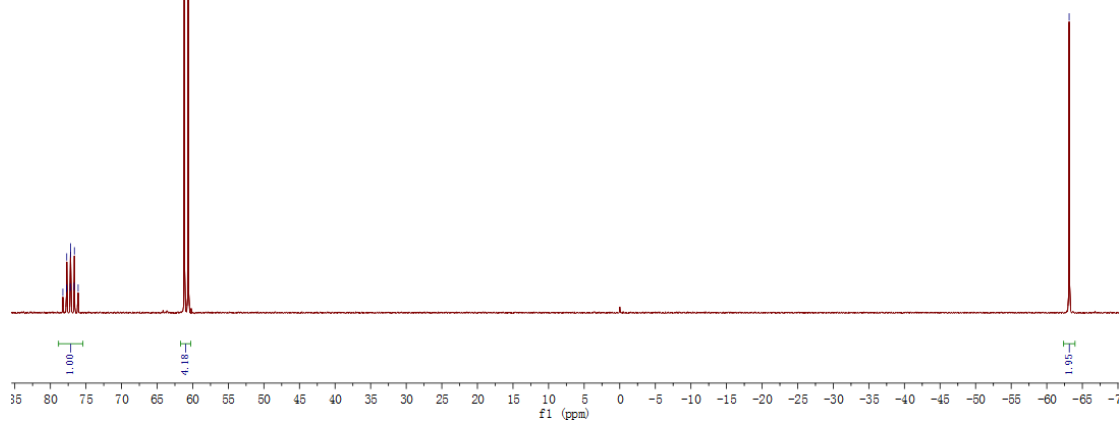

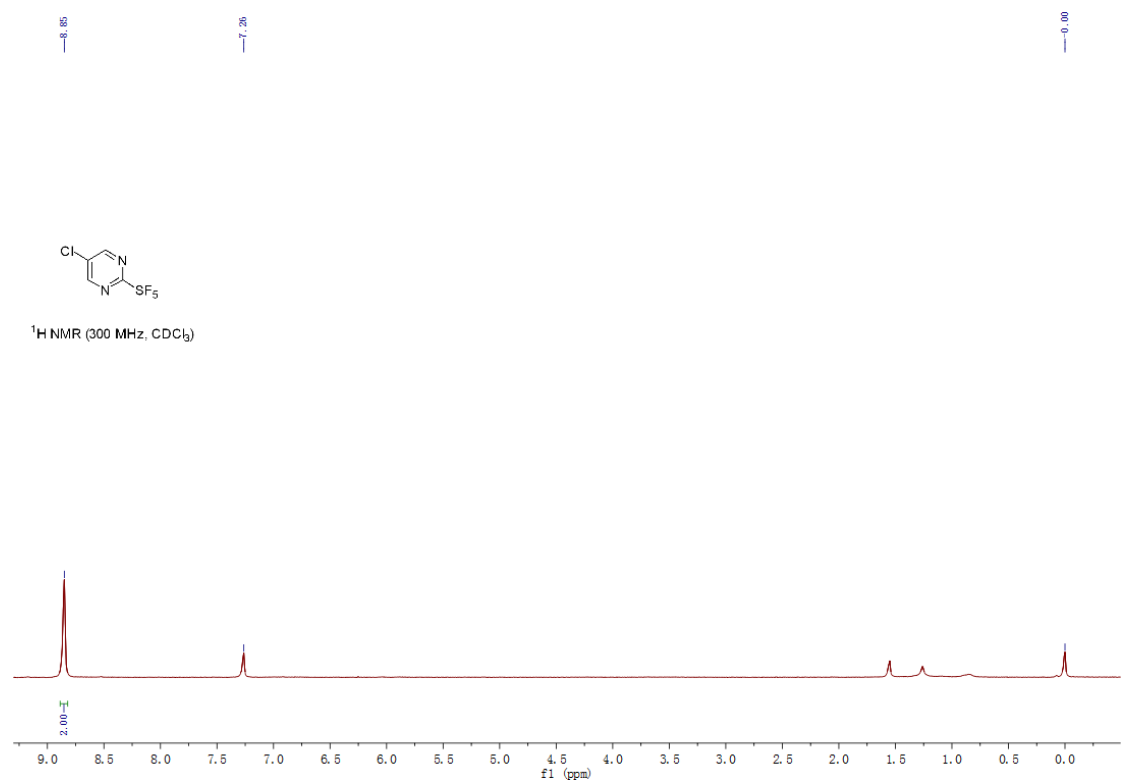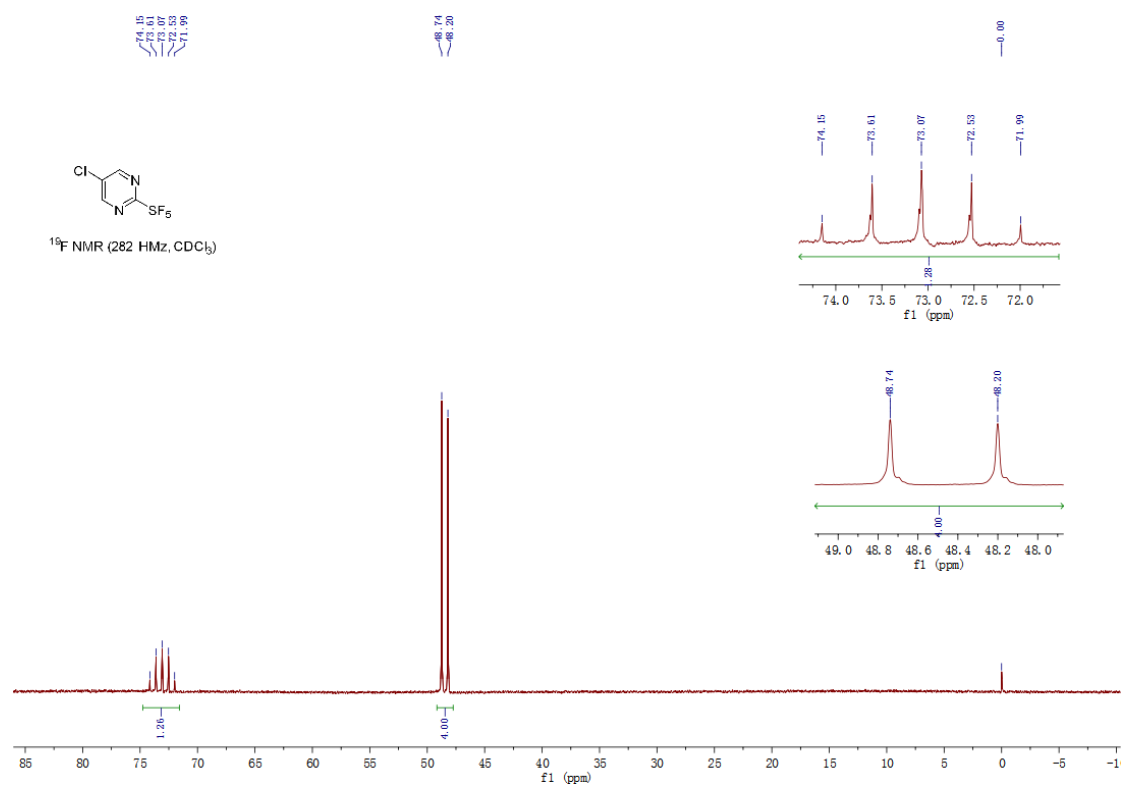

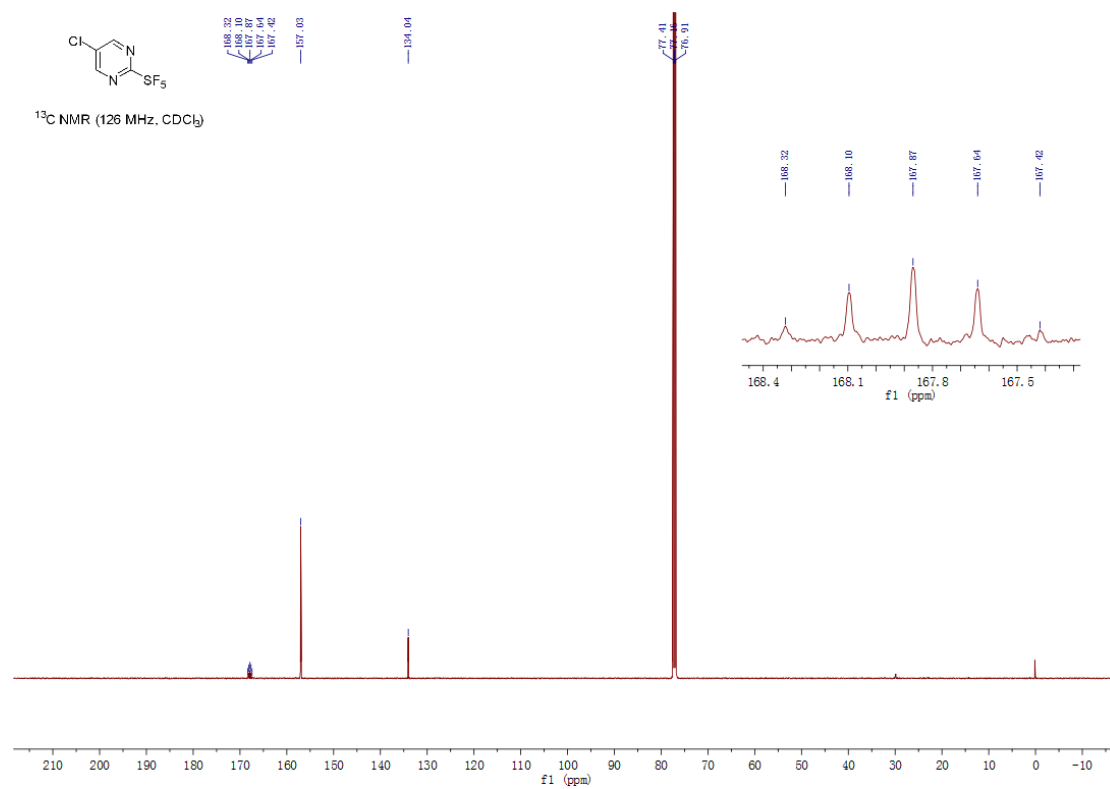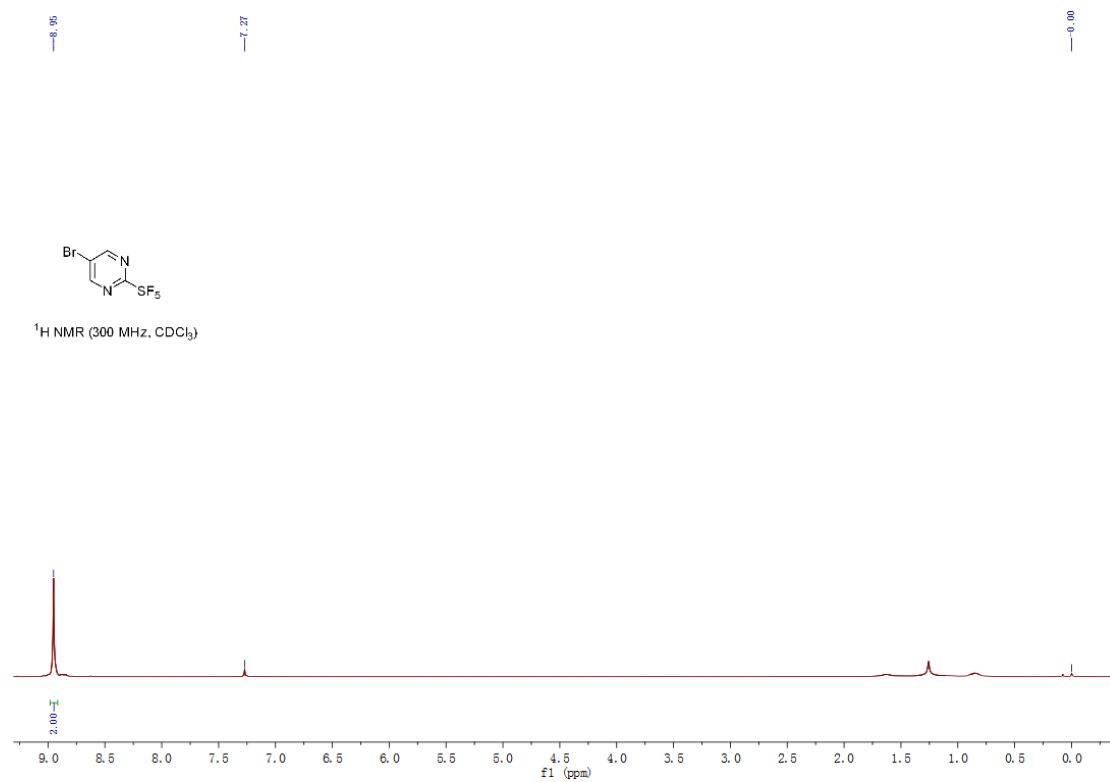

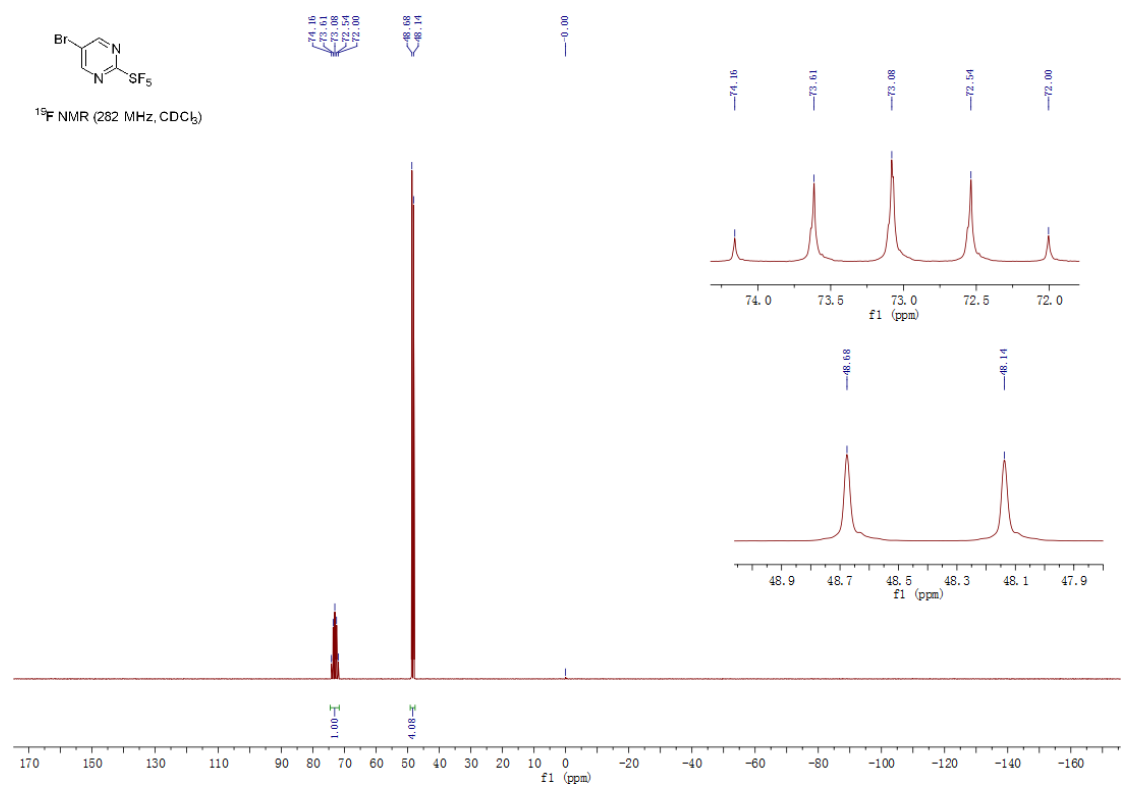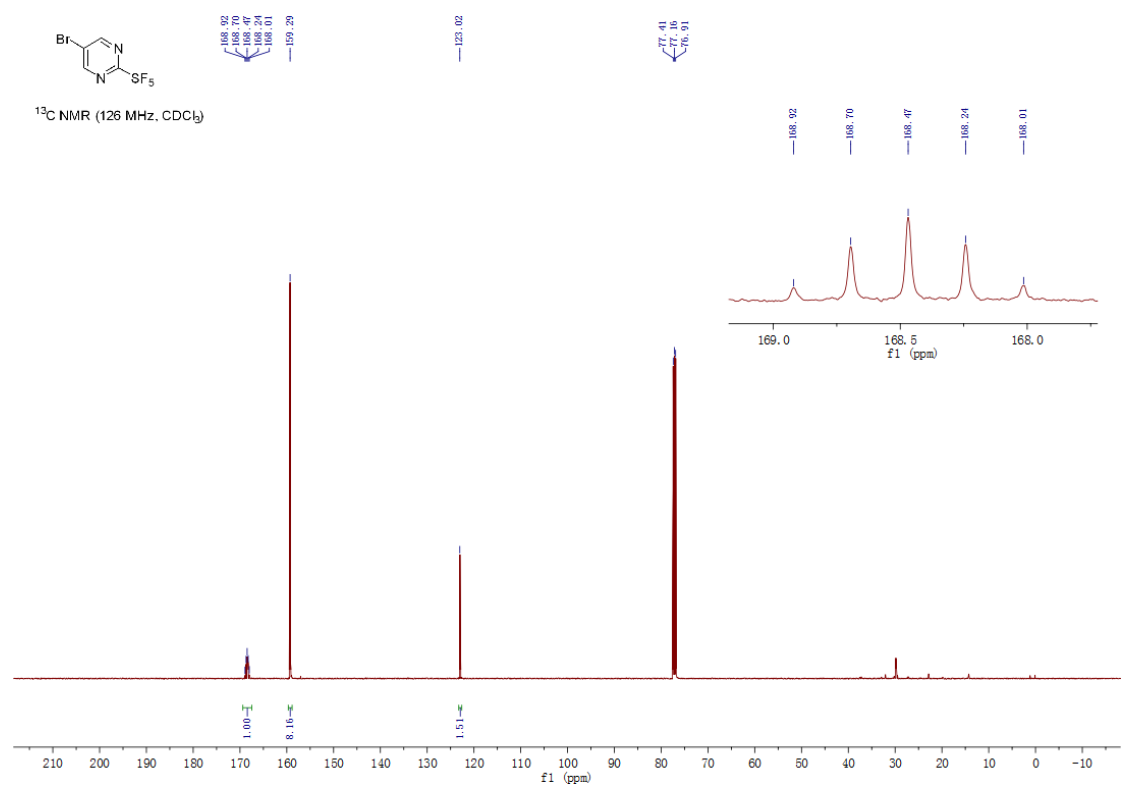

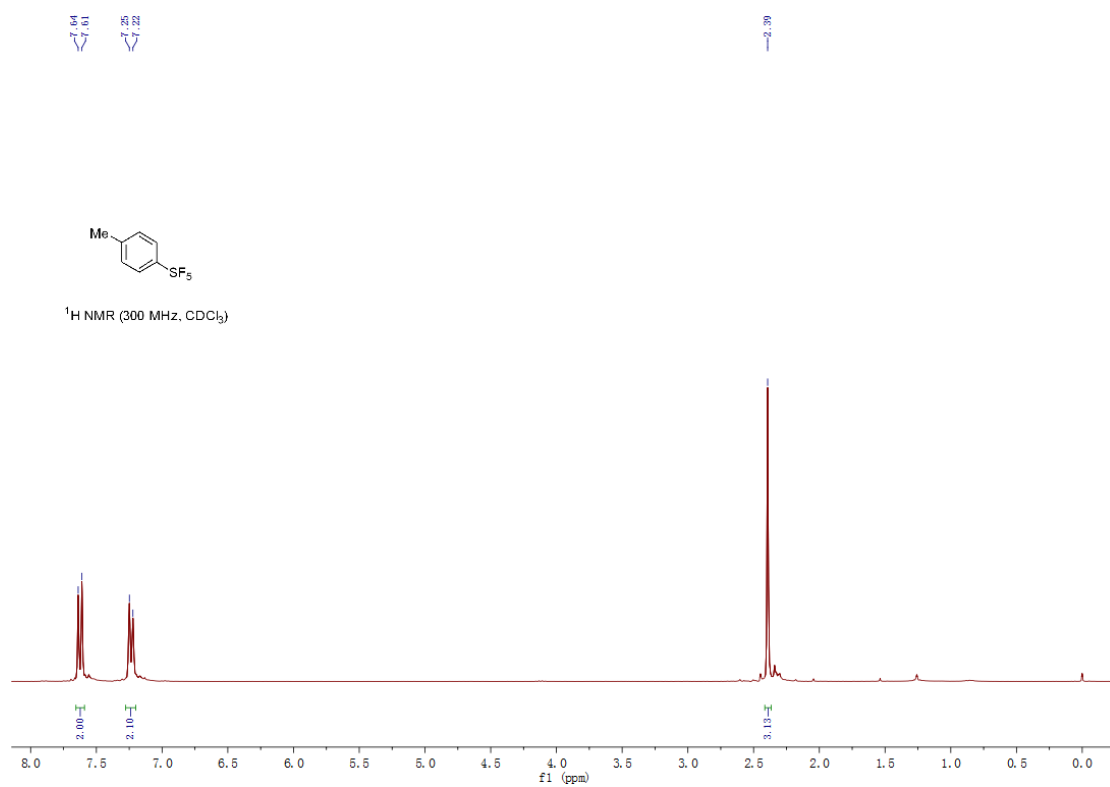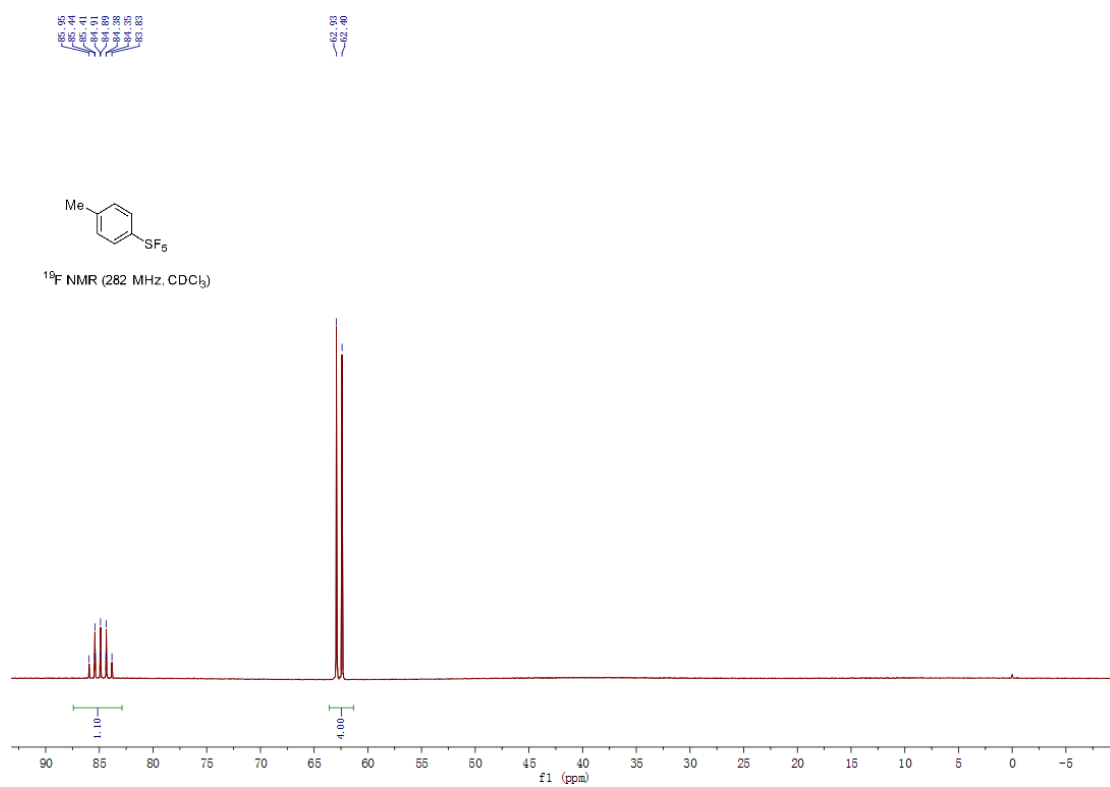

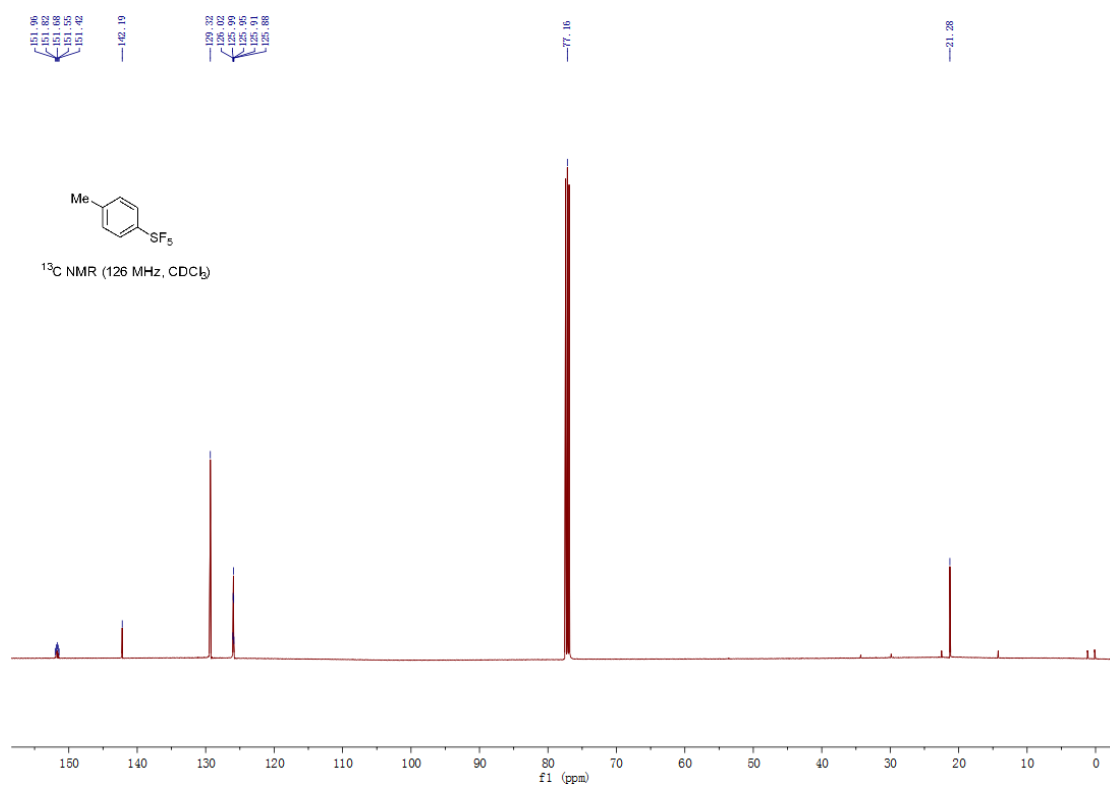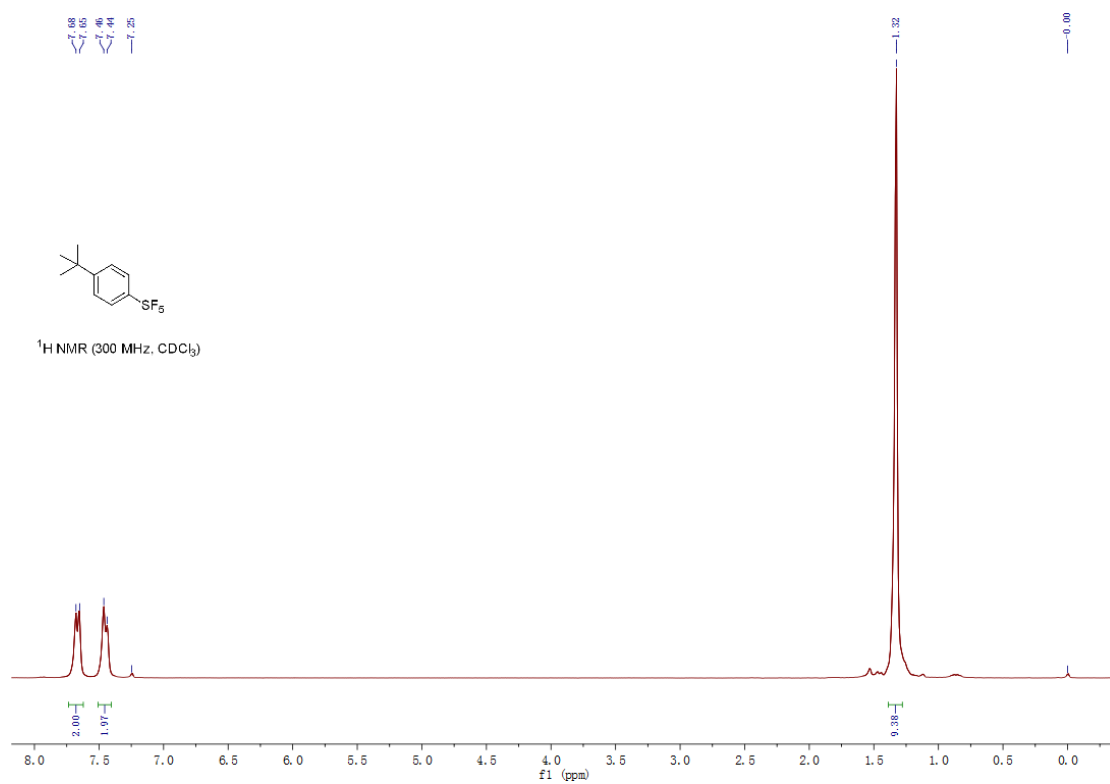



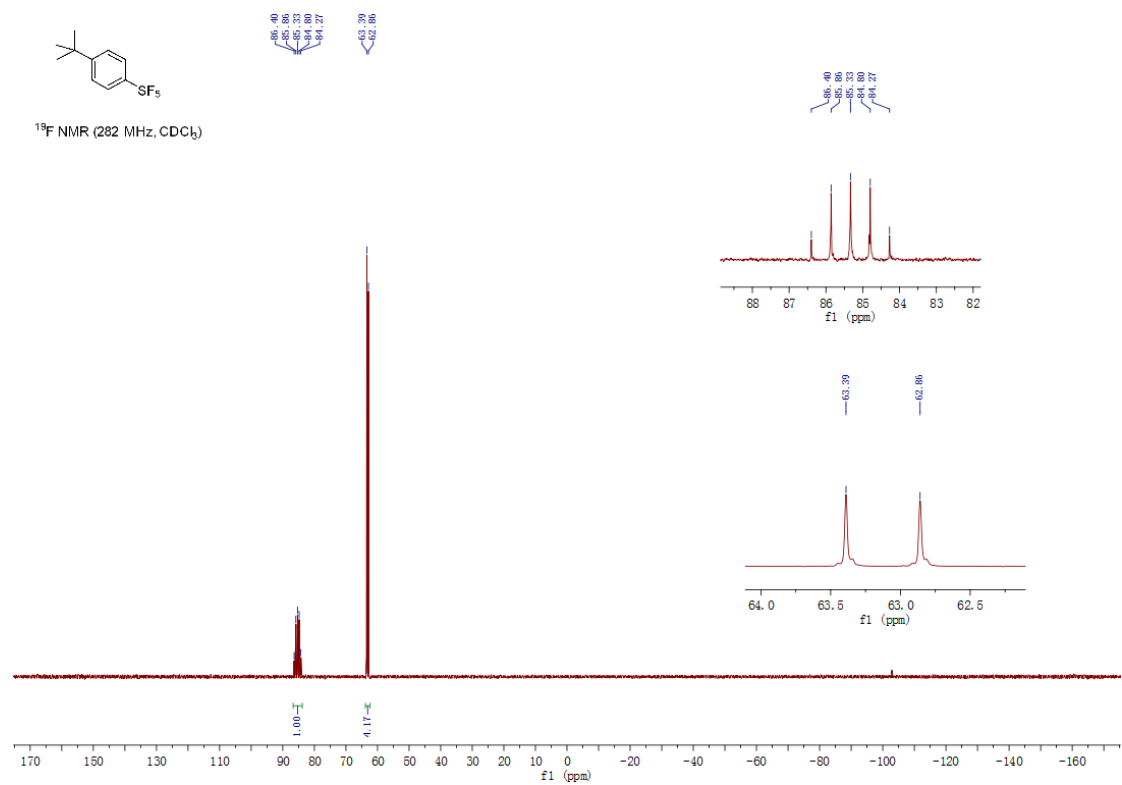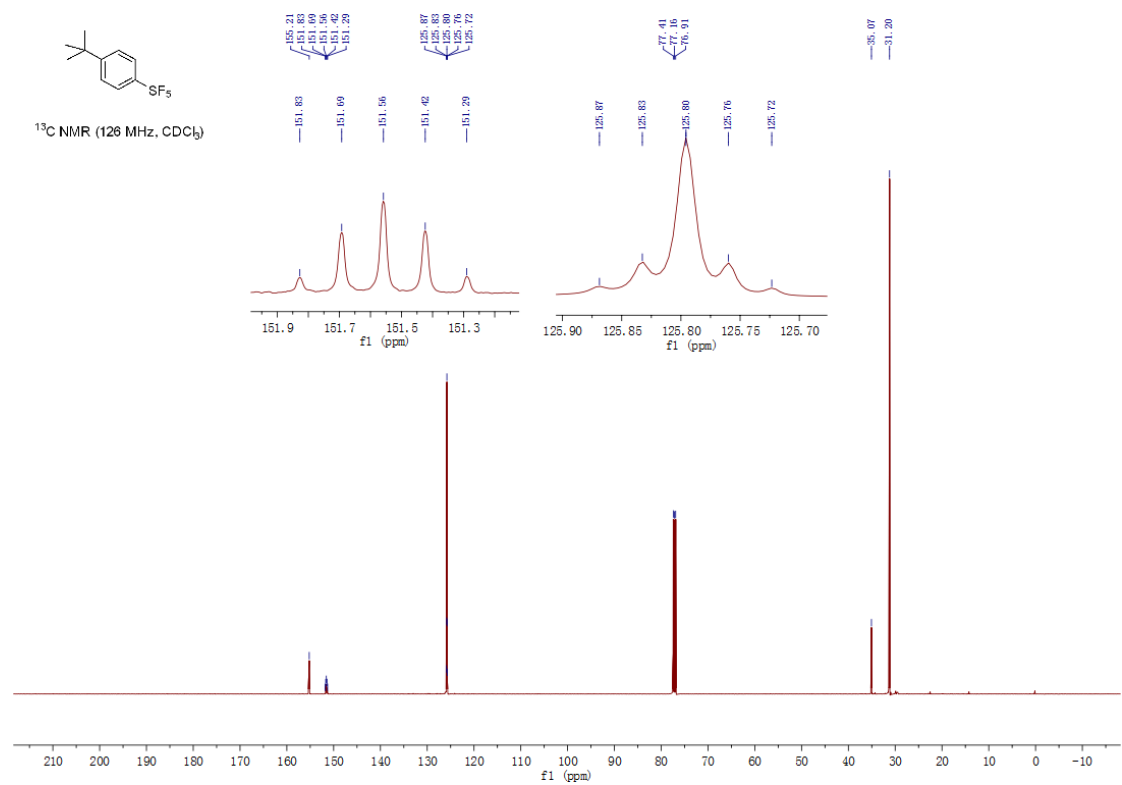

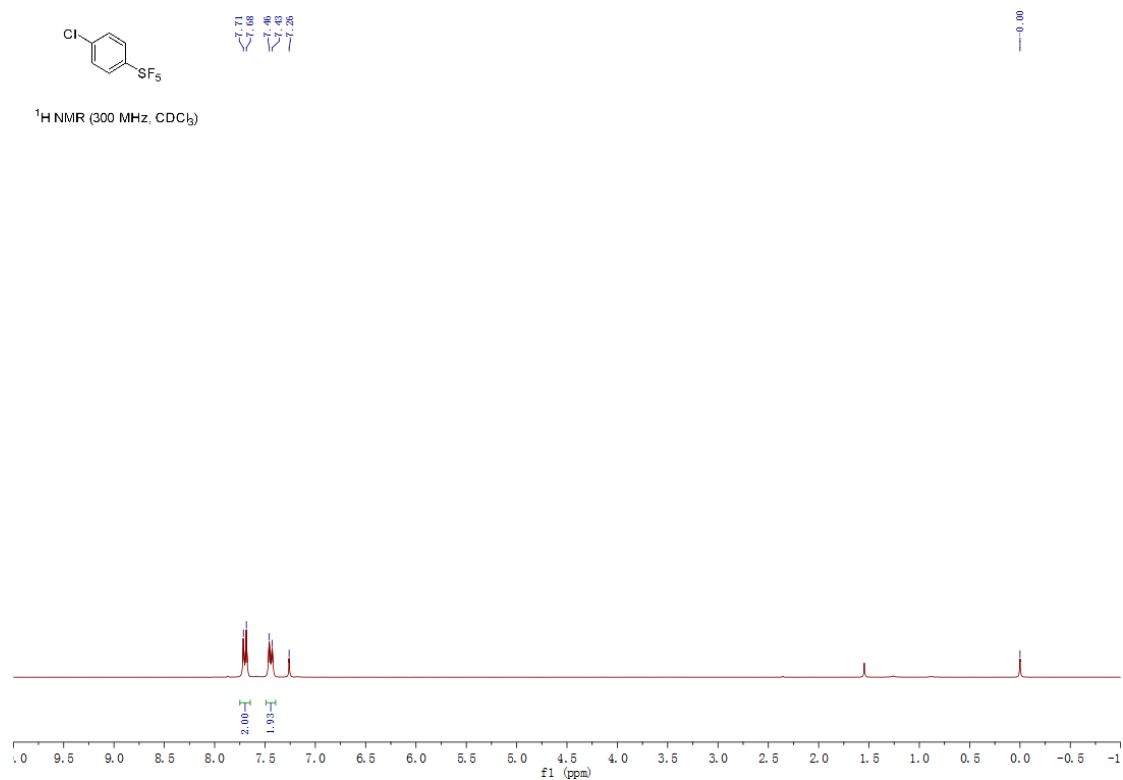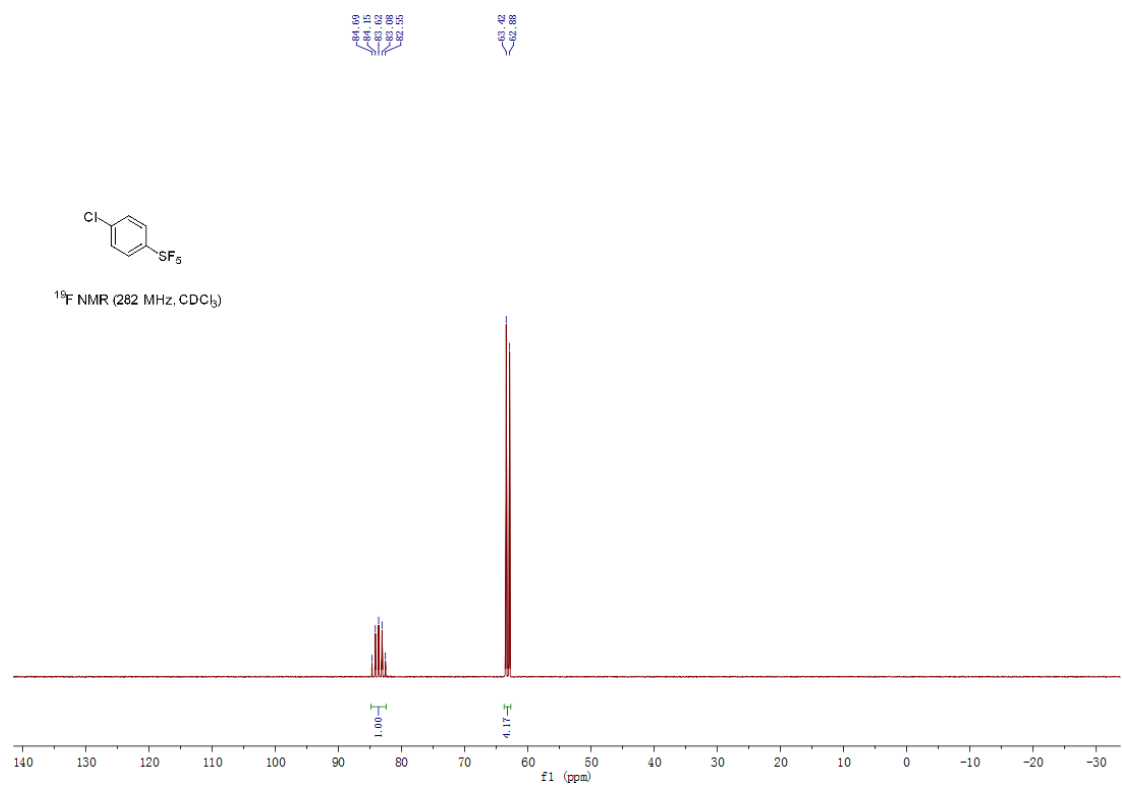

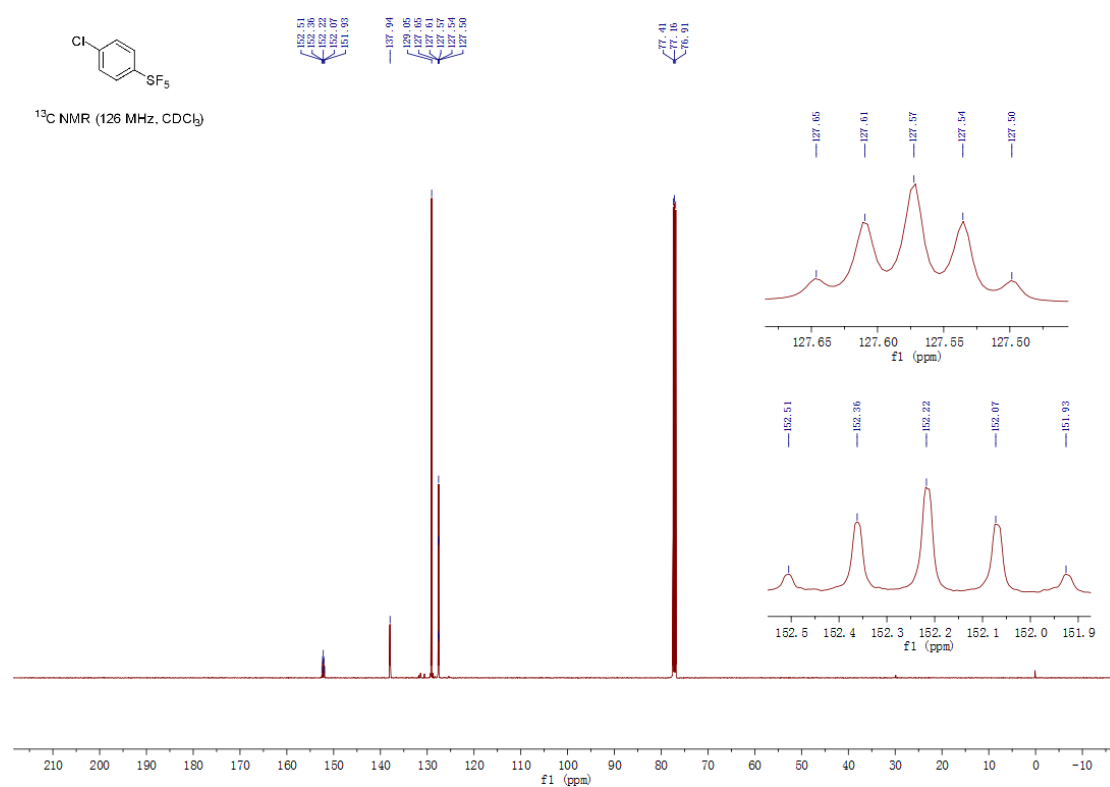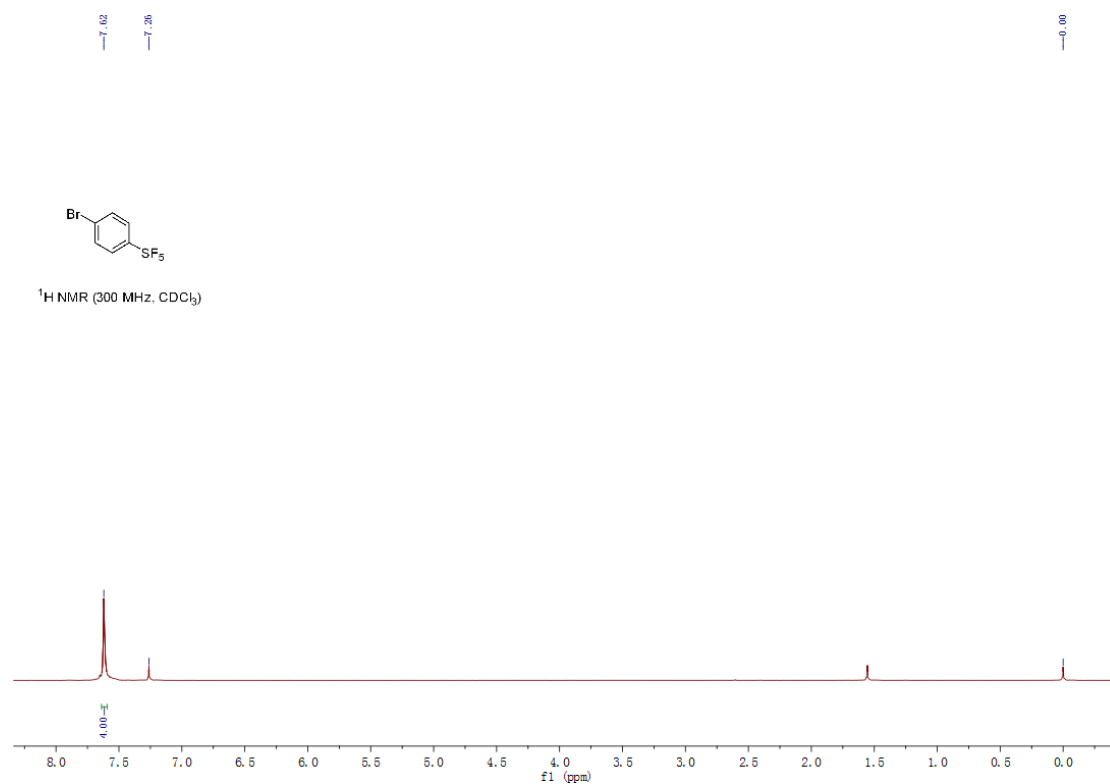

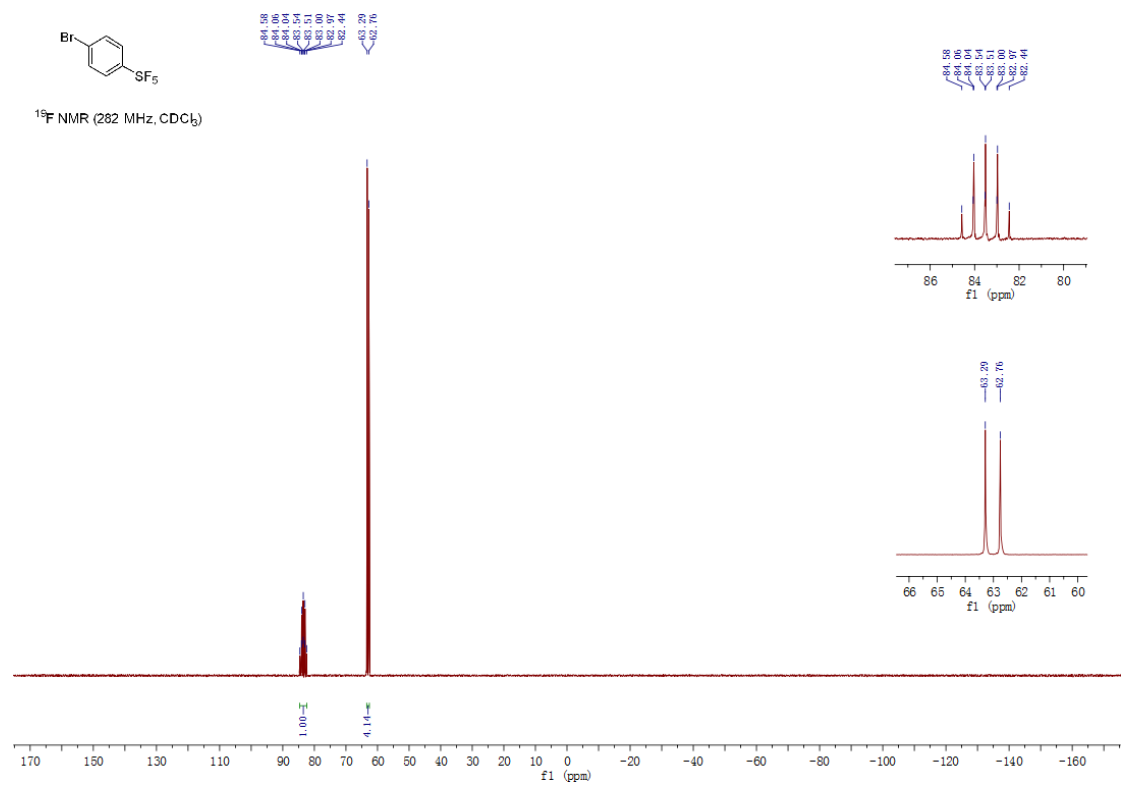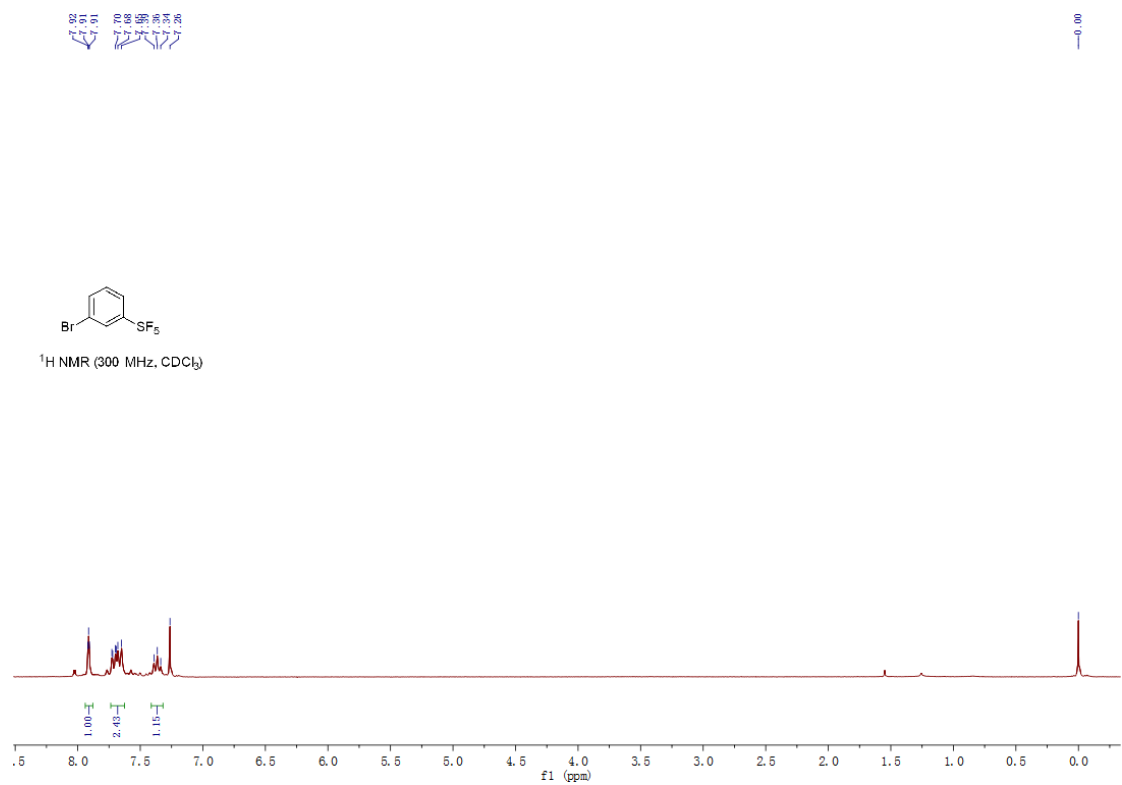

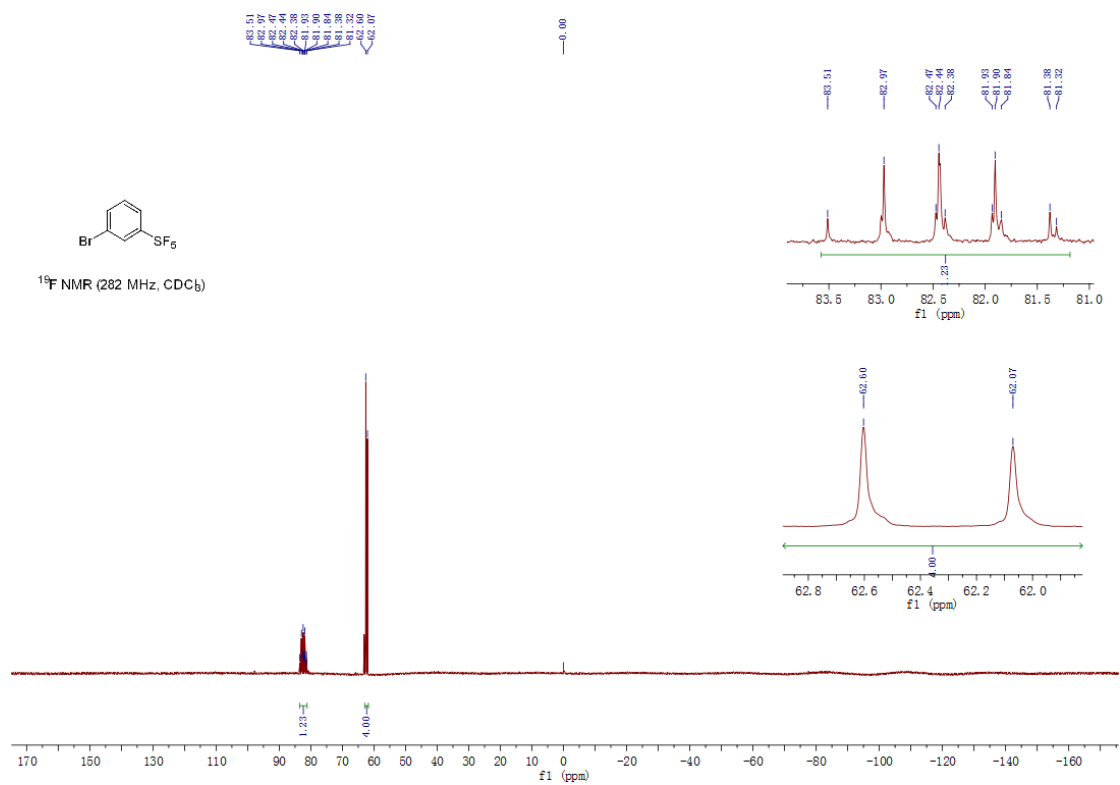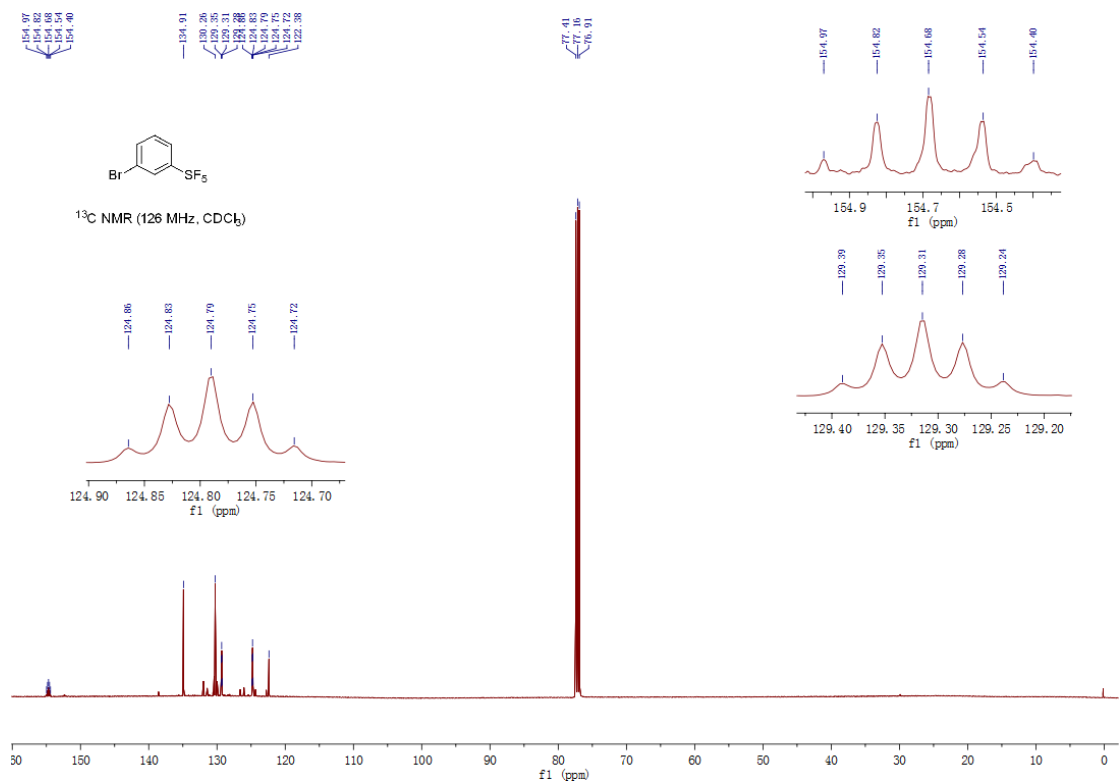

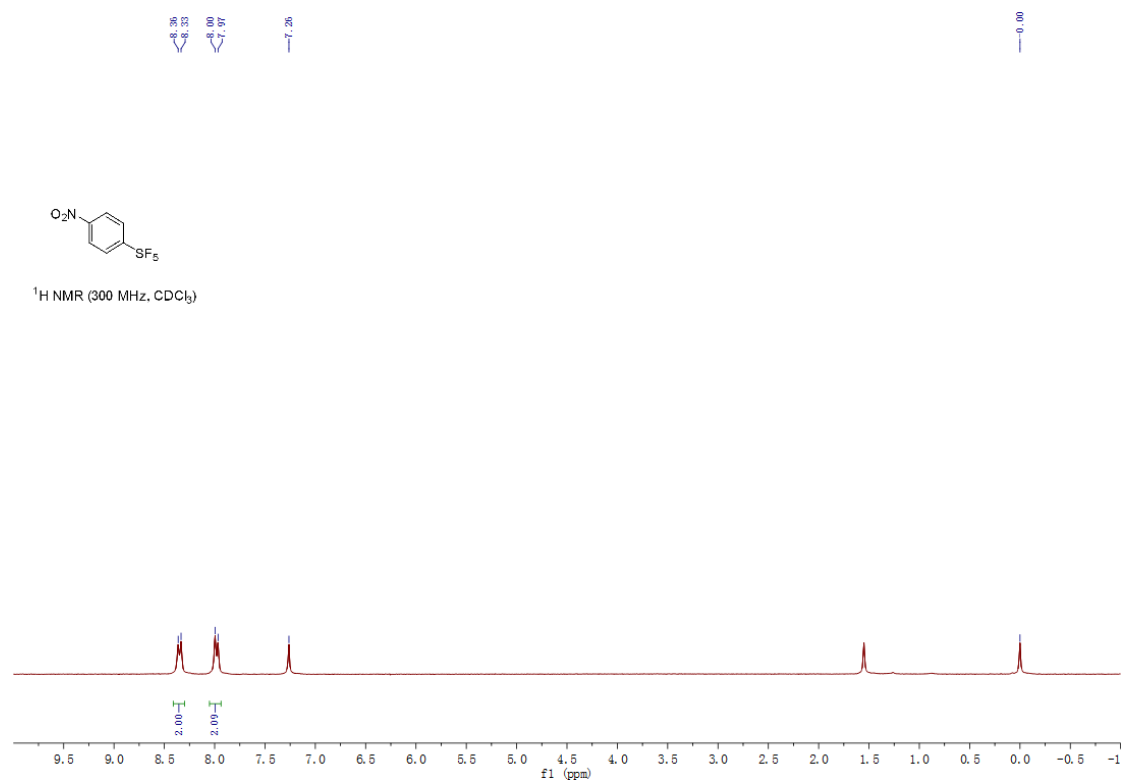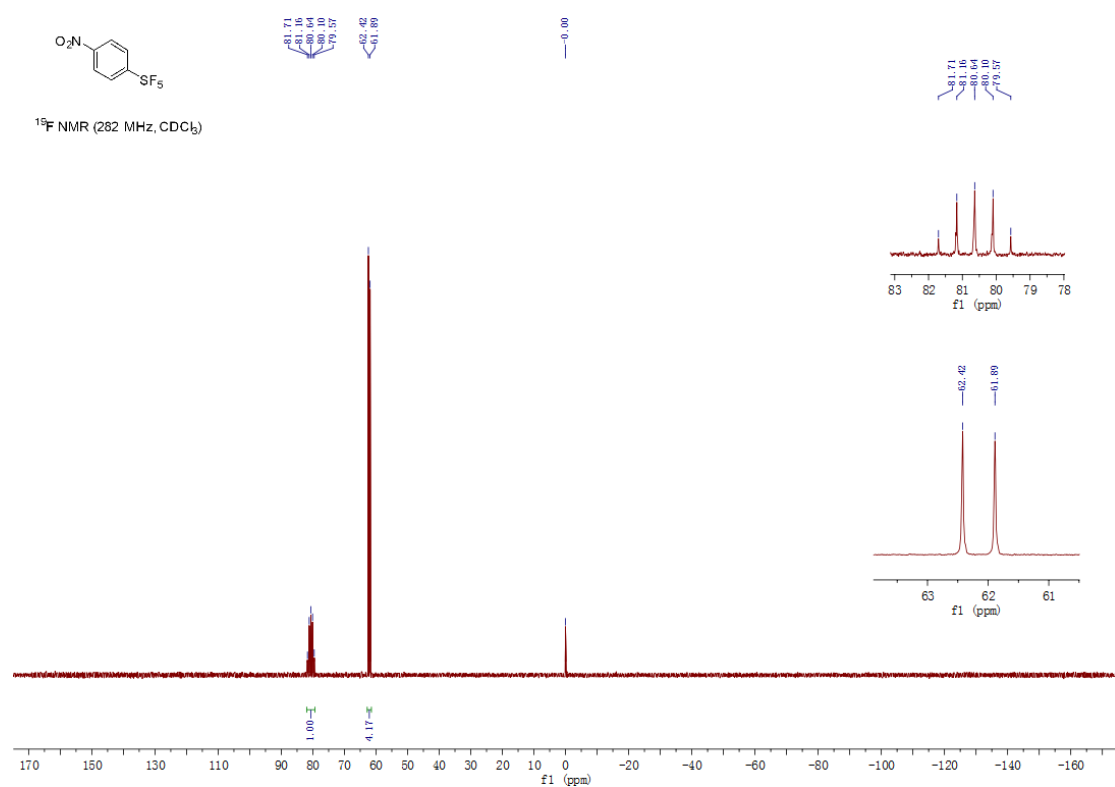

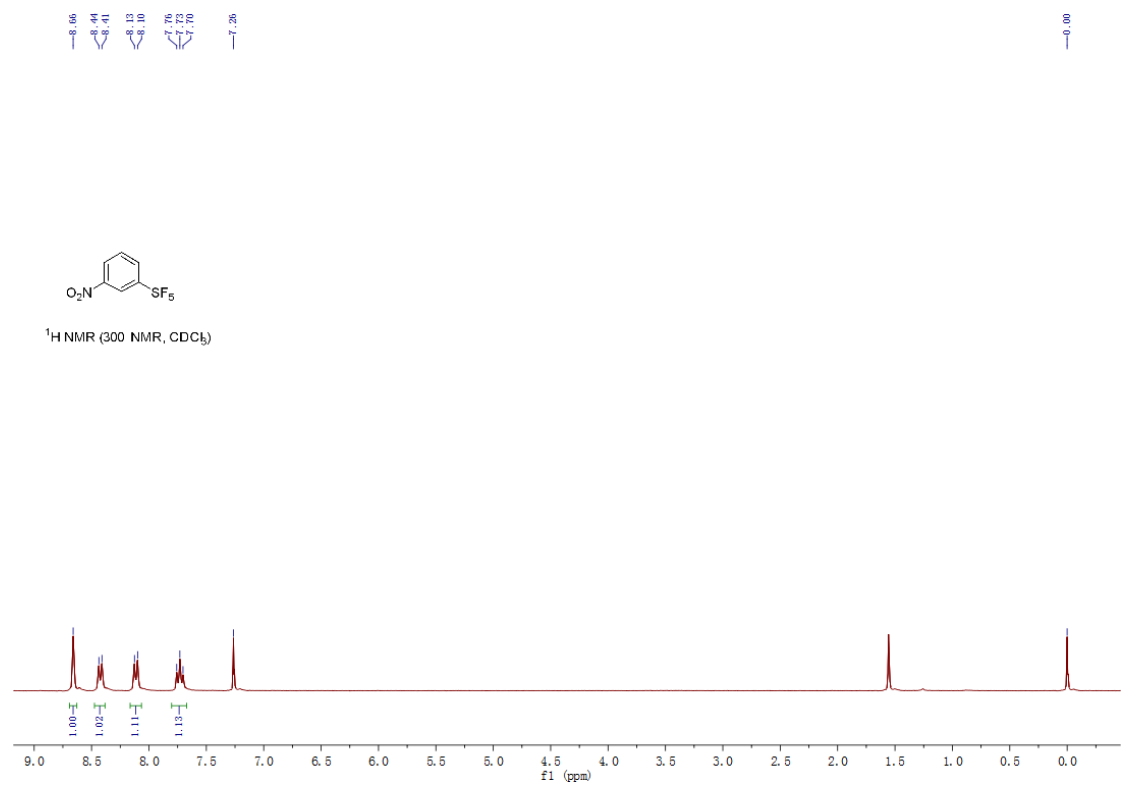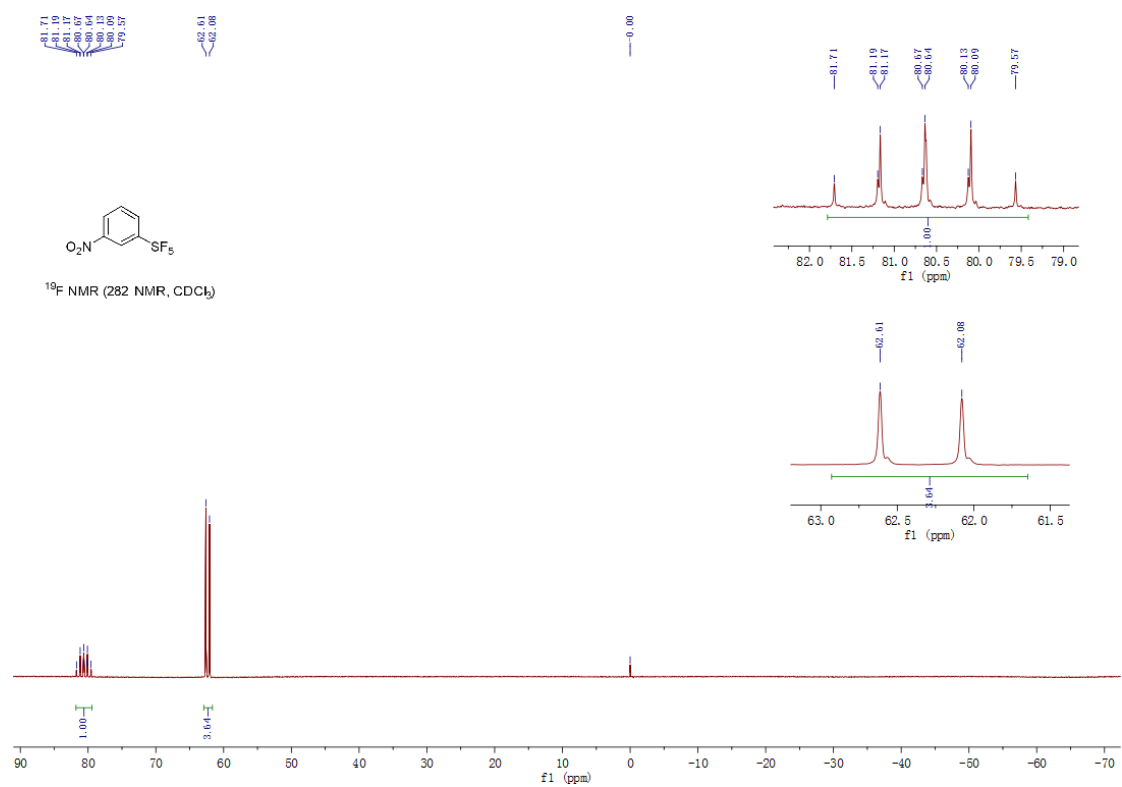

Supplement: c7cc02802d1.pdf [file c7cc02802d1.pdf]
